1 **Using genetic variation to disentangle the complex relationship between food intake and**  
2 **health outcomes.**

3

4 **Authors**

5 Nicola Pirastu<sup>1†</sup>, Ciara McDonnell<sup>1,2\*</sup>, Eryk J. Grzeszkowiak<sup>1\*</sup>, Ninon Mounier<sup>3,4</sup>, Fumiaki

6 Imamura<sup>5</sup>, Jordi Merino<sup>6,7,8</sup>, Felix R. Day<sup>5</sup>, Jie Zheng<sup>9</sup>, Nele Taba<sup>10,11</sup>, Maria Pina Concas<sup>11</sup>,

7 Linda Repetto<sup>1</sup>, Katherine A. Kentistou<sup>1,2</sup>, Antonietta Robino<sup>12</sup>, Tõnu Esko<sup>11,8</sup>, Peter K.

8 Joshi<sup>1</sup>, Krista Fischer<sup>11</sup>, Ken K. Ong<sup>5</sup>, Tom R. Gaunt<sup>9</sup>, Zoltan Kutalik<sup>3,4</sup>, John R. B. Perry<sup>5</sup>,

9 James F. Wilson<sup>1,13</sup>.

10

11 **Affiliations**

12 <sup>1</sup> Centre for Global Health Research, Usher Institute, University of Edinburgh, Teviot Place,  
13 Edinburgh, EH8 9AG, Scotland.

14 <sup>2</sup> Centre for Cardiovascular Sciences, Queen's Medical Research Institute, University of  
15 Edinburgh, Royal Infirmary of Edinburgh, Little France Crescent, Edinburgh EH16 4TJ,  
16 Scotland

17 <sup>3</sup> Center for Primary Care and Public Health, University of Lausanne, Lausanne, Switzerland

18 <sup>4</sup> Swiss Institute of Bioinformatics, Lausanne, Switzerland

19 <sup>5</sup> MRC Epidemiology Unit, Institute of Metabolic Science, Cambridge Biomedical Campus,  
20 University of Cambridge School of Clinical Medicine, Box 285, Cambridge, CB2 0QQ, UK

21 <sup>6</sup> Diabetes Unit and Center for Genomic Medicine, Massachusetts General Hospital, Boston,  
22 MA, USA

23 <sup>7</sup> Program in Medical and Population Genetics, Broad Institute, Cambridge, MA, USA

24 <sup>8</sup> Department of Medicine, Harvard Medical School, Boston, MA, USA

25 <sup>9</sup> MRC Integrative Epidemiology Unit, Bristol Medical School, Bristol, UK

26 <sup>10</sup> Estonian Genome Center, Institute of Genomics, University of Tartu, Tartu, Riia 23b,

27 51010, Estonia

28 <sup>11</sup> Institute for Maternal and Child Health - IRCCS “Burlo Garofolo”, Trieste, Italy

29 <sup>12</sup> Department of Medical Epidemiology and Biostatistics, Karolinska Institutet, Nobels väg

30 12A, SE-171 77 Stockholm, Sweden

31 <sup>13</sup> MRC Human Genetics Unit, Institute of Genetic and Molecular Medicine, University of

32 Edinburgh, Western General Hospital, Crewe Road, Edinburgh, EH4 2XU, Scotland

33 <sup>14</sup> Institute of Molecular and Cell Biology, University of Tartu, Tartu, Riia 23, 51010, Estonia

34

35 \*Authors contributed equally to this work.

36 †Correspondence should be addressed to Nicola Pirastu, [nicola.pirastu@ed.ac.uk](mailto:nicola.pirastu@ed.ac.uk)

37

38

39

40

41

42

43

44 **Abstract:**

45 **Despite food choices being one of the most important factors influencing health, efforts**  
46 **to identify individual food groups and dietary patterns that cause disease have been**  
47 **challenging, with traditional nutritional epidemiological approaches plagued by biases**  
48 **and confounding. After identifying 302 individual genetic determinants of dietary**  
49 **intake in 445,779 individuals in the UK Biobank study, we develop a statistical genetics**  
50 **framework that enables us, to directly assess the impact of food choices on health**  
51 **outcomes. We show that the biases which affect observational studies extend also to**  
52 **GWAS, genetic correlations and causal inference through genetics, which can be**  
53 **corrected by applying our methods. Finally, by applying Mendelian Randomization**  
54 **approaches to the corrected results we identify some of the first robust causal**  
55 **associations between eating patterns and cancer, heart disease, obesity, and several**  
56 **other health related risk factors, distinguishing between the effects of specific foods or**  
57 **dietary patterns.**

58

59

60

61

62

63

64

65

66

## 67 **Introduction**

68 Given their profound impact on human well-being, diet is one of the most studied human  
69 behaviours. Quality, quantity, and patterns of consumed foods are associated with a wide  
70 range of medical conditions such as metabolic, inflammatory, or mental health diseases<sup>1</sup>.  
71 However, despite the growing number of studies reporting associations between diet and  
72 health outcomes, it has been challenging to establish causal relationships due methodological  
73 limitations such as measurement error, confounding, and reverse causation. To date, several  
74 methods have been devised to try to account for intrinsic limitations in nutritional studies  
75 such as calibration of food records<sup>2</sup> or the implementation of domiciled feeding studies (ie.  
76 the PREDICT study<sup>3</sup>) in which participants are instructed to eat only the food provided by the  
77 study. Although these methods have helped in addressing some the limitations related to food  
78 consumption measurement, problems still remain especially when it comes to measure the  
79 effects of food on health over a long period of time.

80 In this context genetics may represent an alternative approach through the use of Mendelian  
81 Randomization. Mendelian Randomization (MR) is a methodological approach in which  
82 genetic variants associated with a phenotype of interest are used as instrumental variables to  
83 measure the “life-long effect of an exposure” to an outcome.<sup>4</sup> To date, several MR studies  
84 have been designed to investigate the associations between the consumption of single food  
85 groups, such as alcoholic beverages<sup>5</sup>, coffee<sup>6</sup>, milk<sup>7-9</sup> and specific health outcomes, but a  
86 systematic study investigating the overall role of diet is missing. In addition, previous MR  
87 studies have not accounted for the fact that genetic variants associated with reported dietary  
88 intake may be primarily associated with other risk factors or social determinants of health  
89 which may confound the causal estimates if used. In addition, previous studies on single food  
90 groups have not accounted for inter-relationships between different foods thus limiting the  
91 interpretability of the findings.

92 Given the complex number of factors that are driving the association between diet and health  
93 outcomes, the present study was designed to initially identify the genetic variants associated  
94 with reported food consumption, and then to leverage a causal inference statistical framework  
95 to systematically investigate the causal effects of dietary factors on health outcomes, while  
96 accounting for the effects that health determinants have on habitual dietary intake reporting.

## 97 **Methods**

### 98 **Study population and genome-wide association for dietary intake**

99 The UK Biobank<sup>10</sup> is a large population-based cohort including 500 000 adults aged between  
100 40 and 69 years at baseline across 22 assessments centers in the United Kingdom. Data were  
101 collected based on clinical examinations, assays of biological samples, detailed information  
102 on self-reported health characteristics, and genome-wide genotyping. Dietary intake in UK  
103 Biobank was assessed using a food frequency questionnaire which included questions about  
104 the frequency of consumption specific foods and beverages over the past year. The number of  
105 samples used for each trait can be found in table S1 while a detailed description of the  
106 phenotypes, can be found in the in the supplementary methods 1.2 and table S2.

107 We used the BOLT-LMM software<sup>11</sup> to assess the association between the genetic variants  
108 across the human genome and 29 food phenotypes. Analyses were conducted on genetic data  
109 release version 3 imputed to the HRC panel<sup>12</sup>, as provided by the UK Biobank

110 ([http://www.ukbiobank.ac.uk/wp-](http://www.ukbiobank.ac.uk/wp-content/uploads/2014/04/UKBiobank_genotyping_QC_documentation-web.pdf)  
111 [content/uploads/2014/04/UKBiobank\\_genotyping\\_QC\\_documentation-web.pdf](http://www.ukbiobank.ac.uk/wp-content/uploads/2014/04/UKBiobank_genotyping_QC_documentation-web.pdf)). Population  
112 stratification was assessed using LD-score regression as implemented in LD Hub<sup>13,14</sup> using  
113 the LD scores provided with the software. Table S15 reports for each food trait the LD  
114 regression intercept and heritability estimation using ldsc. Cluster analysis conducted on the  
115 foods identified 5 main groups of traits (see additional online methods paragraph 1.8 and 2.2

116 for details of group definition) and we thus set the genome-wide significance threshold at  
117  $1 \times 10^{-8}$ . Work within was conducted under UKB application 19655. Participants enrolled in  
118 UK Biobank have signed consent forms. Replication analyses for identified signals  
119 associated with food phenotypes were conducted independently by using genetic and dietary  
120 data from the EPIC-Norfolk Study<sup>15</sup> and the Fenland Study<sup>16</sup>. Details additional online  
121 methods 1.4.

### 122 **Investigating the effect of health outcomes on reported food intake using MR.**

123 Univariable MR analyses were initially conducted to measure the causal effect of health  
124 outcomes on food consumption using the TwoSampleMR<sup>17</sup> R package. Exposures of interest  
125 were selected amongst those for which nutritional advice is given and included body mass  
126 index (BMI), low density lipoprotein cholesterol (LDLc), high density lipoprotein cholesterol  
127 (HDLc), Total cholesterol, Triglycerides, Diastolic and Systolic blood pressure, Type 2  
128 diabetes, and coronary artery disease. In addition, we included educational attainment as a  
129 proxy of socio-economic status which is likely to affect food consumption. The full list of  
130 studies from which the summary statistics were derived is detailed in Table S6. For each  
131 exposure we selected all SNPs with  $p < 5 \times 10^{-8}$  and  $r^2 < 0.001$  to be used as instruments in the  
132 MR analysis. After performing stepwise heterogeneity pruning we performed MR analysis  
133 using the inverse variance method<sup>18</sup>. We then tested if the intercept from the MR-Egger<sup>19</sup>  
134 regression was different from zero ( $p < 0.05$ ). If this was the case, MR-Egger was used for the  
135 analysis instead.

136

### 137 **Measuring the direct effects of food types on health outcomes and identifying genetic** 138 **variants with predominantly direct-effects**

139 One of the most important assumptions in MR is that the effect of the instrument on the  
140 outcome must be mediated only through the exposure of interest (sometimes referred as  
141 exclusion restriction criteria)<sup>20</sup>. In this light the instruments whose effect on food is mediated  
142 through the health outcomes or through educational attainment may violate this assumption  
143 acting as confounders in the relationship between the exposure and the outcome. Moreover if  
144 the mediating trait is acting on the reporting of food consumption and not food consumption  
145 itself it would mean that the genetic variant is not truly associated to food consumption and it  
146 would thus not be a valid instrument. It is thus important to estimate the direct effect (i.e., the  
147 effect that acts directly on food intake rather than is mediated through other factors see Figure  
148 1) the SNPs are exerting on actual food consumption in order to properly select the genetic  
149 variants to be used as instrumental variables.

150 To this end we use a modified version of the method implemented in bGWAS<sup>21</sup>. This method  
151 consists of a first step where the phenotype of interest (i.e., food consumption) is used as  
152 outcome in multivariable MR. Next, exposures of interest are selected using a forward step  
153 wise regression selection algorithm where each exposure is added until their p-value is less  
154 than 0.05. The method provides a corrected estimate for each genetic variant of its effect on  
155 the outcome trait once all mediated effects are removed. Further details can be found in  
156 supplementary methods 1.6. In order to identify genetic variants with only a direct effect on  
157 the phenotype of interest we defined the corrected to uncorrected ratio (CUR) as the ratio  
158 between the corrected and the uncorrected effects (see additional methods 1.7 for a detailed  
159 explanation).

160 **Fig. 1 Direct and indirect SNP effects.** The plot shows the causal path of exemplar genes identified for cheese consumption.  
161 In the multivariable MR model cheese consumption is causally influenced by educational attainment (EDU), low density  
162 lipoprotein cholesterol levels (LDL) and systolic blood pressure (SBP). The effect of PDCH17 is mediated through  
163 educational attainment, while SIX3 has a direct effect on cheese consumption. The mediated effects cannot be used reliably  
164 as MR instruments as they could be affecting either consumption or its reporting. Moreover, they could act as confounders

165 *in the MR analysis and thus they need to be identified.*

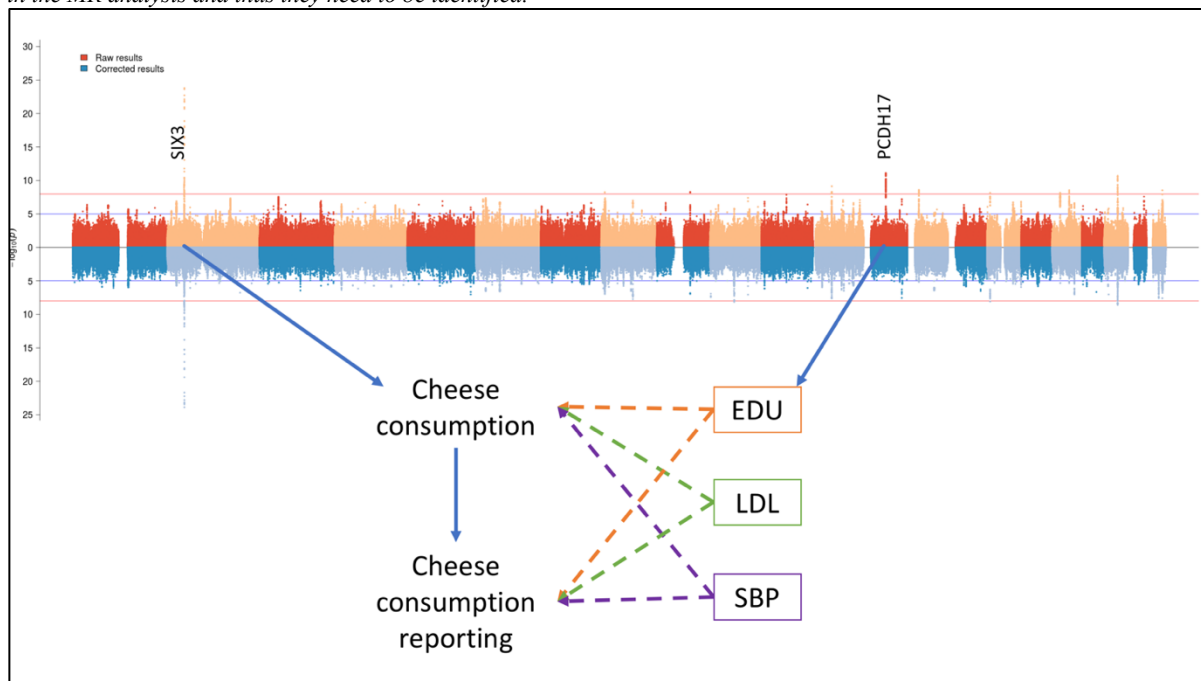

166  
167 The threshold to define genetic variants with non-mediated effects ( $CUR=1\pm 0.05$ ) is based on  
168 simulations provided in the supplementary note 2.1 and on the genetic variants with known  
169 biological function (ie. bitter receptors). We defined as “non-mediated” those SNPs whose  
170 CUR fell within the defined ranges while “uncertain” the others. We applied bGWAS to all  
171 29 food phenotypes. As potential mediators, we used the same cardiometabolic phenotypes as  
172 before except total cholesterol to avoid collinearity issues with LDL and HDL cholesterol,  
173 and we added summary statistics from Crohn’s disease and ulcerative colitis as they are  
174 likely to affect dietary patterns. A Detailed discussion of this approach can be found in  
175 supplementary methods 1.6.

176 **Genome-wide genetic correlations between corrected dietary intake and health**  
177 **outcomes.**

178 We used LD-score regression implemented in LD Hub<sup>13,14</sup> to estimate genome-wide genetic  
179 correlations between dietary intake phenotypes and 844 health outcomes and intermediary  
180 phenotypes. Genetic correlations were estimated both with the corrected and uncorrected  
181 GWAS summary statistics using the bivariate LD-score regression model. Stratified LD-



182 score regression<sup>22</sup> analyses were implemented using ldsc and the annotation files available on  
183 the ldsc website.

#### 184 **Definition of food group variables**

185 In order to define measures of dietary patterns we first performed cluster analysis of the 29  
186 food items applying iCLUST<sup>23</sup> to the corrected genetic correlation matrix between the  
187 different foods. iCLUST clusters items in different groups based on a hierarchical structure  
188 (Details additional methods 1.8). Figure 2 shows the resulting dendrogram and its  
189 comparison with the genetic correlation matrix.

190  
191  
192  
193  
194  
195  
196  
197  
198  
199  
200  
201  
202  
203  
204  
205  
206  
207  
208  
209  
210  
211  
212  
213  
214  
215  
216  
217  
218  
219  
220  
221  
222  
223  
224  
225  
226  
227  
228  
229  
230  
231  
232

233 **Fig2 Clustering of the food traits and definition of measures of dietary patterns.** The plot reports the genetic correlation  
 234 plot amongst the food traits after applying the correction. The stars report the Bonferroni-corrected significant correlations.  
 235 The dendrogram and the boxes represent the clustering according to the ICLUS algorithm. The labels on the dendrogram  
 236 branches show the traits used to define each measure of dietary pattern. The dashed line represents the traits excluded from  
 237 the estimation of the dietary patterns traits. The “Vegetarian” trait was excluded from the “Meat PC” trait but was included  
 238 in the overall dietary pattern measure (All PC).

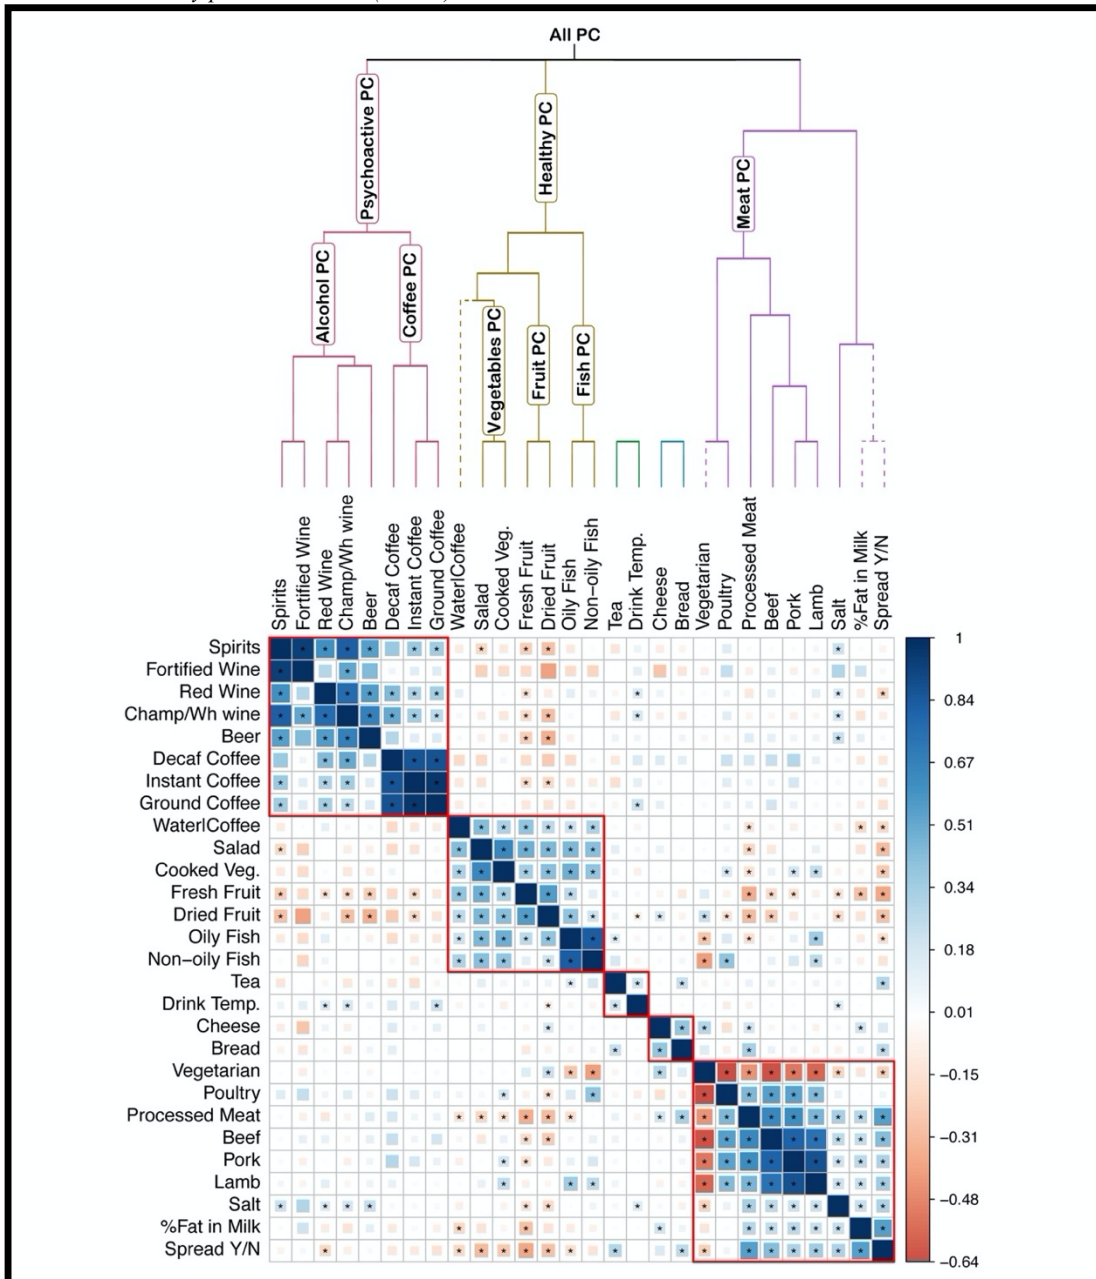

239 We then defined based on the resulting structure several measures of dietary pattern at  
 240 different levels of the dendrogram as shown in Figure 2. For each measure we performed  
 241 principal component analysis of the items which participated to each group. The rotation  
 242 matrix was derived from the eigen decomposition of the correlation matrix of the foods in the  
 243 PC trait of interest. For example for the Coffee PC measure we performed principal  
 244

245 component analysis of “Ground Coffee”, “Instant Coffee” and “Decaf Coffee”. Once the  
246 rotation matrix was estimated for each SNP its effect on the new measure was estimated as  
247 the linear combination of the effect on each food trait using as weights the loadings on each  
248 PC. A correlation plot of the loadings of each item onto the PC traits can be found in figure  
249 S3.

### 250 **MR analyses to assess causal relationships between food intake and health outcomes**

251 MR analyses were conducted to estimate the effects of the food phenotypes on 79 health  
252 related phenotypes (see table S17 for details) available in MR-base.<sup>17</sup> Genetic instruments for  
253 each exposure of interest included independent genetic variants ( $p < 5 \times 10^{-8}$  and pruning for  
254 LD ( $r^2 < 0.001$ )). For dietary patterns exposures SNPs were selected as outlined in additional  
255 methods 1.12. For the main analysis we restricted the genetic instruments to those that only  
256 had evidence of a direct effect (i.e., not affecting the main exposure through a different  
257 pathway; CUR  $1 \pm 0.05$ ). Discussion of the relationship with other methods can be found in  
258 supplementary note 2.7. Weights for the genetic instruments were based on the uncorrected  
259 effects. To verify the effects of using only direct effect only SNPs on MR, all the analyses  
260 were also conducted without applying the CUR filtering.

261 After selecting the genetic instruments, exposure and outcome data were harmonised. The  
262 MR estimates were tested for heterogeneity and outliers were removed using the MR-Radial  
263 method.<sup>24</sup> MR analyses were based on the inverse variance weighted method, which  
264 estimates the causal effect of an exposure on an outcome by combining ratio estimates using  
265 each variant. A random effect model was used if significant heterogeneity between the  
266 different estimates was detected. We then tested for the presence of directional pleiotropy  
267 using the intercept from the MR-Egger regression. MR median and MR-Raps were used as  
268 sensitivity analyses. All results have been made available through an online app (  
269 [https://npirastu.shinyapps.io/Food\\_MR/](https://npirastu.shinyapps.io/Food_MR/)) and can be found in additional table S18.

## 270 Patient and public involvement

271 This research did not involve patients or the public as it uses data from the UK Biobank study  
272 that were previously obtained from a cohort of people who had already been recruited. As  
273 such, no patients or member of the public were involved in the design or implementation of  
274 this study or the research questions addressed.

## 275 Results

### 276 Genetic variants associated with food intake

277 In a GWAS of 29 food phenotypes we identified 414 genetic associations in 260 independent  
278 loci (Fig 3 and additional table S4) at Bonferroni corrected level of significance ( $P < 1 \times 10^{-8}$ ).

279 **Fig. 3 302 independent genomic loci associate with food choices.** Results for both univariate (260 loci) and multivariate  
280 (additional 42 loci see paragraph S2.3) analyses are included. For each SNP the lowest p-value for all traits was plotted.  
281 The upper panel represents the unadjusted GWAS associations while the lower panel represents the association with food  
282 choices, after adjustment for mediating traits, such as health status.

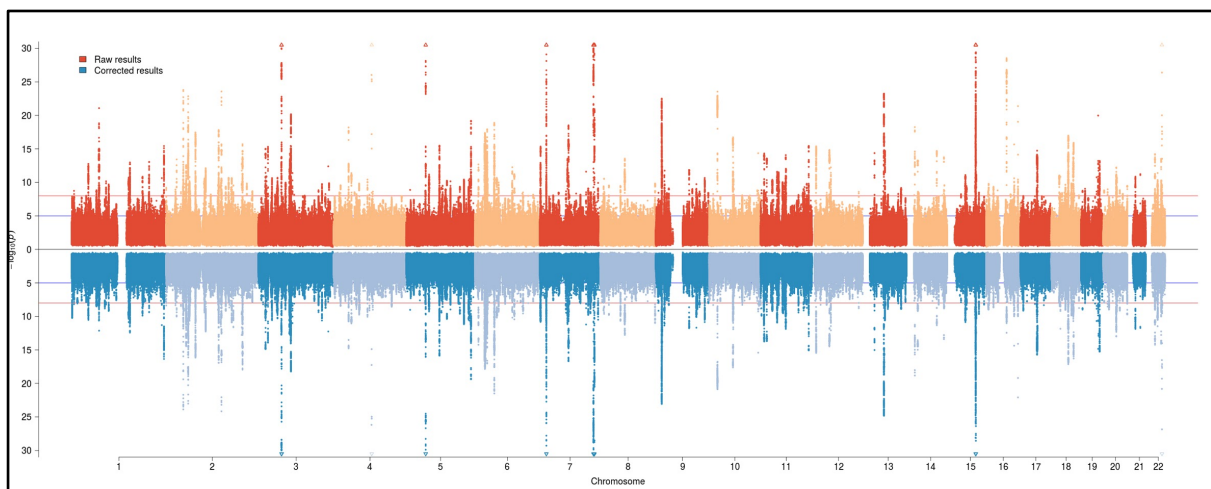

283

284 Replication was sought in two additional UK-based cohorts including up to 32,779  
285 participants. Despite relatively limited power in replication cohorts, concordant direction of  
286 effect was observed for 82% of the signals ( $p=7.82 \times 10^{-35}$ , Binomial test; Table S5), and  
287 nominal significance was achieved by 32% of the signals ( $p=9.47 \times 10^{-54}$ ). Gene prioritization  
288 is described in supplementary methods 1.10 while biological annotation, network analysis  
289 and tissue enrichment analysis are discussed in additional paragraphs 1.11, 2.4 and 2.5.

290 Several of the identified loci have been previously associated with BMI. However, contrary  
291 to our expectations, the BMI-raising allele was consistently associated with lower reported  
292 consumption of energy-dense foods such as meat or fat, and higher reported intake of low-  
293 calorie foods.

294 **Genetic variants associated with food intake are strongly influenced by other**  
295 **phenotypes**

296 In univariable MR we identified 81 instances in which health-related traits significantly  
297 influencing food intake (Fig. 4 additional table S7). In particular BMI and Educational  
298 attainment influenced more than 50% of the food traits. Similar effects extend to a broad  
299 range of traits, for example LDL and triglycerides influenced 15 and 18 traits respectively.  
300 Higher genetically-determined CAD associates with higher consumption of fish and red  
301 wine, and lower consumption of whole milk, salt and lamb. These findings suggest that some  
302 of the signals identified in GWAS for reported food phenotypes are not directly associated  
303 with food intake but are mediated through a wide range of potential confounders.

304  
305  
306  
307  
308  
309  
310  
311  
312  
313  
314  
315  
316  
317  
318  
319  
320  
321

322

323 **Fig 4. Health status influences reported food choices.** The plot reports only the univariable MR results which were  
 324 significant at  $FDR < 0.05$ . For each food outcome the effect estimate ( $\beta$ ) is reported in standard deviations of the exposure  
 325 trait, together with 95% confidence intervals. Each colour represents a different exposure. BMI, body mass index; CHD,  
 326 coronary heart disease; DBP, diastolic blood pressure; HDL, high density lipoprotein cholesterol; LDL, low density  
 327 lipoprotein cholesterol; TotalC, total cholesterol. Champ/Wh wine, champagne, white wine. Temp, temperature.

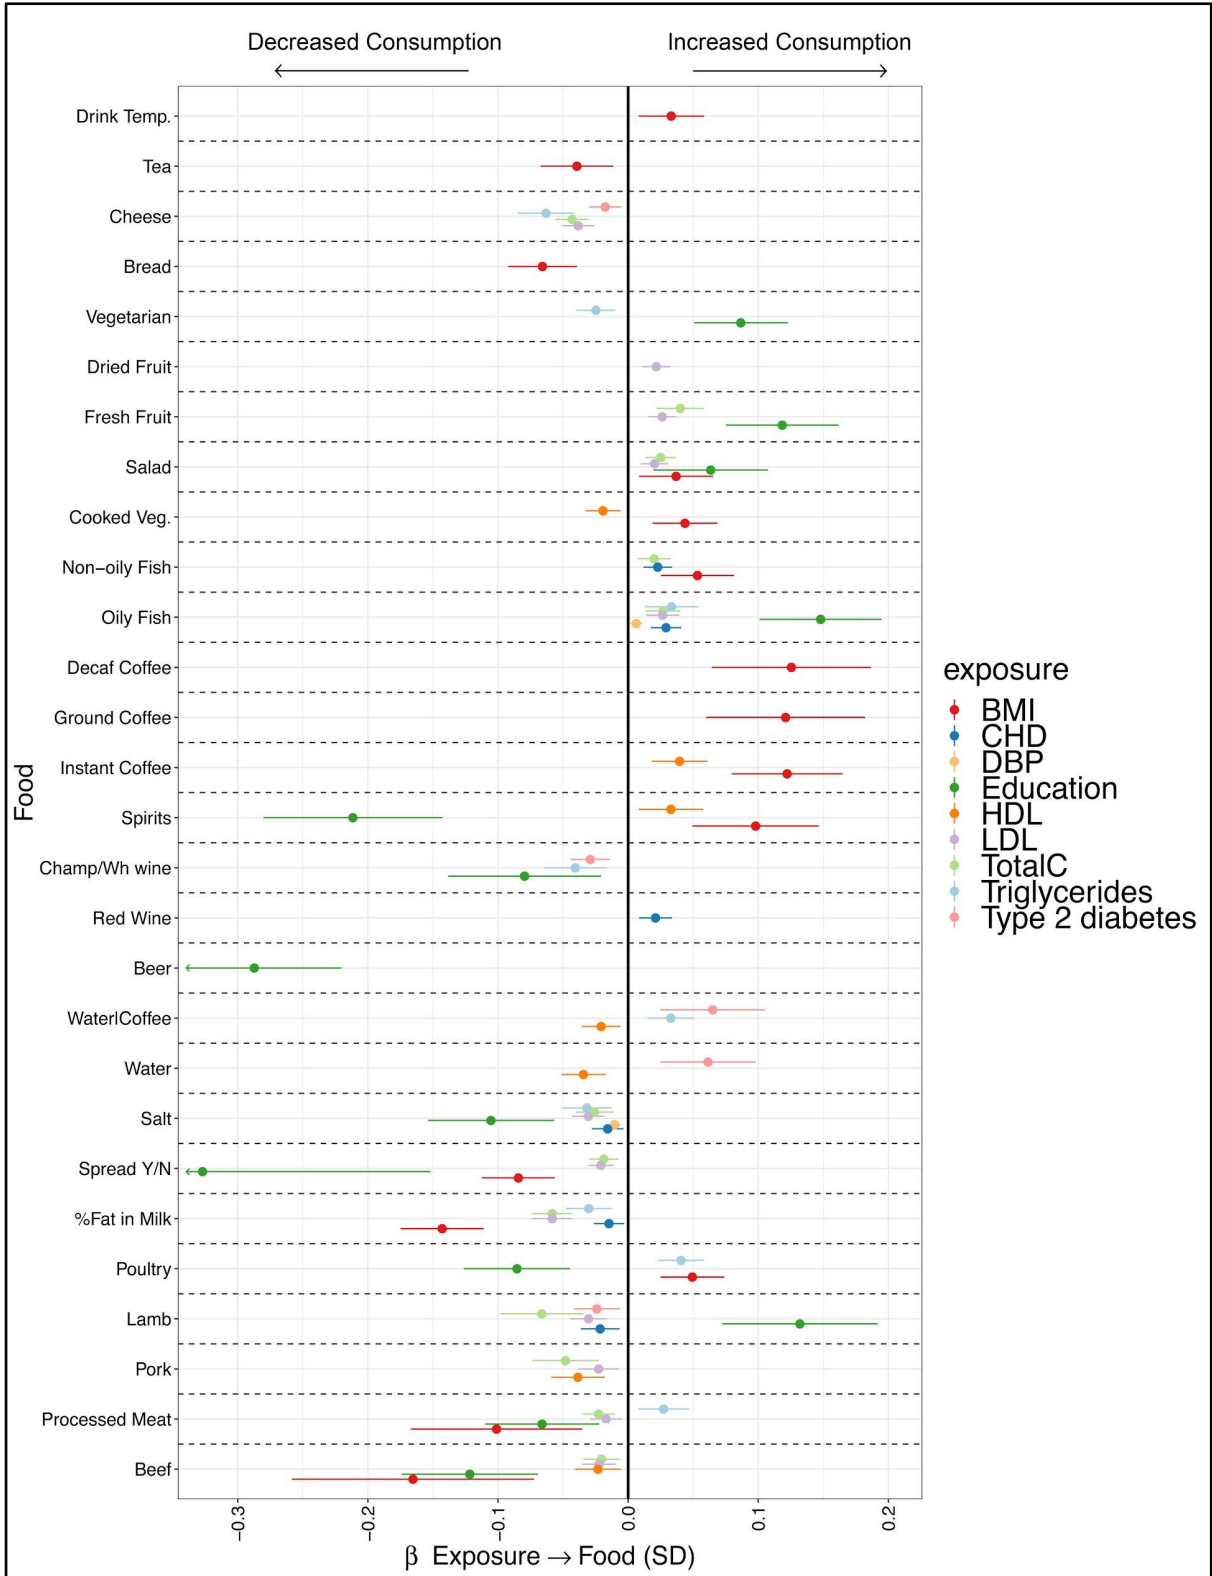

328

329 The Multivariable MR confirmed the univariable MR results (Supplementary Fig S4 panel A  
330 and Supplementary Table S8). The percentage of genetic variance for the reported food  
331 phenotypes explained by health determinants ranged from 42% for cheese to ~0% for  
332 fortified wine and white wine/champagne (Supplementary Fig S3 panel B and Supplementary  
333 Table S16). We systematically compared the estimated effect sizes of each genetic variants  
334 influencing food consumption before and after correcting for the effect of health determinants  
335 and showed that in many loci the variant initially identified for food phenotypes changed  
336 dramatically after taking into account the effect of health factors (Fig. 3, see Supplementary  
337 file 1 for trait-specific plots). For example, the effect size of the lead *FTO* variant  
338 (rs55872725,  $p=2 \times 10^{-29}$ ) on milk fat percentage chosen decreased three-fold after accounting  
339 for the mediated effects. To further explore the magnitude of this indirect effect on food  
340 intake phenotypes, we compared the correlation patterns between the 29 food phenotypes and  
341 832 phenotypes present in the LD hub<sup>14</sup> database identifying great differences. For example,  
342 low fat milk intake was correlated with a beneficial effect on body fat percentage ( $r_G = -0.43$ )  
343 but this association diminished to near zero ( $r_G = -0.04$ ) after accounting for indirect effects  
344 (Supplementary Data 2.2 and additional table S10). The effects of the correction procedure  
345 on the genetic correlation amongst the traits and with the 844 health traits are discussed in  
346 supplementary note 2.2 while full results can be found at in table S9 and browsed at  
347 [https://npirastu.shinyapps.io/rg\\_plotter\\_2/](https://npirastu.shinyapps.io/rg_plotter_2/). These findings highlight the relevance of biases  
348 and confounding in genetic correlation studies, and provide the framework to study complex  
349 physiological relationships.

### 350 **Causal inference analyses for diet phenotypes and health outcomes**

351 A total of 230 out of 414 genetic variants initially associated with food phenotypes  
352 (corresponding to 169/260 loci) were categorized as “non-mediated” associations (Table S3).  
353 The balance of uncertain to non-mediated genetic associations varied by food group, ranging

354 from none uncertain for tea, spirits and processed meat, to all uncertain for percentage fat in  
 355 milk and adding spread to bread (Table S3).  
 356 In two-sample MR analyses we found 141 significant associations between food phenotypes  
 357 and health outcomes after multiple test correction (pFDR < 0.05, Table S18).  
 358 Of these 89 showed no sign of heterogeneity amongst the estimates (heterogeneity test p  
 359 >0.05). Figure 5 reports full results for all significant food exposure trait outcome pairs.

360 **Fig 5. Significant effects of food choice on disease related traits.** The heatmap reports the results for all significant food  
 361 trait exposure trait outcome. Only dietary pattern exposures summarising the overall group consumption (PC1) have been  
 362 reported. All exposures have been aligned to have a positive loading onto the “overall unhealthy diet” measure. Significant  
 363 food/trait association are indicated with \* if they show no sign of heterogeneity while @ if they show significant  
 364 heterogeneity. To facilitate meaningful visualisation and maximise the appearance of signal rather than noise, we applied a  
 365 shrinkage method - imposing a bayesian prior assumption on the distribution of beta (mean 0, SD 0.1), and conjugating that  
 366 with the likelihood of our results and then taking mean beta from the resulting distribution, thus shrinking estimates with  
 367 larger SEs more towards 0. Abbreviations: BMI Body Mass Index, WHR Waist to Hip Ratio, TRY tryglicerides, TC total  
 368 cholesterol, HDL HDL cholesterol, LDL LDL cholesterol, Hb% Haemoglobin percentage, MCV Mean Corpuscular Volume,  
 369 MPV Mean Platelet Volume, PLT Platelet count, Edu Educational attainment, CHD Coronary Heart Disease, MI  
 370 Myocardial Infarction, CD Chron’s Disease, IBD Inflammatory Bowel Disease, Serous ovarian cancer:LG/LP low grade  
 371 low potential. H/L serous ovarian cancer High and Low grade serous ovarian cancer, RA Rheumatoid Arthritis.

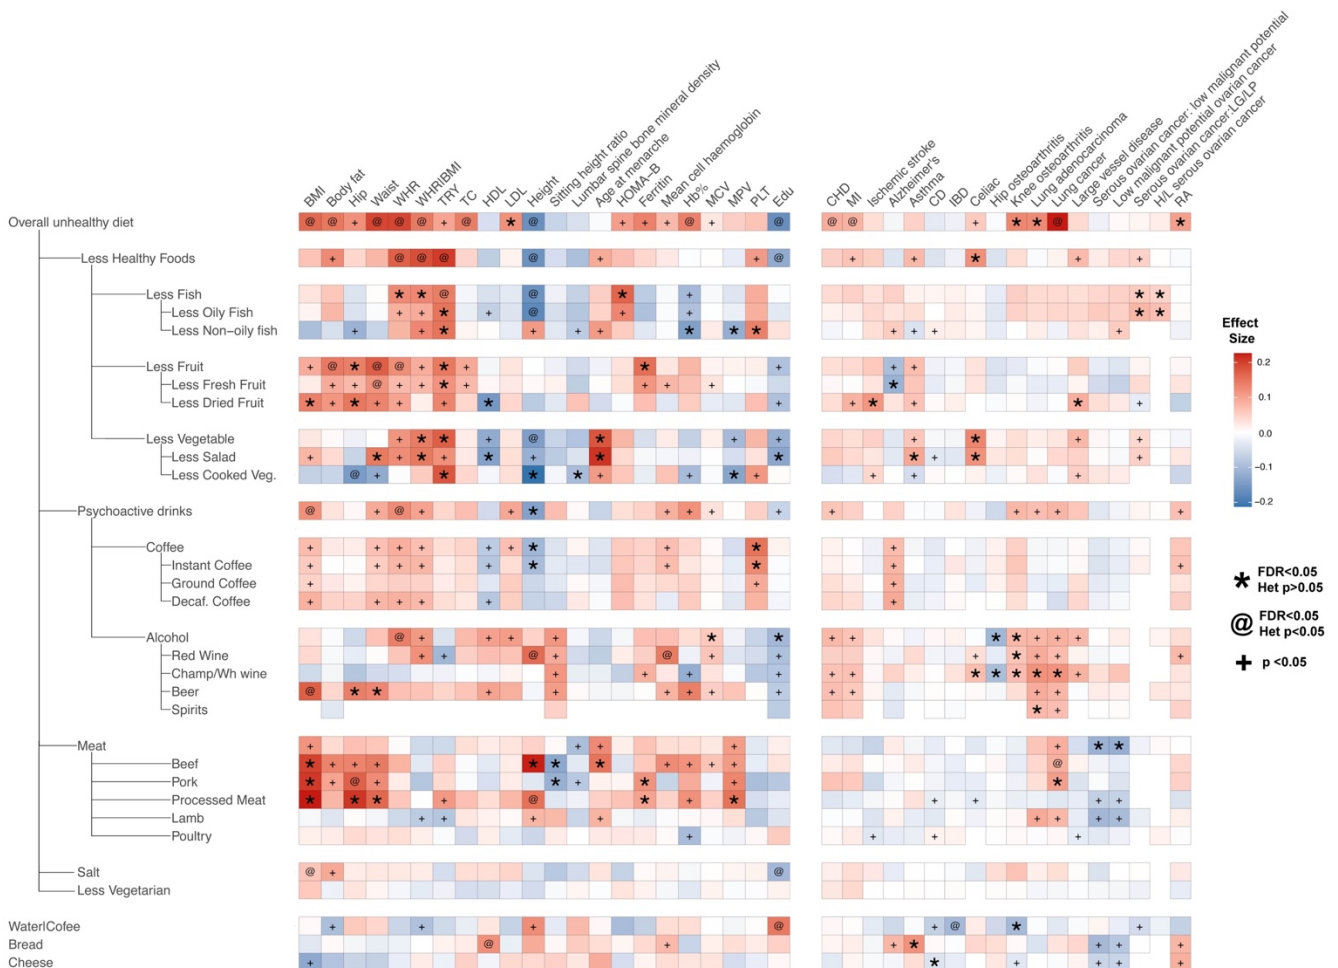

372



373 Overall we found evidence supporting the beneficial effect of a healthy diet on health  
374 outcomes. For example, for obesity/adiposity outcomes, genetically-determined unhealthy  
375 diet leads to very similar effects across, increasing obesity measurements. For lipid-related  
376 outcomes, the overall unhealthy diet is associated with higher levels of LDLc with no  
377 significant heterogeneity, but no association with any of the other dietary traits. The overall  
378 unhealthy diet was also strongly associated with Lung adenocarcinoma (OR 1.4xSD CI 1.2-  
379 1.9) which seemed to be driven mostly by alcoholic beverages.

380 We identified 51 instances in which we would have not detected a significant result without  
381 filtering out the non-direct effect instruments such as the effect of increased fruit  
382 consumption on triglycerides levels (estimated uncorrected effect= -0.03 (SE=0.05) vs.  
383 estimated corrected effect = -0.17 (SE=0.05) ) or the effect of increased beef consumption on  
384 height (uncorrected effect = -0.02 (-0.17, 0.13) vs corrected effect = -0.52 (0.29, 0.74). In  
385 addition, we found 124 food/trait relationships which were not significant after applying  
386 CUR filtering, showing that either confounding effects or reduced power explain the lack of  
387 association (see additional note 2.6). For example, red wine consumption was initially  
388 associated with increased BMI (uncorrected effect =0.22 (SE 0.05)) and waist circumference  
389 (uncorrected beta= 0.26 (SE 0.07), but after correcting for CAD liability, both effects  
390 disappeared (corrected effect for BMI 0.05 (SE 0.06), corrected effect for WC 0.005 (0.08)).

391 On the flip side, we showed that the effect of red wine on mean corpuscular volume remains  
392 substantially unchanged when applying the filtering approach (beta 0.07 (SE 0.02)  
393 uncorrected and 0.065 (SE 0.02) corrected), suggesting that our approach could precisely  
394 identify relevant biological relationships.

395 A full description of our findings are found in table S18 and have been made available  
396 through an online app ( [https://npirastu.shinyapps.io/Food\\_MR/](https://npirastu.shinyapps.io/Food_MR/)).

397

## 398 **Discussion**

399 In this study we have provided quantitative data about the complex interplay between diet  
400 and health outcomes showing that the causal path from food intake to adverse health  
401 outcomes is not unidirectional and may be influenced by reverse causation and confounding  
402 even when MR is used. We showed that genetic correlations and causal inference can be  
403 improved by leveraging statistical approaches that take into account this mediated effects and  
404 identify genetic variants that have a only non-mediated effects on the exposure of interest.  
405 This information allowed us to perform causal inference analyses that helped identifying  
406 more reliable potential causal effects of food on health outcomes.

## 407 **Results in context**

408 Previous MR studies have mainly focused on specific food groups such as coffee, alcohol and  
409 milk consumption while none has comprehensively investigated the role of different food  
410 groups on health outcomes. Our results support previous observations such as the effect of  
411 alcohol consumption on coronary artery diseases reported in previous MR studies. In  
412 addition, we were able to confirm similar previous results detecting no evidence of an effect  
413 on IBD and CD<sup>25</sup>, ovarian cancer<sup>26</sup> or rheumatoid arthritis<sup>27</sup>.

414 Findings from this study also suggest that the same biases that affect measures of food  
415 consumption such as reporting bias, confounding and reverse causation are reflected also in  
416 studies focusing on genetic associations. We have shown that these issues extend beyond  
417 obesity and socio-economic status including a broader range of intermediate factors. For  
418 example blood LDL and triglycerides concentration influence a wide variety of food traits  
419 thus being important factors to be considered as potential sources of bias, yet to our  
420 knowledge this is the first time this has been reported. For our analyses we have used UK  
421 biobank in which participants were aged between 40 and 60 at the time of the questionnaire,

422 it is likely that a younger cohort will suffer less from some of these (ie. LDL cholesterol or  
423 blood pressure) as it is unlikely that they will display pathological level of these traits.  
424 Our results are in contradiction to some previous studies in which no evidence of reverse  
425 causation influencing genetic susceptibility for dietary patterns was reported.<sup>28,29</sup> We believe  
426 that this difference is due to our novel approach, which is not based on using the potential  
427 mediators as covariates, but rather exploits MR, which should be able to distinguish the  
428 forward and reverse effects when the causal relationship is bidirectional. We have thus shown  
429 that it is possible, through the use of available data and methods, to disentangle these  
430 different colliding effects and to select the instrumental variables which show a non-mediated  
431 effect, thus enabling the use of MR for the assessment of causal relationships between food  
432 and health.

433 Many studies have looked at the relationship between nutritional composition and health  
434 outcomes. One of the most salient examples is the relationship between saturated fat intake  
435 and cardiovascular disease and all-cause mortality, in which recent studies suggest that food  
436 sources of saturated fatty acids are more important than saturated fat content per se<sup>[Citation error]</sup>.  
437 Our study provide a new angle on the importance of food sources by providing evidence that  
438 foods with similar nutrient profile, for example cheese and meat, which are both relatively  
439 high in saturated fat and protein, have opposite effects on some metabolic risk factors such as  
440 BMI (Figure S24 A) but there is no difference in other phenotypes such as blood lipids. A  
441 similar conclusion can be drawn if we look at the foods which have the greatest effect on  
442 triglycerides, fruit, vegetables and fish; all with very similar lowering effects (Figure S24 B),  
443 which have relatively different macronutrient compositions. While the findings require  
444 further investigations in mechanisms and related behaviours, our genetic evidence lends  
445 support for the importance of studying foods in their complexity and not as a mere mixture of  
446 nutrients. This approach, in fact, does not consider that the sources of the nutrients are not

447 equal due to the food matrix, the different preparations and that foods are seldom consumed  
448 by themselves but in patterns which are likely to modify the effects on health.

449 Our findings illustrate that the effect of diet on health outcomes is complex, and components  
450 of specific food groups have a differential association with health. In this case, although fish  
451 and fruit and vegetables have a very different macronutrient composition it was impossible to  
452 separate their effect on triglyceride concentrations. This suggests that at least in this case the  
453 macronutrient composition is not as important as the an overall tendency to eat certain foods  
454 and it highlights the importance of always including the assessment of dietary patterns before  
455 claiming health effects of single foods or nutrients.

456 Some of the effects we have identified are more complex to explain and will need different  
457 sources of evidence to be understood. For example we have found that the overall unhealthy  
458 diet is associated to a higher risk of both lung adenocarcinoma and lung cancer. When  
459 looking more closely to which of food explain this association the most we can see that  
460 Alcohol seems to be driving the overall effect. One possibility is that this relationship is  
461 confounded by smoking through a common tendency to addictive behaviours. However a  
462 recent GWAS on cigarette smoking in Japan Biobank<sup>30</sup> reported a strong association between  
463 the ALDH2 gene and number of cigarettes per day smoked which has also been associated to  
464 differences in alcohol consumption<sup>31</sup>, suggesting a causal effect of increased alcohol  
465 consumption on increased smoking thus predisposing to lung cancer. Regardless of the  
466 interpretation this example shows how complex the interpretation of MR results are when  
467 behavioural traits are involved as they influence each other constantly creating a complex net  
468 of interrelationships. This also points to the need of extreme care when claiming beneficial  
469 health effects of food and multiple sources of evidence and approaches should always be  
470 used before translating these findings into public policies.

471 Our study has several potential limitations. First, the number of items available in the dietary  
472 questionnaire in the UK BioBank is limited, and therefore it limited our ability to capture  
473 overall diet or specific food groups not detailed. The inclusion of white and relatively healthy  
474 and educated participants from UK Biobank may have limited the generalisability of our  
475 findings. Estimated effect sizes could be inflated because of the underestimation of the SNP  
476 effects on the actual food trait consumption, rather than its self-report, if so, this will have  
477 inflated our estimates of the effects of food on health, due to the noise in the questionnaire  
478 responses, and warrants further statistical investigations. Even so, our method should not  
479 have falsely identified a causal effect or reversed its direction, but further studies are needed  
480 to assess the precise effect sizes.

481 In conclusion, our findings show that overall what is generally considered a healthy diet leads  
482 to many favourable health outcomes and to reducing a wide range of risk factors broadly  
483 agreeing with current guidelines aimed at reducing meat and alcohol consumption while  
484 increasing fruit vegetables and fish. We also show that some of these effects are mostly  
485 reductable to specific food or group of foods which however are not characterized by  
486 common nutrient composition thus adding granularity to our knowledge on the effect of diet  
487 on health. This information can be useful to inform the design and implementation of future  
488 studies to reduce the burden of diet-related diseases.

#### 489 **Author Contributions**

490 NP,JFW,JRBP,ZK,EJG,FRD,KKO contributed to the study design.

491 JFW,TE,JRBP,AR,TG,FI,KKO,FRD contributed data.

492 NP,CMD,EJG,NM,FI,JZ,NT,KAK,MPC, performed the statistical analyses. NP, JFW,ZK,

493 JRBP, JM,TE, NT,KF,CMD,LR,EJG,FI,KKO,FRD contributed to the interpretation of the

494 results. All authors contributed to writing and editing of the text.

## 495 **Acknowledgements**

496 J.F.W. acknowledges support from the MRC Human Genetics Unit quinquennial programme  
497 grant “QTL in Health and Disease” (MC\_UU\_00007/10). This research has been conducted  
498 using the UK Biobank Resource under Application Number 19655. We would like to thank  
499 Professor George Davey Smith for the precious feedback, Erin MacDonald-Dunlop, and  
500 Pascale Lubbe for help with statistical analyses and Dr. Nana Matoba for providing the  
501 results from the smoking GWAS.

502 EGCUT was funded by Estonian Research Council Grant IUT20-60, PUT1660 (T.E.),  
503 PUT1665 (K.F.), the European Union through the European Regional Development Fund  
504 grant no. 2014-2020.4.01.15-0012 GENTRANSMED and 2014-2020.4.2.2, and Estonian and  
505 European Research Roadmap grant no.2014-2020.4.01.16-0125. The EPIC-Norfolk study  
506 (DOI 10.22025/2019.10.105.00004) has received funding from the Medical Research Council  
507 (MR/N003284/1, MC-PC\_13048, and MC-UU\_12015/1). The Fenland study (DOI:  
508 10.1186/ISRCTN72077169) was funded by the Medical Research Council and the Wellcome  
509 Trust (Ref: 074548). J.P., K.O., F.I., and F.R.D. were funded by the UK Medical Research  
510 Council Epidemiology Unit core grant (MC-UU\_12015/2, MC\_UU\_12015/5). T.R.G.  
511 receives funding from the UK Medical Research Council (MC\_UU\_00011/4). Z.K. received  
512 funding from the Swiss National Science Foundation (31003A\_169929). We are grateful to  
513 all the participants who have been part of the project and to the many members of the study  
514 teams at the University of Cambridge who have enabled this research. J.M. was partially  
515 supported by a fellowship funded by the European Commission Horizon 2020 program  
516 (H2020-MSCA-IF-2015-703787) and by the National Institutes of Health grant P30  
517 DK40561

518

519 **Data Availability**

520 All GWAS results will be made available through GWAS catalog at the time of publication.

521 All results from the MR analyses have been shared in the additional tables.

522

523 **References**

524 1. Misra, A. & Khurana, L. Obesity and the Metabolic Syndrome in Developing Countries.

525 *The Journal of Clinical Endocrinology & Metabolism* vol. 93 s9–s30 (2008).

526 2. Naska, A., Lagiou, A. & Lagiou, P. Dietary assessment methods in epidemiological

527 research: current state of the art and future prospects. *F1000Res.* **6**, 926 (2017).

528 3. Berry, S. E. *et al.* Human postprandial responses to food and potential for precision

529 nutrition. *Nat. Med.* **26**, 964–973 (2020).

530 4. Zheng, J. *et al.* Recent Developments in Mendelian Randomization Studies. *Curr*

531 *Epidemiol Rep* **4**, 330–345 (2017).

532 5. Millwood, I. Y. *et al.* Conventional and genetic evidence on alcohol and vascular disease

533 aetiology: a prospective study of 500 000 men and women in China. *Lancet* **393**, 1831–

534 1842 (2019).

535 6. Cornelis, M. C. & Munafo, M. R. Mendelian Randomization Studies of Coffee and

536 Caffeine Consumption. *Nutrients* **10**, (2018).

537 7. Bergholdt, H. K. M., Nordestgaard, B. G., Varbo, A. & Ellervik, C. Milk intake is not

538 associated with ischaemic heart disease in observational or Mendelian randomization

539 analyses in 98,529 Danish adults. *Int. J. Epidemiol.* **44**, 587–603 (2015).

540 8. Vissers, L. E. T. *et al.* Dairy Product Intake and Risk of Type 2 Diabetes in EPIC-

541 InterAct: A Mendelian Randomization Study. *Diabetes Care* **42**, 568–575 (2019).

- 542 9. Hartwig, F. P., Horta, B. L., Smith, G. D., de Mola, C. L. & Victora, C. G. Association  
543 of lactase persistence genotype with milk consumption, obesity and blood pressure: a  
544 Mendelian randomization study in the 1982 Pelotas (Brazil) Birth Cohort, with a  
545 systematic review and meta-analysis. *Int. J. Epidemiol.* **45**, 1573–1587 (2016).
- 546 10. Sudlow, C. *et al.* UK biobank: an open access resource for identifying the causes of a  
547 wide range of complex diseases of middle and old age. *PLoS Med.* **12**, e1001779 (2015).
- 548 11. Loh, P.-R. *et al.* Efficient Bayesian mixed-model analysis increases association power in  
549 large cohorts. *Nat. Genet.* **47**, 284–290 (2015).
- 550 12. McCarthy, S. *et al.* A reference panel of 64,976 haplotypes for genotype imputation. *Nat.*  
551 *Genet.* **48**, 1279–1283 (2016).
- 552 13. Bulik-Sullivan, B. K. *et al.* LD Score regression distinguishes confounding from  
553 polygenicity in genome-wide association studies. *Nat. Genet.* **47**, 291–295 (2015).
- 554 14. Zheng, J. *et al.* LD Hub: a centralized database and web interface to perform LD score  
555 regression that maximizes the potential of summary level GWAS data for SNP  
556 heritability and genetic correlation analysis. *Bioinformatics* vol. 33 272–279 (2017).
- 557 15. Day, N. *et al.* EPIC-Norfolk: study design and characteristics of the cohort. European  
558 Prospective Investigation of Cancer. *Br. J. Cancer* **80 Suppl 1**, 95–103 (1999).
- 559 16. Lotta, L. A. *et al.* Integrative genomic analysis implicates limited peripheral adipose  
560 storage capacity in the pathogenesis of human insulin resistance. *Nat. Genet.* **49**, 17–26  
561 (2017).
- 562 17. Hemani, G. *et al.* The MR-Base platform supports systematic causal inference across the  
563 human phenome. *Elife* **7**, (2018).
- 564 18. Burgess, S., Butterworth, A. & Thompson, S. G. Mendelian randomization analysis with



- 565 multiple genetic variants using summarized data. *Genet. Epidemiol.* **37**, 658–665 (2013).
- 566 19. Bowden, J., Davey Smith, G. & Burgess, S. Mendelian randomization with invalid  
567 instruments: effect estimation and bias detection through Egger regression. *Int. J.*  
568 *Epidemiol.* **44**, 512–525 (2015).
- 569 20. Davies, N. M., Holmes, M. V. & Davey Smith, G. Reading Mendelian randomisation  
570 studies: a guide, glossary, and checklist for clinicians. *BMJ* **362**, k601 (2018).
- 571 21. Mounier, N. & Kutalik, Z. bGWAS: an R package to perform Bayesian Genome Wide  
572 Association Studies. *Bioinformatics* (2020) doi:10.1093/bioinformatics/btaa549.
- 573 22. Finucane, H. K. *et al.* Partitioning heritability by functional category using GWAS  
574 summary statistics. doi:10.1101/014241.
- 575 23. Revelle, W. Hierarchical cluster analysis and the internal structure of tests. *Multivariate*  
576 *Behav. Res.* **14**, 57–74 (1979).
- 577 24. Bowden, J. *et al.* Improving the visualization, interpretation and analysis of two-sample  
578 summary data Mendelian randomization via the Radial plot and Radial regression. *Int. J.*  
579 *Epidemiol.* **47**, 2100 (2018).
- 580 25. Georgiou, A. N., Ntritsos, G., Papadimitriou, N., Dimou, N. & Evangelou, E. Cigarette  
581 smoking, coffee consumption, alcohol intake, and risk of crohn’s disease and ulcerative  
582 colitis: A Mendelian randomization study. *Inflamm. Bowel Dis.* (2020)  
583 doi:10.1093/ibd/izaa152.
- 584 26. Zhu, J., Jiang, X. & Niu, Z. Alcohol consumption and risk of breast and ovarian cancer:  
585 A Mendelian randomization study. *Cancer Genet.* **245**, 35–41 (2020).
- 586 27. Jiang, X. & Alfredsson, L. Modifiable environmental exposure and risk of rheumatoid  
587 arthritis-current evidence from genetic studies. *Arthritis Res. Ther.* **22**, 154 (2020).

- 588 28. Meddens, S. F. W., de Vlaming, R., Bowers, P. & Burik, C. A. P. Genomic analysis of  
589 diet composition finds novel loci and associations with health and lifestyle. *bioRxiv*  
590 (2018).
- 591 29. Cole, J. B., Florez, J. C. & Hirschhorn, J. N. Comprehensive genomic analysis of dietary  
592 habits in UK Biobank identifies hundreds of genetic loci and establishes causal  
593 relationships between educational attainment and healthy eating. doi:10.1101/662239.
- 594 30. Matoba, N. *et al.* GWAS of smoking behaviour in 165,436 Japanese people reveals  
595 seven new loci and shared genetic architecture. *Nat. Hum. Behav.* **3**, 471–477 (2019).
- 596 31. Matoba, N. *et al.* GWAS of 165,084 Japanese individuals identified nine loci associated  
597 with dietary habits. *Nat. Hum. Behav.* **4**, 308–316 (2020).
