# Supplementary material for: Using genetic variation to disentangle the complex relationship between food intake and health outcomes
Source: bioRxiv or medRxiv preprint supplement (doi:10.1101/829952), 2020-12-14
Supplement: Supplementary file [file media-1.pdf]

## 1. Online Materials and Methods

### 1.1 Discovery population.

Analyses were conducted on data collected in the UK Biobank project<sup>31</sup> under project 19655. All subjects gave written informed consent. UK Biobank has approval from the North West Multi-Centre Research Ethics Committee (MREC), In Scotland, UK Biobank has approval from the Community Health Index Advisory Group (CHIAG). We included only subjects who completed the food frequency questionnaire and were defined by UK Biobank as genomically British and unrelated.

### 1.2 Phenotype modelling

Quantitative food and drink intake phenotypes were all converted to weekly consumption, e.g. consuming 3 cups of tea a day was converted to 21 cups/week. Semi-quantitative descriptors: never, 2-4 times a week, 5-6 times a week, once or more daily were converted to 0, 3, 5.5 and 7 respectively. All "Prefer not to answer" and "Do not know" answers were excluded from the analysis.

All coffee traits were stratified by type (instant, ground, decaffeinated) to account for differences in consumption patterns such as cup size and caffeine concentration. Participants who did not specify the type of coffee they usually consume were excluded from the analysis.

Coffee consumption (any type of coffee, including unspecified type of coffee) was treated as a covariate for water consumption due to a very high negative phenotypic correlation between water and coffee consumption. Some semi-quantitative traits do not directly refer to the amount of food or drink consumed but to its type. Fat content in milk was calculated as the fat percentage and non-dairy types of milk (e.g. soy) were removed. Drink temperature (very hot, hot and warm) were converted to an arbitrary 3-unit scale (3, 2, 1). People who did not report consuming hot drinks were excluded from the analysis. Summary statistics for the traits are reported in Supplementary data 10.

28 All traits including the binary ones were treated as being quantitative. For binary traits this is the  
29 same as running a trend test. We did this because standard software cannot perform logistic  
30 regression on such a large sample in a timely fashion. Residuals for each trait using a linear model  
31 were first estimated in R using age and sex and then used as phenotype for the association  
32 analysis using BOLT-LMM. Coffee and tea consumption were added as covariates for the analysis  
33 of water consumption as described before.

34 In order to verify the best function for trait normalisation in the association analysis and to ensure  
35 that most quantitative traits demonstrated a right-tailed distribution, we applied both  $\log_{10}(x+1)$  and  
36  $\sqrt{x}$  transformations to the traits and then regressed them against the covariates. The best  
37 transformation was chosen by visually inspecting the Q-Q plots of the residuals from these  
38 regressions and checking which one better approximated a normal distribution: in all cases the  
39 residuals were properly normalised. Supplementary data 3 gives full details of the phenotype  
40 modelling.

41

### 42 **1.3 Genome wide association study (GWAS).**

43 Association analyses were conducted on SNPs imputed to the HRC panel<sup>1</sup>, as provided by the UK  
44 Biobank, using BOLT-LMM<sup>2</sup>. Population stratification was assessed using LD-score regression as  
45 implemented in *ldsc*<sup>3</sup> both for both GWAS and after meta-analysis using the LD scores provided  
46 with the software: no evidence of residual stratification was observed. Table S15 reports the LD  
47 regression intercept and  $h^2$  estimation using *ldsc*. Given that we identified 5 main clusters of traits  
48 we set the genome-wide significance threshold at  $1 \times 10^{-8}$ .

49

### 50 **1.4 Replication Analysis**

51 Replication analyses were conducted independently by using genetic and dietary data from the  
52 EPIC-Norfolk Study<sup>4</sup> and the Fenland Study<sup>5</sup>. Both are on-going population based cohort studies  
53 conducted in the East of England. At baseline of the EPIC-Norfolk Study (1993-1997) and the  
54 Fenland study (2005-2015), the same food-frequency questionnaires (FFQs)<sup>4,6</sup> were administered  
55 to participants. Each participant was requested to report frequency of consumption of 131 food

56 items by selecting one of nine categories of frequency of food consumption ('never or less than  
57 once/month', '1-3 per month', 'once a week', '2-4 per week', '5-6 per week', 'once a day', '2-3 per  
58 day', '4-5 per day', and '6+ per day'). As performed in the analysis of the UK BioBank, the  
59 quantitative information on frequency of consumption was assigned to each response for 131 food  
60 items. We summed up frequencies of consumption of multiple food items in each food group (e.g.  
61 margarine and butter for bread spread; different types of vegetables for total vegetable  
62 consumption), so that resulting variables were comparable with those used in the UK BioBank.

63  
64 Participants were genotypes with different genotyping arrays. In the EPIC-Norfolk Study,  
65 Affymetrics Axiom UKBiobank was used (n=21,044). In the Fenland Study, three arrays were used:  
66 Affymetrics Axiom UKBiobank (n=8,994), Illumina MetaboChip (n=3,217), and Illumina ExomeChip  
67 v1.0 Human Exome-12v1-B (n=1,650). Further details are available elsewhere<sup>5</sup>. Missing  
68 information of SNPs was imputed to the HRC and UK10K panels by population and genotyping  
69 array. After we excluded participants without either dietary or genetic information, 32,779  
70 participants in total became available for the replication analysis of EPIC-Norfolk Study (n=21,337;  
71  $n_{\text{original}}=25,639$ ) and the Fenland Study (n=11,442;  $n_{\text{original}}=12,731$ ). Association analyses were  
72 conducted with BOLT-LMM in each of the four population-array strata.

73

## 74 **1.5 Univariate MR**

75 Univariate MR to measure the causal effect of health-related traits on food was conducted using  
76 the TwoSampleMR<sup>7</sup> R package. We decided to focus on traits for which dietary medical advice is  
77 given due to medical conditions in particular: body mass index (BMI), low density lipoprotein (LDL)  
78 Cholesterol, high density lipoprotein (HDL) Cholesterol, Total Cholesterol, Triglycerides, Diastolic  
79 and Systolic blood pressure, Educational attainment, Type II diabetes and Coronary Heart  
80 Disease. The full list of studies from which the summary statistics were derived is given in Table  
81 S6.

82 For each trait we selected all SNPs with  $p < 5 \times 10^{-8}$  and  $r^2 < 0.001$ . We then performed stepwise  
83 heterogeneity pruning, first estimating heterogeneity using the Q statistic, if  $p < 0.05$ , we removed

84 one SNP at a time, looking at which removal would improve the statistic more. This procedure was  
85 repeated until  $p > 0.05$ . We then tested if the intercept from the MR-Egger regression was different  
86 from zero ( $p < 0.05$ ). If this was the case, MR-Egger was used for the MR analysis otherwise the  
87 Inverse Variance method was used. We considered as significant those relationships in which the  
88 Benjamini and Hochberg FDR  $< 0.05$ .

89

## 90 **1.6 Estimation of prior expected effect through bGWAS and genome-wide mediation** 91 **analysis.**

92 One of the main issues in GWAS studies is to decide which covariates to apply in the regression  
93 model. When deciding to include a covariate or not, depending on the causal relationships  
94 between the traits, we may risk creating different types of biases. One approach could be to  
95 include in the model just the non-heritable covariates (i.e. sex and age) which will avoid spurious  
96 results due to collider bias. The problem with including heritable covariates is that the GWAS will  
97 also detect those SNPs which are associated with the covariates which are causally related to the  
98 trait, making the interpretation of the results harder. For example if educational attainment causally  
99 influences BMI, if the study is powered enough, it is possible that the genes from educational  
100 attainment show up on the BMI GWAS. Moreover, this limits the generalisability of at least part of  
101 the results to other populations in which the phenotypic architecture of the trait may be different.  
102 For example, following the previous example educational attainment was causal to the trait in the  
103 European population and not in East Asia the SNPs causal from Educational attainment will not be  
104 replicated in East Asian populations affecting also the generalisability of results.

105 It is thus extremely important to identify a technique which allows to distinguish between those  
106 SNPs which are directly causal of the trait of interest from those which are associated through  
107 other mediators.

108

109 There are 3 possible scenarios:

110 1) The covariate is causing the trait of interest in which case it would be correct to include it in the  
111 model (i.e. diet and socioeconomic status).

112 2) The trait of interest is causing the covariate in which case including the covariate in the model  
113 could result in collider biases.

114 3) The trait and the covariate are causing each other. In this case, using the covariate in a  
115 regression framework will correct for the overall effect while in truth we are interested in correcting  
116 only for the effect of the covariate on the trait and not vice versa.

117

118 So, in order to properly correct our analyses, we need to determine if a covariate is causing the  
119 trait of interest and at the same time estimate the size of the effect. In this respect, we can use  
120 two-sample MR to establish both causality and effect size, using a multivariable MR approach if  
121 there are multiple covariates. In principle, once this is done we can correct the phenotype given the  
122 covariates and run the GWAS based on this new corrected trait. However, given that in many  
123 cases information on covariates may be missing, a method which exploits available GWAS  
124 summary statistics would be more desirable. Such a method would need to first estimate which  
125 covariates are causal to the trait of interest and then based on their causal estimates, perform  
126 mediation analysis for each SNP. In the second step, for each SNP an expected mediated effect is  
127 estimated, combining the effect of the SNP on each of the causal traits with their multivariable  
128 causal effects. The expected effect can be subtracted from the observed effect on the trait of  
129 interest to get the “direct causal effect” of the SNP on the trait.

130

131 For the estimation of the prior expected effect, we used a Bayesian GWAS (bGWAS)<sup>8</sup>. The  
132 bGWAS approach leverages information from studies of related traits to carefully build informative  
133 priors for each SNP. To analyse food choices, we decided to include information from the same  
134 traits used for the univariate MR plus Crohn’s disease and ulcerative colitis. Given that the traits  
135 were meant to be used in a multivariable model, total cholesterol was removed to avoid strong  
136 collinearity with LDL and/or HDL cholesterol. MR was used to derive multivariate causal effects of  
137 the set of related traits on the different food choice phenotypes, using independent instruments  
138 (association p-value below  $5 \times 10^{-8}$  for at least one related trait, LD pruned  $r^2 < 0.001$ ). For each  
139 food choice phenotype, a stepwise selection approach was used to select only the related traits

140 significantly affecting the focal phenotype. To calculate the prior for SNPs on a given  
141 chromosome, we first apply multivariate MR (masking the focal chromosome) using the  
142 significantly related traits identified by the stepwise selection to estimate causal effects. We next  
143 use the causal effect estimates in combination with GWAS summary statistics of the related traits  
144 to estimate the prior effects. The prior effect of a SNP  $i$  ( $\hat{\mu}_i$ ) is calculated using the observed  
145 standardised effects (Z-scores) for the  $T$  different related traits ( $Z_{i,t}$ ) and the causal effects  
146 estimated masking one chromosome ( $\hat{\beta}_t$ ):

$$147 \quad \hat{\mu}_i = \sum_{t=1}^T Z_{i,t} \hat{\beta}_t (1)$$

148

149 The prior estimated by bGWAS is on the scale of the z-score of the GWAS from the trait of  
150 interest, so the non-mediated z-score can be easily then estimated as the difference between the  
151 original z-score and the prior. The prior can be thought of as the total indirect effect while the  
152 corrected effect as the pure direct effect from mediation analysis<sup>9</sup>. Keeping the standard error  
153 constant, it is then easy to derive the corrected beta as z-corrected\*se. It is important to note that  
154 when we estimate the prior expected effect we do not take into account the error of the  
155 multivariable estimates and we use the point estimates directly. This is because in MR the  
156 standard errors linked to each beta estimate are relatively large and if taken into account would  
157 lead to a very large final standard error and thus all pure direct effect estimates would have  
158 extremely large errors making them not usable. Although this is of course an approximation this is  
159 not unlike the estimation of polygenic risk scores where the SNP point estimates are used as  
160 weights for the score. It is important to note that for the further causal inference we used  
161 uncorrected betas and thus this will not influence the effect estimation.

162

163 This approach has several advantages compared to correcting the phenotype directly. First, it  
164 allows the GWAS to be corrected for covariates which have not been measured directly on the  
165 same samples. This is a great advantage in terms of the models that can be explored, for example  
166 in our case we have corrected the GWAS for LDL although LDL had not been measured in UK

167 biobank at the time of the analyses, and this is also useful for phenotypes such as Crohn's  
168 disease, for which relatively few cases are present in UKB.

169

170 Moreover, it is possible to compare the effects before and after correction, giving us information on  
171 the likelihood the observed effect is directly associated with the trait of interest or is mediated. It is  
172 important to remember that conditioning on a phenotypic covariate will not necessarily completely  
173 correct the mediated effect, due to noise, and thus the comparison of the two effects is more  
174 informative. Finally, we should be able to trace back the path of mediation looking at the different  
175 components of the prior for each SNP thus helping greatly in interpreting the results and planning  
176 subsequent studies.

177 All the exposure traits GWAS have been first imputed using SSimp<sup>10</sup>

178 ([https://github.com/zkotalik/ssimp\\_software](https://github.com/zkotalik/ssimp_software)) and the UK10K genotypes as the reference panel.

179 Finally, all A/T or G/C SNPs were removed to avoid errors in the harmonisation of effects coming  
180 from different GWAS, due to strand errors. The proportion of genetic variance of the food traits  
181 explained by the health-related traits was measured by taking the squared genetic correlation  
182 between the expected Z-score and the observed one.

183

#### 184 **1.7 Genetic correlations with other traits and stratified LD-score regression.**

185 Genetic correlations of the self-reported food consumption traits against 844 traits have been  
186 estimated using LD-score regression as implemented in LD Hub<sup>3,11</sup>. Genetic correlations were  
187 estimated both with the corrected and uncorrected traits using the bivariate LD-score regression  
188 model. Stratified LD-score regression<sup>12</sup> was run using ldsc and the annotation files available on the  
189 ldsc website.

190

#### 191 **1.8 Identification of the SNPs directly associated with the food traits.**

192 One of the main objectives of GWAS is to identify genes directly responsible for the trait of interest,  
193 in our specific case, however, we have shown that looking just at the genome-wide hits is not  
194 sufficient and does not exclude SNPs truly associated with other causal heritable traits, due to

195 vertical pleiotropy. In order to distinguish between these two types of SNPs, we decided to look at  
196 the ratio between the corrected trait and the original trait or corrected-to-raw ratio (CRR).

197 To understand this choice let's suppose we have a trait of interest (Y) and a second heritable trait  
198 (X) which is causal with effect,  $\beta_{X \rightarrow Y}$ . We will call SNP<sub>y</sub>, the SNPs directly causing Y with effect,  
199  $\beta_{SNP_y \rightarrow Y}$  and SNP<sub>x</sub>, the SNPs which are directly causing X with effect,  $\beta_{SNP_x \rightarrow X}$ . If the whole effect  
200 of SNP<sub>x</sub> on Y is mediated through X its effect will be given by

201

$$202 \beta_{(SNP_x \rightarrow Y)expected} = \beta_{SNP_x \rightarrow X} \times \beta_{X \rightarrow Y} \quad (2)$$

203

204  $\beta_{X \rightarrow Y}$  can be estimated through MR, while  $\beta_{SNP_x \rightarrow X}$  can be retrieved from the GWAS of X. Assume  
205 we measure the effect of a SNP for which it is unknown if the effect is mediated through X or not  
206 (as is the case in real data). We define  $\beta_{SNP \rightarrow Y}$ , the observed effect of the SNP on Y

207 if  $\beta_{SNP \rightarrow X}$  is truly 0, then we can estimate the expected mediated effect of the SNP through X as

$$208 \beta_{(SNP \rightarrow Y)expected} = \beta_{SNP \rightarrow X} \times \beta_{X \rightarrow Y} \approx 0 \quad (3)$$

209 and

$$210 \beta_{(SNP \rightarrow Y)corrected} = \beta_{SNP \rightarrow Y} - \beta_{(SNP \rightarrow Y)expected} \approx \beta_{SNP \rightarrow Y} \quad (4)$$

211 thus

$$212 CRR = \frac{\beta_{(SNP \rightarrow Y)corrected}}{\beta_{SNP \rightarrow Y}} \approx 1 \quad (5)$$

213

214 On the other hand if

$$215 \beta_{SNP \rightarrow X} \neq 0 \quad (6)$$

216 then

$$217 \beta_{(SNP \rightarrow Y)expected} = \beta_{SNP \rightarrow X} \times \beta_{X \rightarrow Y} \neq 0 \quad (7)$$

$$218 \beta_{(SNP \rightarrow Y)corrected} = \beta_{SNP \rightarrow Y} - \beta_{(SNP \rightarrow Y)expected} \neq \beta_{SNP \rightarrow Y} \quad (8)$$

219 then

$$220 CRR = \frac{\beta_{(SNP \rightarrow Y)corrected}}{\beta_{SNP \rightarrow Y}} \neq 1 \quad (9)$$



221 **Figure S1. Directed acyclic graph explaining the two possible scenarios for the effect of a SNP on the trait of**  
 222 **interest Y. (a) The SNP has a direct effect on Y not mediated through X. Then the estimated effect of SNP on X will be**  
 223 **normally distributed around 0, thus the corrected and uncorrected effects will be similar and their CRR will be close to 1.**  
 224 **(b) The SNP effect is mediated through X, thus the corrected effect will deviate from the observed one and CRR will**  
 225 **deviate from 1.**

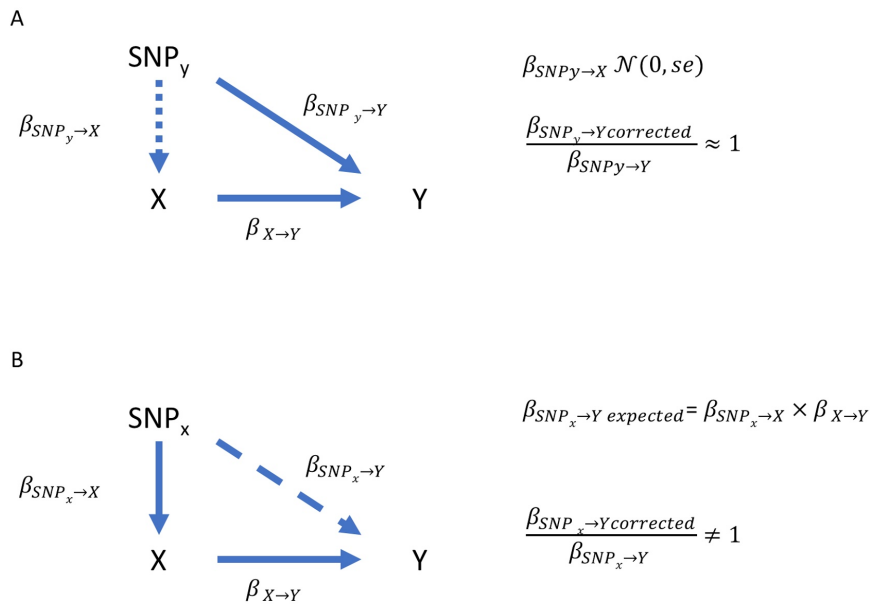

226

227 In real-life situations, the betas are estimated and thus will carry an error due to chance and it is  
 228 thus important to understand what values the CRR may assume under different scenarios. We  
 229 can, however, summarise three types of relationship between the trait of interest and its causal  
 230 factors:

- 231 1)  $X \rightarrow Y$
- 232 2)  $X \rightarrow Y$  and  $Y \rightarrow X$
- 233 3)  $U \rightarrow Y$  and  $U \rightarrow X$

234

235 Where U is a heritable confounder responsible for the relationship between X and Y. We thus use  
 236 simulations to understand how the relationships between the traits influence the CRR and our  
 237 ability to use it to distinguish between SNPs, the effects of which are mediated through X or U, and  
 238 SNPs which are causal to the trait of interest without mediation. The details and results  
 239 of the simulations are reported in Supplementary Data 2.1.

240

## 241 **1.9 Clustering of food and drink consumption traits.**

242 Genetic correlations between the food traits were estimated using LD-score regression as  
243 implemented in the ldsc software<sup>35</sup> separately for the corrected and uncorrected GWAS.  
244 Hierarchical clustering of the two genetic correlation matrices was performed using two different  
245 algorithms: “complete” as implemented in the hclust() function from R and the ICLUST algorithm<sup>17</sup>  
246 from the R package psych. ICLUST assigns items to the same cluster based on the loadings of an  
247 underlying common factor. Items are then iteratively added to the clusters only if they increase the  
248 internal consistency of the cluster. The algorithm also allows for addition of traits in case of strong  
249 negative correlation. This has a compelling advantage for food consumption, as for example the  
250 intake of fatty foods has a strong negative correlation with eating healthy food, thus both can  
251 contribute to the same grouping. Differences in clusterings were compared graphically using a  
252 tanglegram in both cases. Given that ICLUST seemed to give more stable results compared to the  
253 “complete” clustering algorithm, the clusters produced with this algorithm were used for further  
254 analyses.

255

## 256 **1.10 Multi-trait genome-wide association analysis**

257 For each of the three main clusters of phenotypes (Meat/Fat, Healthy foods and Psychoactive  
258 Drinks), we performed multi-trait genome scans using a MANOVA-based multivariate analysis  
259 method implemented in the MultiABEL package<sup>37</sup> (<https://cran.r-project.org/package=MultiABEL>).  
260 The method can take genome-wide summary association statistics to infer phenotypic correlation  
261 coefficients and conducts a MANOVA test for each variant across the genome. This overcomes  
262 the issue of non-overlapping samples (e.g. it would be impossible to directly combine people  
263 drinking different type of coffee). The phenotypic correlation coefficient of any two traits can be  
264 estimated in an unbiased manner via the correlation of the genome-wide z-scores, and for binary  
265 outcomes, this is proportional to the phenotypic correlation on the liability scale. The MultiABEL  
266 package also calculates the best linear combination of multiple phenotypes that is associated with  
267 each variant.

268

269 **1.11 Locus definition and prioritisation of genes.**

270 To define a locus, we first selected all SNPs with p-value  $<1 \times 10^{-5}$  and then estimated the distance  
271 between each consecutive SNP located on the same chromosome. Two consecutive SNPs were  
272 identified as belonging to different loci if they were more than 250 kb apart. A locus was then  
273 considered significant if it contained at least one SNP with p-value below the previously described  
274 significance threshold: we thus identified 582 significant locus-phenotype associations. Given the  
275 high pleiotropy between different traits, we merged overlapping loci, which resulted in 302  
276 independent loci.

277 In order to define for each locus which gene is more likely to be responsible for the observed  
278 association, we proceeded with custom prioritisation according to the following criteria. We first ran  
279 Haploreg v4.1<sup>38</sup> using  $r^2=0.8$  as threshold (Supplementary Data 11). We also ran SMR<sup>39</sup> on each  
280 locus in order to identify eQTLs compatible with the observed association pattern. We used the  
281 tissue-specific significant eQTL from the Gtex Project website<sup>26</sup> (Supplementary data 12). We then  
282 proceeded to prioritise the genes according to the following criteria; if the locus met one of them  
283 the following ones were not tested:

- 284 1) The sentinel SNP is itself or is in strong LD ( $r^2>0.8$ ) with a non-synonymous SNP
- 285 2) There is evidence of an eQTL (as tested with SMR) and the sentinel SNP and the eQTL  
286 are in strong LD (min  $r^2=0.5$ ). Given the high number of significant eQTLs detected by  
287 SMR we used a dynamic selection starting from  $r^2 \geq 0.99$  and decreasing by 0.05 at each  
288 step until an eQTL was found or until  $r^2 \leq 0.5$ .
- 289 3) The sentinel SNP is itself or is in strong LD ( $r^2>0.8$ ) with a coding SNP (synonymous or  
290 in the untranslated region of the gene)
- 291 4) The top SNP is intronic or is in complete LD with an intronic SNP in the gene.
- 292 5) The top SNP is in strong LD ( $r^2>0.8$ ) with an intronic SNP in the gene.
- 293 6) The closest gene.

294 The category and prioritised gene for each locus is annotated in supplementary table 3.

295

296 **1.12 Prioritised gene annotation and network construction**

297 Tissue enrichment using MAGMA<sup>13</sup> was run using FUMA<sup>14</sup>. For each available SNP, we chose the  
298 lowest p-value from all corrected analyses. For the functional annotation of the prioritised genes,  
299 we focused only on those coming from the “direct effect only” loci. First, we used the  
300 gene2Function tool from FUMA to identify enrichment in the same tissue used for the analysis with  
301 MAGMA. For both analyses, only tissues with Bonferroni corrected  $p < 0.05$  were considered  
302 significant (Table S11-S12 report full results).

303 We then constructed an interaction network using STRING<sup>15</sup> (Table S13). After removing the  
304 genes which were not connected with any of the others, we ran community detection using  
305 Leuvain’s method (Table S14 for membership). Tissue enrichment analysis was then performed for  
306 each community as done for the full gene set, focusing only on the overexpressed tissue analysis.  
307 Given the much higher number of tests performed, we used Storey’s q-values to define significant  
308 tissues. Gene ontology enrichment was performed for each community using the compareCluster()  
309 function from the clusterProfiler R package<sup>16</sup>. We considered significant those terms which had a  
310 FDR<0.05 using the Benjamini and Hochberg method.

311

### 312 **1.13 Mendelian randomisation to assess causal relationships between food and health**

313 MR was conducted using the food traits as exposures and 79 traits available in MR-base<sup>7</sup> as  
314 outcomes. The genetic instruments were chosen from those with  $p < 5 \times 10^{-8}$  and pruning for LD  
315 ( $r^2 < 0.01$ ). We selected two sets of instruments: the first using raw p-values for thresholding (Raw)  
316 and the second using bias-corrected p-values and the filter with values comprised between 0.95  
317 and 1.05 (CRR). Both sets of instruments were run using both raw effect estimates and corrected  
318 ones for comparison purposes (uncorrected/corrected). We considered the main analysis the one  
319 with the CRR-uncorrected analysis and multiple test correction was applied to these results. All  
320 other analyses were used for comparison purposes to show the difference in applying the CRR  
321 filtering. In order to maximise the number of SNPs available for analysis, the instrumental variables  
322 (IVs) were selected from those available for the specific outcome, thus the IVs change from  
323 outcome to outcome even if the exposure trait is the same. As exposures, we used 26 specific  
324 food items: adding butter to bread, and percentage fat in milk were not analysed as none of the

325 significant SNPs passed the CRR filter; fortified wine was also excluded as no significant SNPs  
 326 were detected in the GWAS. Principal components (PC) traits were also estimated using as  
 327 rotation matrix the eigen decomposition of the genetic correlation matrix. Betas from the GWAS for  
 328 the interested traits were then projected on the rotated PC space. IVs for the PC analyses were  
 329 selected by merging first all SNPs which could be selected as IVs in each trait of the group and  
 330 assigning the lowest p-value in case of overlap. Then the SNPs were pruned for LD and the betas  
 331 projected onto the PC space. Only PCs which could be interpreted were retained (not more than  
 332 3). Groups were created based on the groups created with ICLUST but also grouping the foods  
 333 which had a clear common origin (e.g. oily and non-oily fish). A Sankey diagram of the  
 334 relationships amongst the different traits is reported in Figure S2.

335 **Figure S2. Sankey diagram describing the relationships between the single food traits and the composite ones.**  
 336

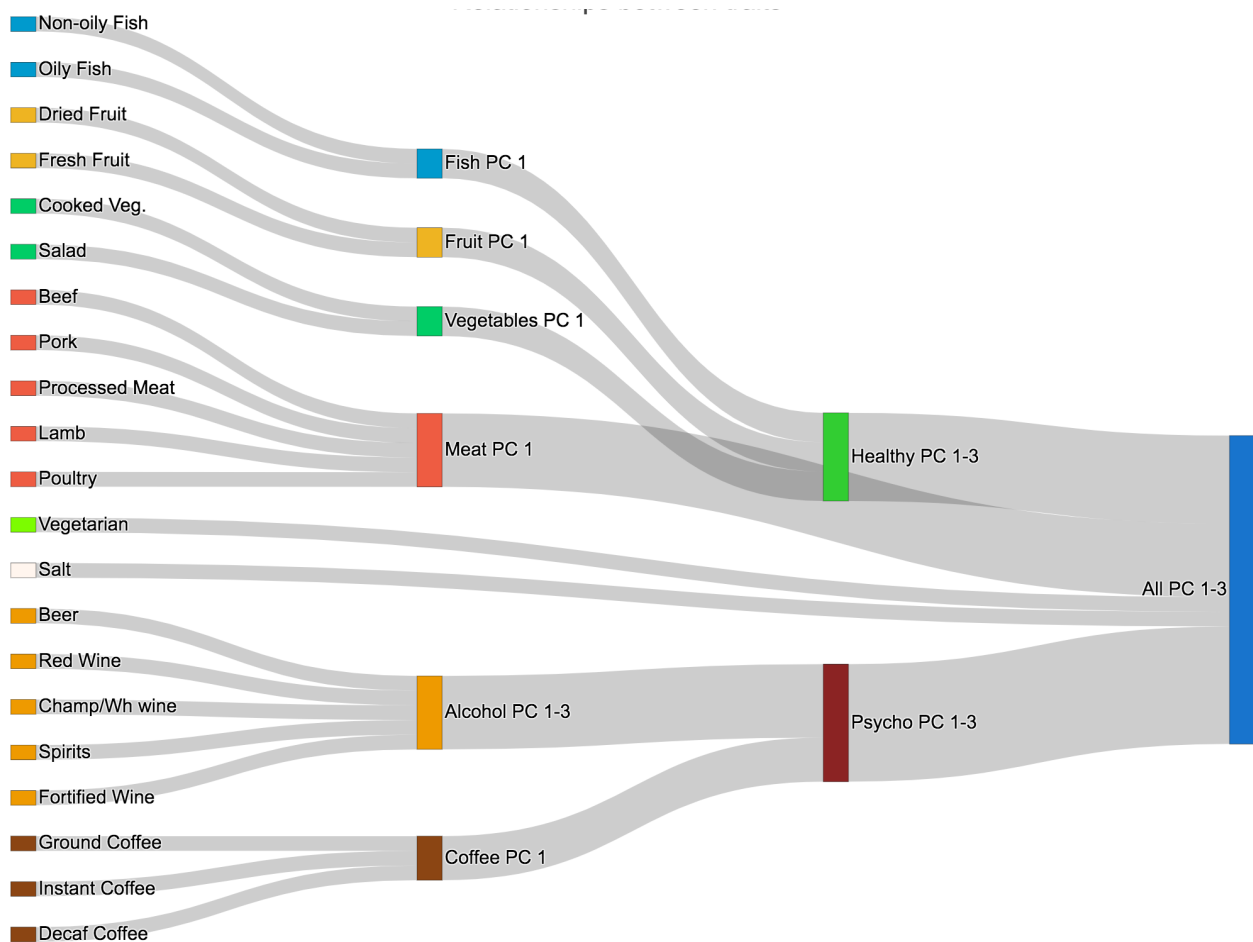

337

338

339 All analyses were run using the same pipeline. After selecting the SNPs to be used as IVs,  
340 exposure and outcome data were harmonised. Only non-palindromic SNPs were used to avoid any  
341 misalignment between the two datasets. The IVs were tested for heterogeneity and outliers were  
342 removed using the MR-Radial method<sup>17</sup>. Inverse variance-weighted (IVW) MR was then used as  
343 the main analysis method, using random effects IVW if the residual heterogeneity had a p-value  
344 less than 0.05/79. We then tested for the presence of directional pleiotropy using the intercept from  
345 the MR-Egger regression. Finally, MR median and MR-Raps were used as sensitivity analyses. All  
346 results have been made available through an online app ( [https://npirastu.shinyapps.io/Food\\_MR/](https://npirastu.shinyapps.io/Food_MR/))  
347 which allows interrogation of the results both visually and in tabular form.

348

349 **2. Extended Figures/Results**

350

351 **Fig S3. Results for the Multivariable MR.** Panel A The heatmap represents the effect of the health related traits on  
 352 each food trait using from the multivariable model. The color is proportional to the effect size.  
 353 Panel B. The plot represents the proportion of genetic variance which is explained by the effect of the health related traits  
 354 on the food traits. Clearly some of the food traits are extremely biased having up to 40% of genetic variance due to the  
 355 mediation of the health related traits.  
 356

**A**

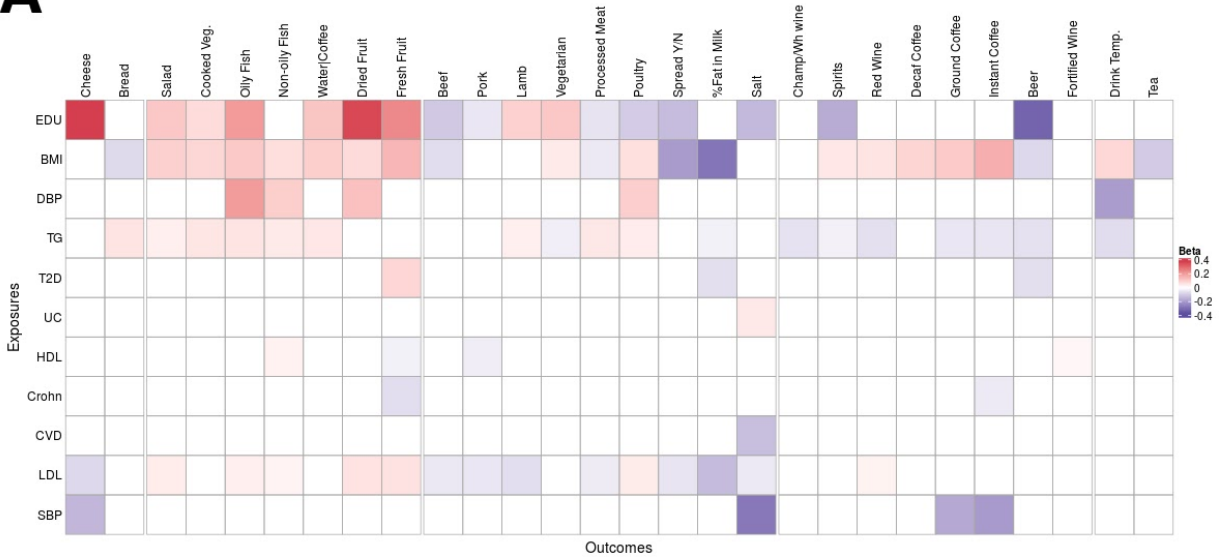

**B**

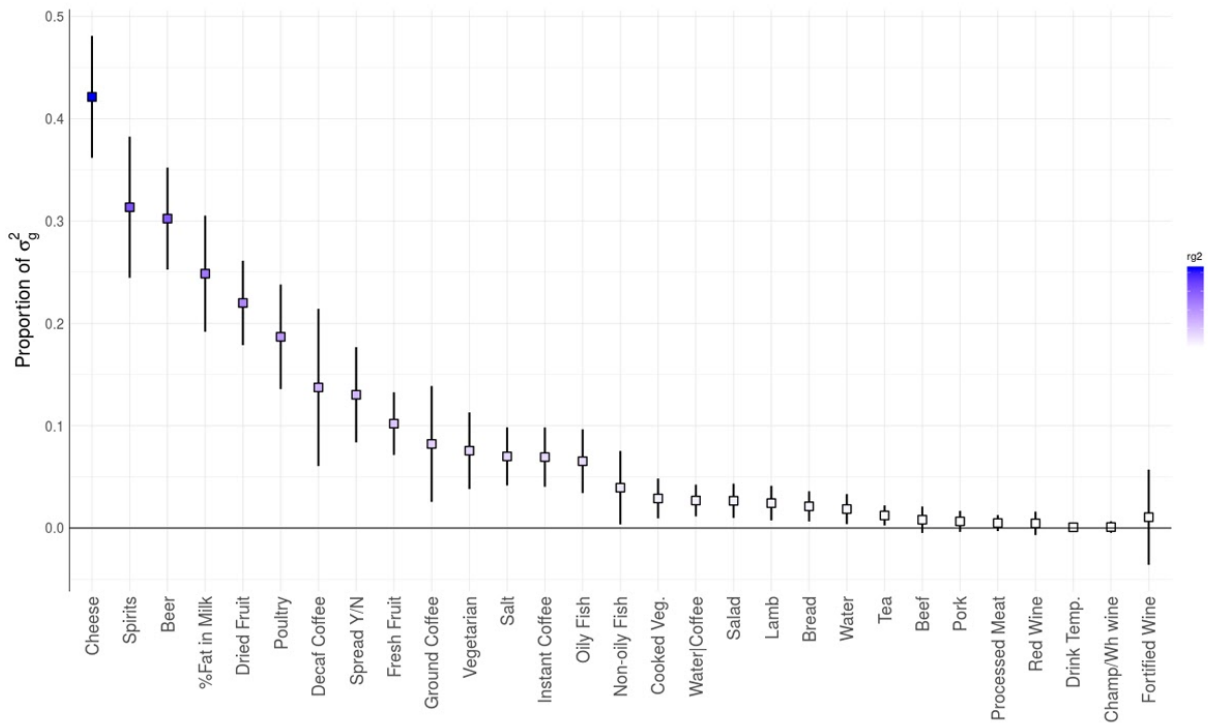

357

358 **2.1 Simulation results for optimal parameter tuning for selecting SNPs directly associated**  
359 **with the trait of interest.**

360 The objective of the simulations was to understand if the corrected/raw beta ratio limits chosen  
361 based on the genes for which biology is well known are correct. The simulations are particularly  
362 complex to set up since the DAG of the studied relationships involves bidirectional causal effects.  
363 Another important limitation is the fact that the exposure trait is not directly and correctly observed  
364 but it is the result of a FFQ in which the noise is extremely high with a test-retest correlation that  
365 can be as low as 0.5 ( $r^2=0.25$ ).

366  
367 The simulations include 4 different normally distributed traits:  
368  $Y_t$  which is the true trait of interest (food consumption in our case) without the effects of the  
369 outcome. X and U represent each the sum of all traits causal to Y. The difference between X and U  
370 is that U traits are also causal to X (so they act as a confounders) while X traits may also be  
371 subject to reverse causality by  $Y_t$ .  $Y_o$  is the observed trait which thus includes all causal effects and  
372 the noise due to the use of the questionnaire.

373 **Figure S4.** Diagram describing the relationships between the simulated traits and their relative parameters.  $G_Y$  refers to  
374 the genetic variants which directly affect Y before any influence of confounding or other mediated traits ( $Y_t$ ).  $G_U$   
375 represents the genetic component of a confounder trait U which causally affects both Y and X.  $G_X$  represents the genetic  
376 component of the outcome trait X which is in turn causally affecting the trait  $Y_i$ .  $Y_o$  represents the actual observed trait to  
377 which we add noise to reflect the test-retest correlation in FFQ data.  
378

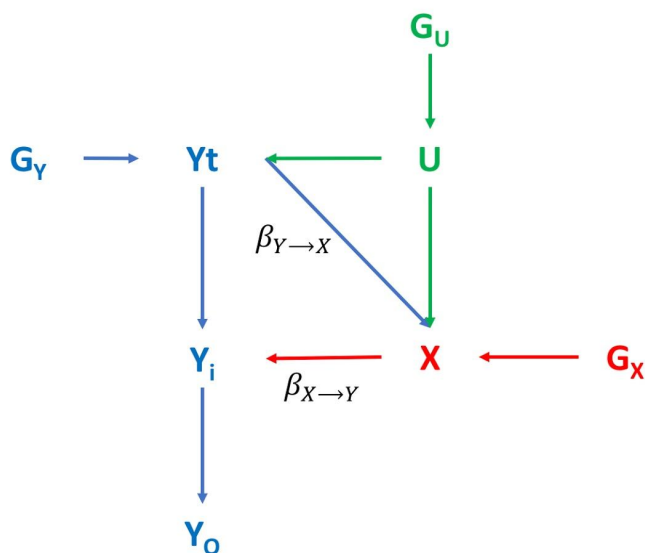



379 For simplicity each of the first 3 traits is determined by 10 SNPs each of which has a frequency of  
380 0.3 and explains 1% of variance. Overall 30 SNPs have been used for each simulation and they  
381 are denoted as  $SNP_Y$ ,  $SNP_X$  and  $SNP_U$  depending if their direct effect is through Y, X or U.

382 The relationships between the different traits are summarised in Figure S4.

383 Where:

384  $\beta_{U \rightarrow Y}$  represents the effect of the confounder on  $Y_t$ ,

385  $\beta_{U \rightarrow X}$  represents the effect of the confounder on X,

386  $\beta_{Y_t \rightarrow X}$  represents the effect of  $Y_t$  on X,

387  $\beta_{X \rightarrow Y_t}$  represents the effect of X on  $Y_t$ .

388  $\beta_{Y_0 \rightarrow X}$  represents the causal effect we would be able to measure through MR. This measure is not  
389 of interest for the scope of our simulations.

390

391 For simplicity the  $\beta_{U \rightarrow Y}$  and  $\beta_{U \rightarrow X}$  were both set so that the confounder explained 20% of the variance  
392 of Y and X. Simulations were then conducted for a large array of values of  $\beta_{X \rightarrow Y_t}$  and  $\beta_{Y_t \rightarrow X}$ , which  
393 ranged from 50% of variance explained to 0%, with both positive and negative effects. Values of  
394  $\beta_{Y_t \rightarrow X}=0$  simulates the case where no reverse causality exists. A denser grid was used between  
395  $r^2=0-0.1$  to examine more closely the results at smaller effects which likely better resembles most  
396 real cases. Each set of parameters was run 10 times so that 100 SNPs were simulated for each  
397 category and set of parameters. To replicate the conditions of the paper we simulated two different  
398 independent populations so that we could apply the MV MR correction procedure to study the  
399 effects in a setting which resembles the real life scenario. Both populations were simulated so that  
400  $N=400,000$ .

401

402 After simulating the two populations we proceeded to perform the association analysis for all 30  
403 SNPs with all three observed traits, leaving out the original trait of interest  $Y_t$ , assuming we would  
404 not be able to directly observe it (as is the case for food consumption measured with FFQ). We  
405 then performed the MV MR of X and U on Y using as IV all SNPs which had  $p < 5 \times 10^{-8}$  in either the  
406 GWAs from X or U assuming we had no way of distinguishing the source of the SNP. For this

407 analysis we used population 2 for the exposure betas and p values while population 1 for the  
408 effects of Y. Finally we used the betas combined with the population one  $Y_0$  association results to  
409 estimate the corrected/raw ratio (CRR).

410

411 The main objective was to verify if using the proper limits of the corrected/raw ratio allows the  
412  $SNP_Y$ s to be correctly distinguished from the  $SNP_X$ s and the  $SNP_U$ s. Figure S5 shows the  
413 scatterplot of the CRR for the 3 categories of SNPs for each combination of simulated parameters.  
414  $R^2$  refers to the amount of variance explained by the causal trait. The values are both positive and  
415 negative to reflect the direction of the correlation. The CRR range for the plot is limited to values  
416 between 0 and 2 because  $SNP_Y$ s never assumed values outside this range.

417

418  
419

**Figure S5.** Scatterplot of the CRR values for  $G_x$  (in red),  $G_y$  (in green) and  $G_u$  (in blue) at the different values of the effect of  $Y$  on  $X$  and of  $X$  on  $Y$ .

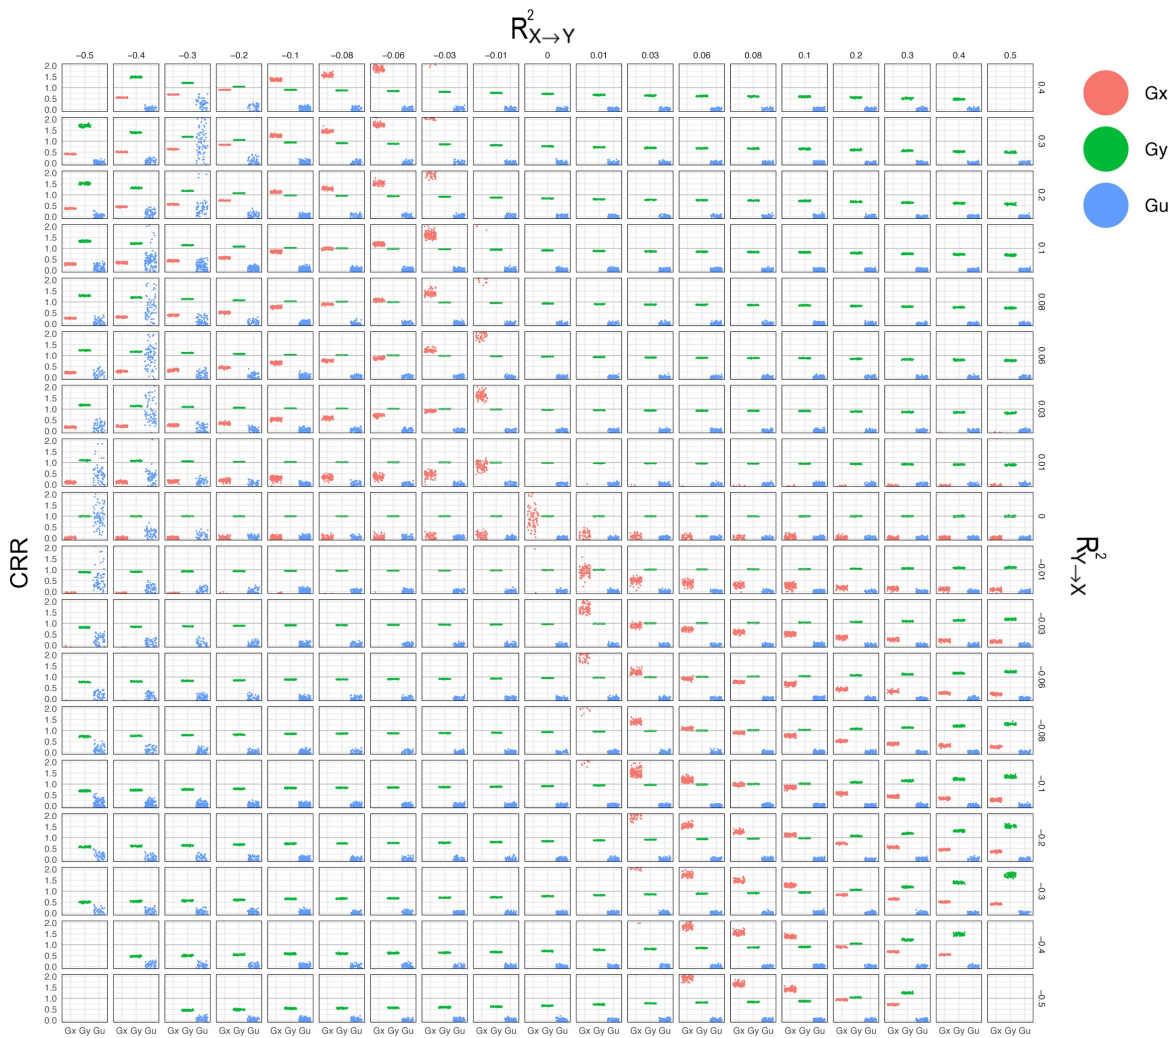

420

421

422 Clearly for most combination of parameters it is possible to easily separate the  $SNP_Y$ s from the

423  $SNP_U$ s. The task becomes slightly more complex in the case of the  $SNP_Y$ s and  $SNP_X$  in which

424 some overlap is possible, especially when  $\beta_{X \rightarrow Y} = \beta_{Y \rightarrow X}$  however this particular case is probably

425 unlikely in real case scenarios as it would mean that the two effects cancel each other out.

426 From the previous figures, it is clear that if we were to know  $\beta_{X \rightarrow Y}$  and  $\beta_{Y \rightarrow X}$ , we would be able to

427 determine which values of CRR to use for the selection of the IVs in most cases. However without

428 knowing these *a priori* it is however quite difficult as they would require prior knowledge of valid IVs

429 for both  $Y$  and  $X$ , which is the objective of the method. Thus, the real question is if there is a range

430 of values for the CRR which maximises the probability of not discarding the  $SNP_Y$ s while not

431 including  $SNP_X$ s or  $SNP_U$ s.

432

433 Therefore we verified how the probability of actually detecting a SNP<sub>Y</sub>, P(detection), and the  
 434 probability that an IV which met the criteria was actually a SNP<sub>Y</sub>, P(SNP<sub>Y</sub>), at different ratio limits.  
 435 For the values selected for our study (1±0.05), the P(detection) is 0.27 overall, and 0.57 for the  
 436 combination of the weak effects, while P(SNP<sub>Y</sub>) is >80% in both cases (Figure S6). Given that, for  
 437 almost all traits we have at least 1 SNP which meets these criteria and that loosening them will  
 438 increase the chances of including SNP<sub>X</sub>s as instruments, the choice of parameters used so far  
 439 seems reasonable.

440 **Figure S6. Corrected-to-raw ratio (CRR) successfully distinguishes mediated and non-mediated associations. (a)**  
 441 *Graph showing mediated and non-mediated pathways. The values of CRR that different types of simulated SNPs (Gx,*  
 442 *Gy, Gu) assume at different explained variances ( $\sigma^2$ ) of X->Y when (Y->X)≠0, i.e. presence of reverse causality (b).*  
 443 *The values we used for defining a “non-mediated” variant are highlighted in purple. (c) The proportion of variants that are*  
 444 *truly Gy, that is directly associated with the trait of interest, across a range of CRR. (d) The overall proportion of variants*  
 445 *directly associated with the trait (SNP<sub>Y</sub>) whose CRR falls inside the specified ranges, i.e., the probability of detecting*  
 446 *SNP<sub>Y</sub> over all possible scenarios. When the effect of Y->X is equal to zero, Gy is clearly distinguishable from Gx and Gu*  
 447 *using CRR (Fig. S5), however, when (Y->X) increases, values of CRR for both Gy and Gx start varying and*  
 448 *overlapping (Fig. S6b). We thus determined which values of CRR would maximise the probability of correctly selecting*  
 449 *Gy under all scenarios. Clearly the parameters we have chosen for defining a “non-mediated” SNPs maximise both the*  
 450 *probability of correctly selecting a SNP.*

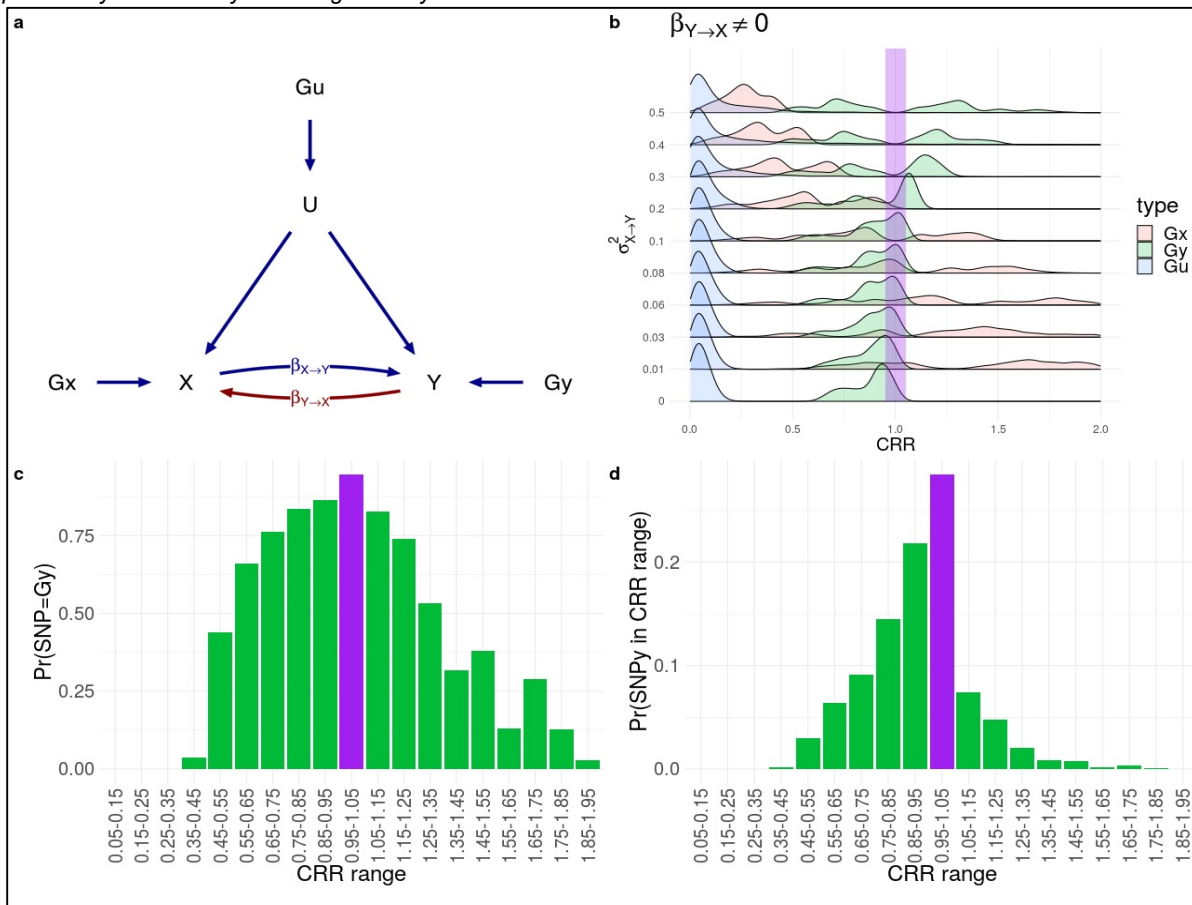

451

452

453

454 **2.3 Effects of GWAS correction on genetic correlations.** To investigate how the mediation  
455 procedure affected the genetic correlations amongst the consumption traits, we compared the  
456 correlation patterns using the raw and corrected results (Table S10). Overall, the two genetic  
457 correlation matrices were very similar, but with some important differences. In particular, the  
458 number of Bonferroni-corrected significant correlations diminished in the corrected results,  
459 reflecting the fact that the conditioning on the health-related traits will weaken those correlations  
460 which are partly due to those traits. The hierarchical clustering of the traits (Fig. S7a) using the two  
461 different matrices shows an improvement in the quality of the clustering with the groups formed  
462 using the corrected  $r_G$  matrix being more interpretable than the raw ones. While the group  
463 composed of healthy foods is stable across methods, we can see that using the raw  $r_G$ s, salt  
464 clusters with beer and strongly alcoholic beverages, while wine clusters closer to coffee than other  
465 alcoholic drinks, perhaps reflecting medical advice. Also, the fatty foods (percentage fat in milk and  
466 adding spread to bread) cluster in an unexpected way, grouping closer to healthy foods than to  
467 meat. Looking at the corrected  $r_G$ s, clustering accords better with common sense, for example fatty  
468 foods grouping with meat and salt.

469 **Fig S7. Clustering of food consumption traits before and after correction.** (a) Comparison between the hierarchical  
 470 clustering of the food traits based on the uncorrected (on the left) and corrected (on the right) genetic correlations. Black  
 471 lines connect the same traits for which the clustering has changed. Dendrograms connect the items in each case with  
 472 the boldness of the line representing the strength of support for the tree nodes. Unique nodes are represented with a  
 473 dashed line while shared nodes with a bold one. The thickness of the line is thicker for conserved higher level nodes. (b)  
 474 Genetic correlation plot amongst the food traits. The lower triangle reports the corrected genetic correlation results while  
 475 the upper triangle reports the uncorrected ones. The stars report the Bonferroni-corrected significant correlations. The  
 476 dendrogram and the boxes represent the clustering according to the ICLUS algorithm.

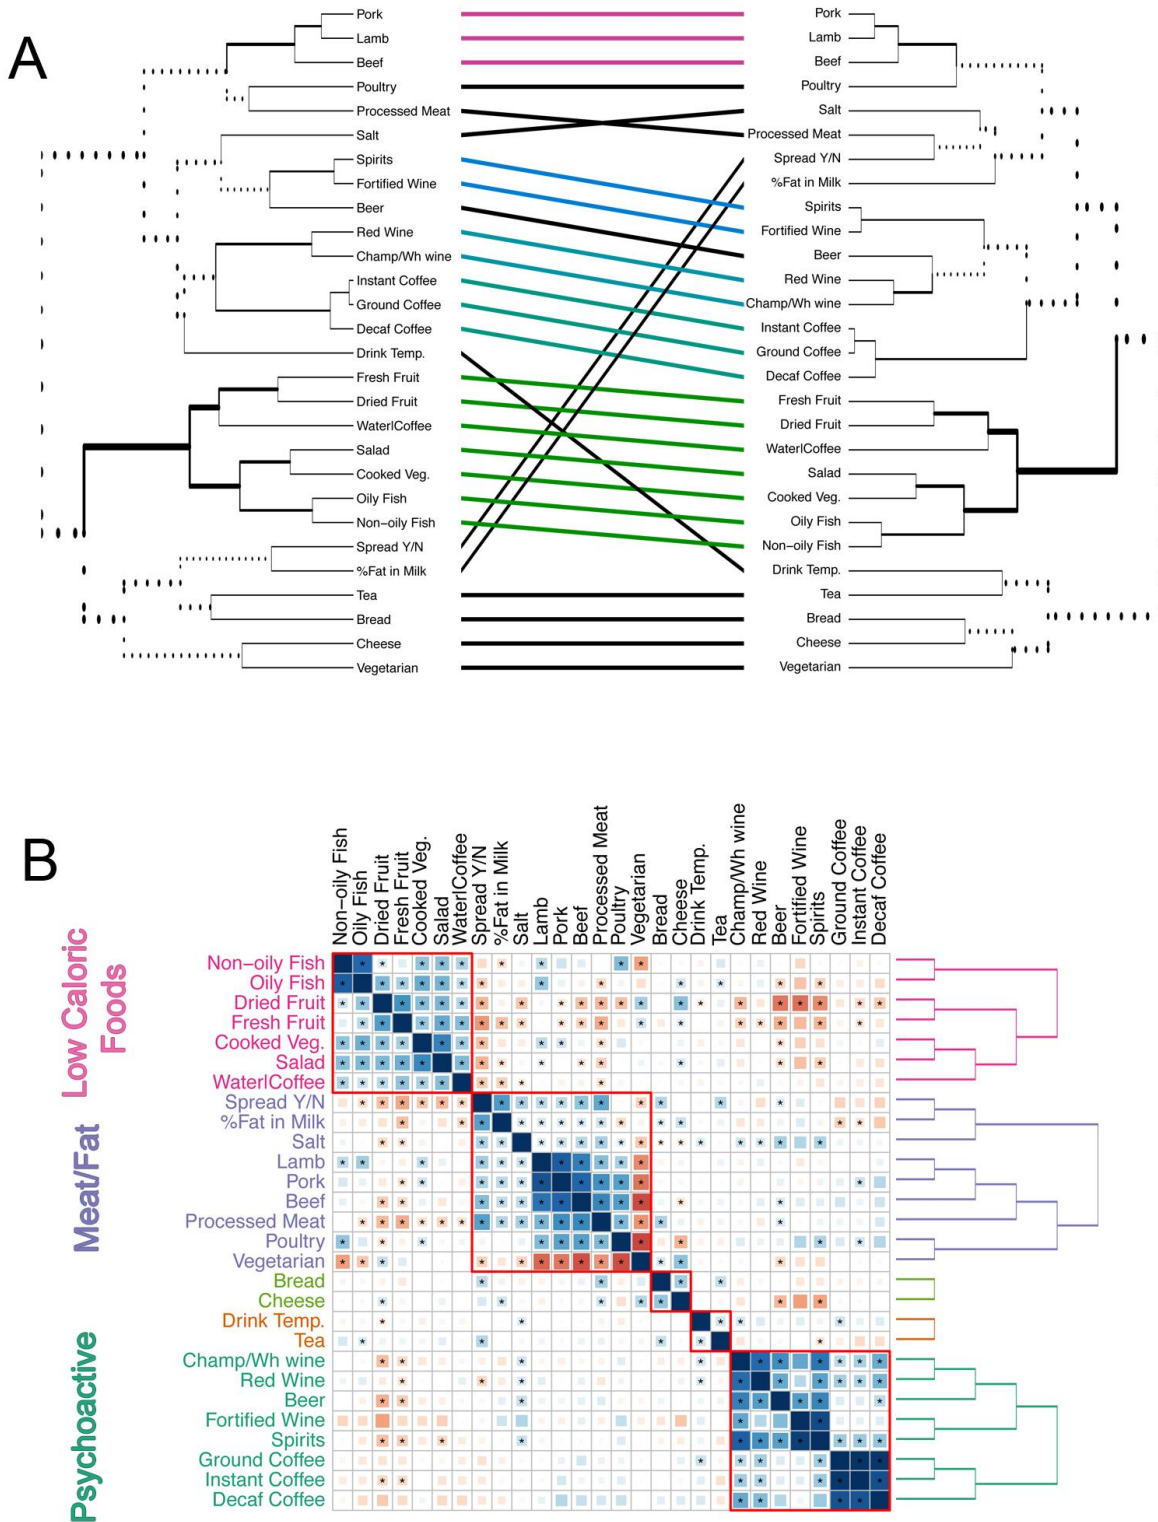

477

478

479 The clustering results show that the mediation correction procedure has been at least partly able to  
480 remove the genetic correlations due to shared heritable factors, rather than common biology. Such  
481 correction is extremely important, not only for creating homogeneous clusters of traits for  
482 multivariate GWAS, but also because these may change in a population- or age-dependent  
483 manner. It is reasonable to believe that some of these strong mediating factors (e.g. LDL  
484 cholesterol) are due to the older age of the samples in UKB (indeed ~27% are prescribed lipid-  
485 lowering therapy and will thus likely have been given medical advice to change their diet). It will be  
486 interesting to compare with a younger population less affected by perceived or actual medically  
487 advised lifestyle changes.

488

489 To explore the shared genetic underpinnings of food choices and a broad range of complex traits,  
490 we estimated genetic correlations with 832 traits present in LDhub<sup>11</sup>. We identified 6967 and 4943  
491 significant (FDR<0.05) genetic correlations for raw and corrected traits, respectively across a large  
492 number of traits (Table S10, interactive view available at  
493 [https://npirastu.shinyapps.io/rg\\_plotter\\_2/](https://npirastu.shinyapps.io/rg_plotter_2/)). The correction affected greatly not only the genetic  
494 correlations with the traits used for the correction but also those with many others. We can only  
495 highlight a number of examples of changes in genetic correlations here. A notable instance is that  
496 prior to adjustment, CVD and percentage fat in milk showed a genetic correlation of -0.24, i.e.  
497 decreasing the %fat increased the chances of CVD, but after correction,  $r_G$  was 0.02. Another  
498 example is again cheese consumption which has a genetic correlation with a longer paternal  
499 lifespan of 0.5 before adjustment, but only 0.2 afterwards. These results are particularly important  
500 because they suggest that the recent epidemiological findings associating higher consumption of  
501 fat in milk with protection from CVD<sup>18,19</sup> may be due to confounding and caution should be used  
502 when defining dietary policies.

503

504 **2.4 Multivariate association analysis.** Clustering of the traits using ICLUST identified five  
505 different groups (Fig 7b): one composed of increased meat, fat, salt and decreased vegetarianism  
506 (labeled as “Meat/Fat”), one made up of alcoholic beverages and coffee (labeled “Psychoactive”)



507 and one comprised of healthier items such as fish, fruit and vegetables (labeled “Low Calorie  
508 Foods”). Two final groups contained only two items each: drink temperature and tea; and cheese  
509 and bread; these were not used for the MV analysis. In order to explore if additional loci influence  
510 these groups we ran a multivariate GWAS using the package MultiABEL, which performs  
511 MANOVA on summary statistics. 168 additional associations, including 42 novel loci not identified  
512 at the single trait analysis, were identified in multivariate analysis of the three main food groups  
513 (Table S5) An example of these group-level loci is rs17400325, a non-synonymous variant at  
514 *PDE11A* associated with the consumption of Low Calorie Foods. When each trait was examined  
515 singularly we found that the C allele was associated with higher fresh and dried fruit consumption  
516 and a lower consumption of fish and vegetables. Mutations in this gene are responsible for primary  
517 pigmented nodular adrenocortical disease-2 (OMIM:610475), which leads to high cortisol levels,  
518 which in turn are associated with a higher consumption of highly palatable foods<sup>20</sup>.

519

520 **2.5 Functional annotation of food consumption genes.** We used several approaches to  
521 understand the biological underpinnings of food choice. First we ran stratified LD-score  
522 regression<sup>12</sup> using the bias-corrected GWAS (Fig. S8). Looking at functional annotation (Fig. S8a),  
523 we found a strong enrichment for almost all food traits in conserved genomic regions with the  
524 exception of being vegetarian, decaffeinated coffee and fortified wine consumption. This is not  
525 surprising if we consider that nutrition is one of the most basic biological functions. We next looked  
526 at tissue enrichment in the Gtex<sup>21</sup> and Franke lab expression<sup>22</sup> datasets and epigenetic signatures  
527 from Roadmap<sup>23</sup>. There was substantial agreement across the two expression datasets with  
528 enrichment mostly limited to brain areas linked to reward and feeding, e.g. hypothalamus, nucleus  
529 accumbens, putamen. Most food traits were also enriched for epigenetic marks annotated to the  
530 male and female fetal brain, which underlies the importance of foetal development in determining  
531 food choices.

532



533  
534  
535  
536

**Fig S8. Heatmap of tissue and functional enrichments.** The colour is proportional for the enrichment revealed by stratified LD-score regression. Only correlations with  $FDR < 0.05$  are reported. **(a)** Enrichment among different classes of functional annotation. **(b)** Tissue enrichment from *Gtex* expression. **(c)** Tissue enrichment from ROADMAP epigenetics. **(d)** Tissue enrichment from the Franke lab dataset.

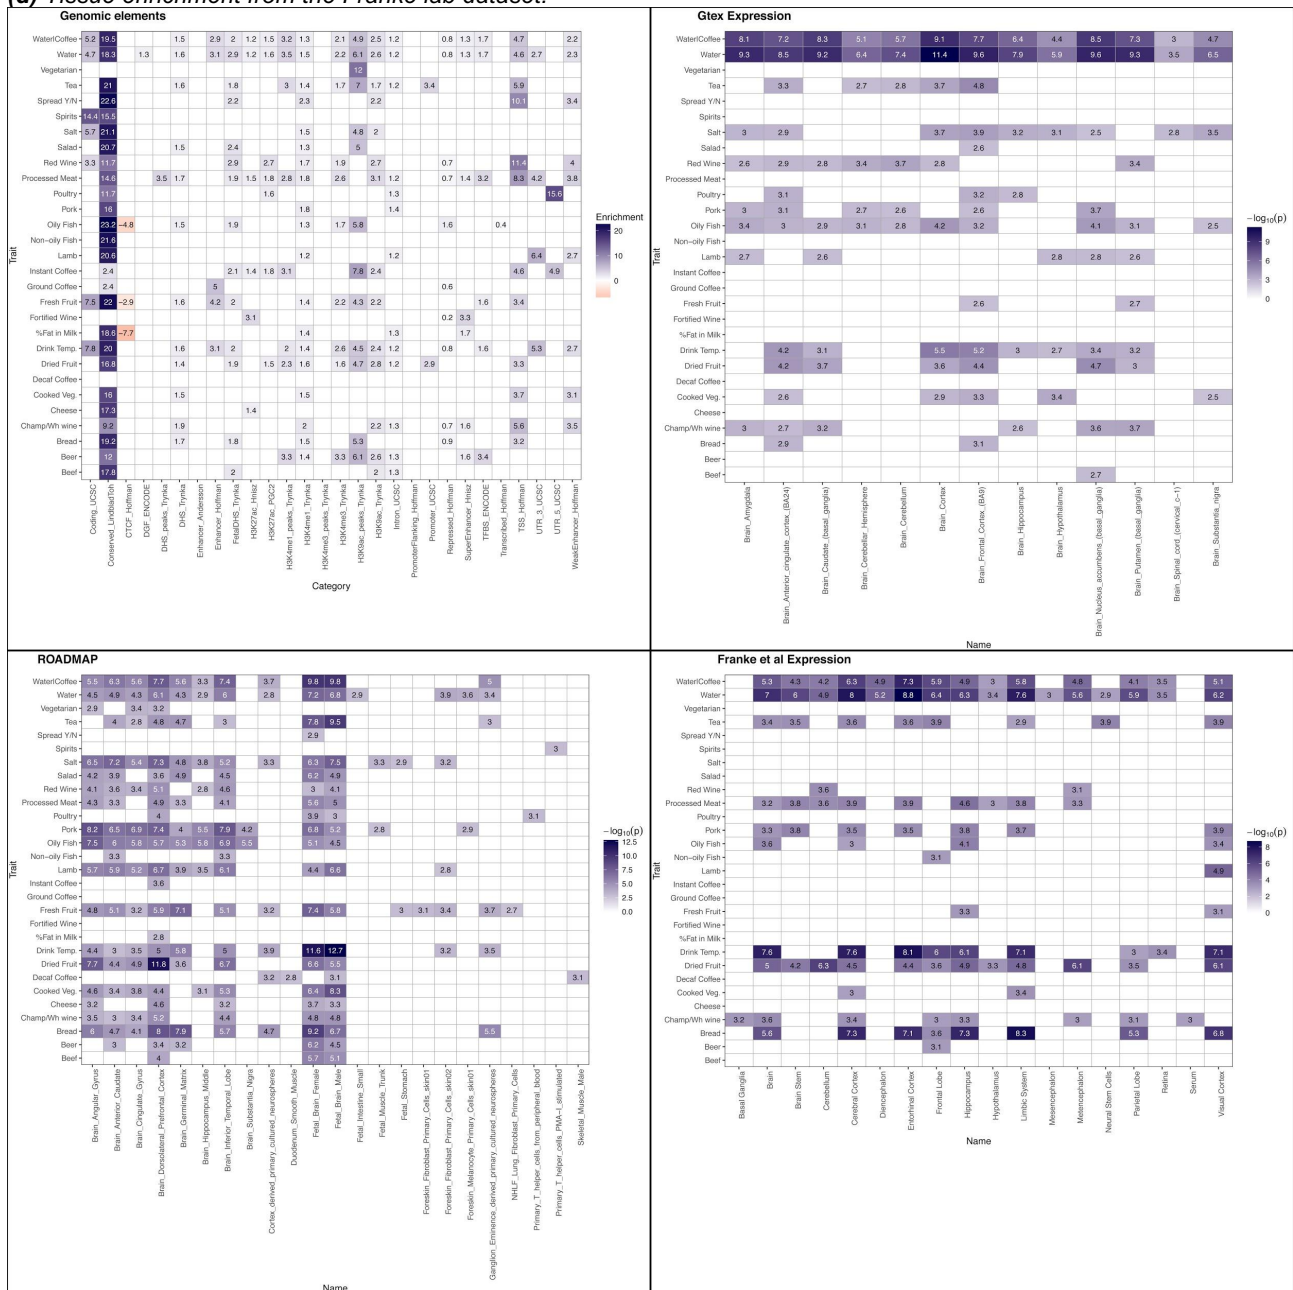

537

538

539 Tissue over-representation analysis using MAGMA<sup>13</sup> (which first runs a gene-wide test and then  
540 measures enrichment using those which results significant) on the merged GWAS results (for each  
541 SNP the lowest p-value was used) confirmed the results from LD-score regression highlighting the  
542 same brain areas, e.g. substantia nigra, nucleus accumbens, hypothalamus, amygdala, known to  
543 influence food choices and reward (Fig. S9). Very similar results were obtained when the analysis  
544 was conducted using only the prioritised genes in the “direct effect only” loci. In this case, as well

545 as over-expression in the brain, we also detected under-expression in the kidney, stomach,  
546 pancreas, oesophagus, colon, lung and small intestine (Fig. S9).

547 **Fig. S9. Dotplot of the overexpression analysis run on the prioritised genes from the non-mediated loci and the**  
548 **overrepresentation analysis performed with MAGMA.** The overexpressed tissue involved by the two methods were  
549 highly overlapping with the analysis performed on the prioritised genes showing also the tissues in which there is  
550 evidence of underexpression.

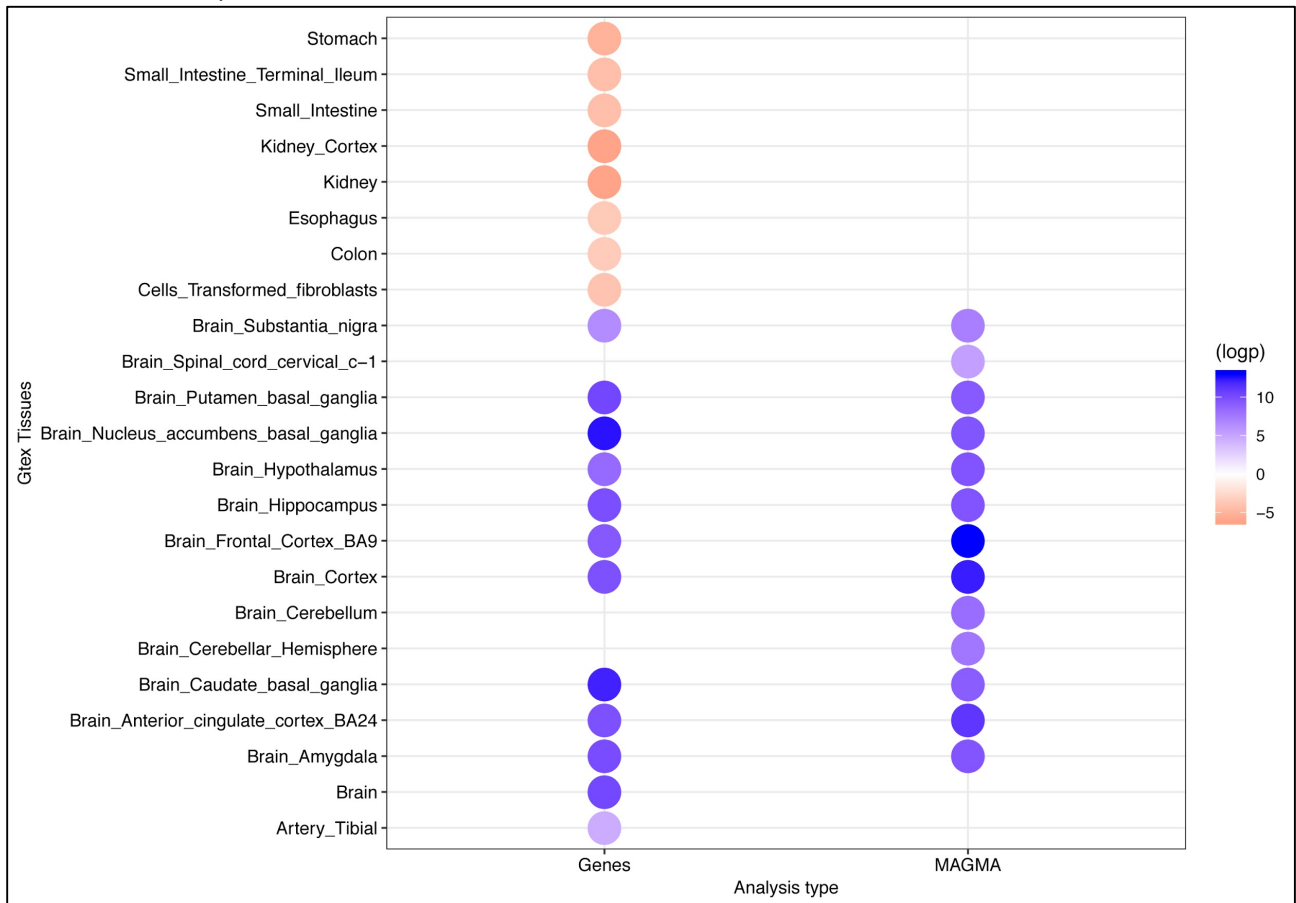

551  
552 **2.6 Network analysis.** The fact that the genes we prioritised show the same enrichment pattern as  
553 stratified LD-score regression and MAGMA, also suggests that the prioritisation is in most cases  
554 correct. In order to explore any interactions between the selected genes, we used STRING<sup>24</sup> to  
555 build an interaction network between them. A large network is revealed (Fig. 4, Table S13),  
556 including 132 genes (out of 215 overlapping the STRING database), sharing 224 edges ( $p < 1 \times 10^{-16}$ ).  
557 To identify if there were groups of genes which were more interconnected than the others, we  
558 performed community identification using Leuvain's method<sup>24,25</sup>. Ten communities are identified,  
559 each with specific characteristics in terms of function, cellular localisation and preferential  
560 expression (Fig. S11 for and overview and FigS 12-21 for specific communities, Table S15 for  
561 significant Gene Ontology terms, Fig. S10, Table S16 for significant tissue enrichment). For

562 example, community 1 genes are linked to numerous biological processes ranging from feeding  
563 behaviour and taste to hormone binding and transport of fatty acids, and preferentially include the  
564 genes expressed in several brain areas and the liver. Genes in community 2, on the other hand,  
565 are linked to energy and glucose metabolism, are preferentially located in the mitochondrion and  
566 are over-expressed in the skeletal muscle and tibial artery. Another interesting example is  
567 community 8 which contains genes specifically over-expressed in the brain and which are involved  
568 in synaptic assembly and organisation and in neurotransmitter secretion, while other communities  
569 relate to steroid hormone response, acetylcholine receptor regulation, drug metabolism and Golgi-  
570 mediated transport. Thus, although the overall expression analysis strongly links dietary choices to  
571 the central nervous system, there are actually several different groups of genes at play, with  
572 specific functions in specific tissues.

573

574 **Figure S10 Tissues which overexpress the genes in each community.**

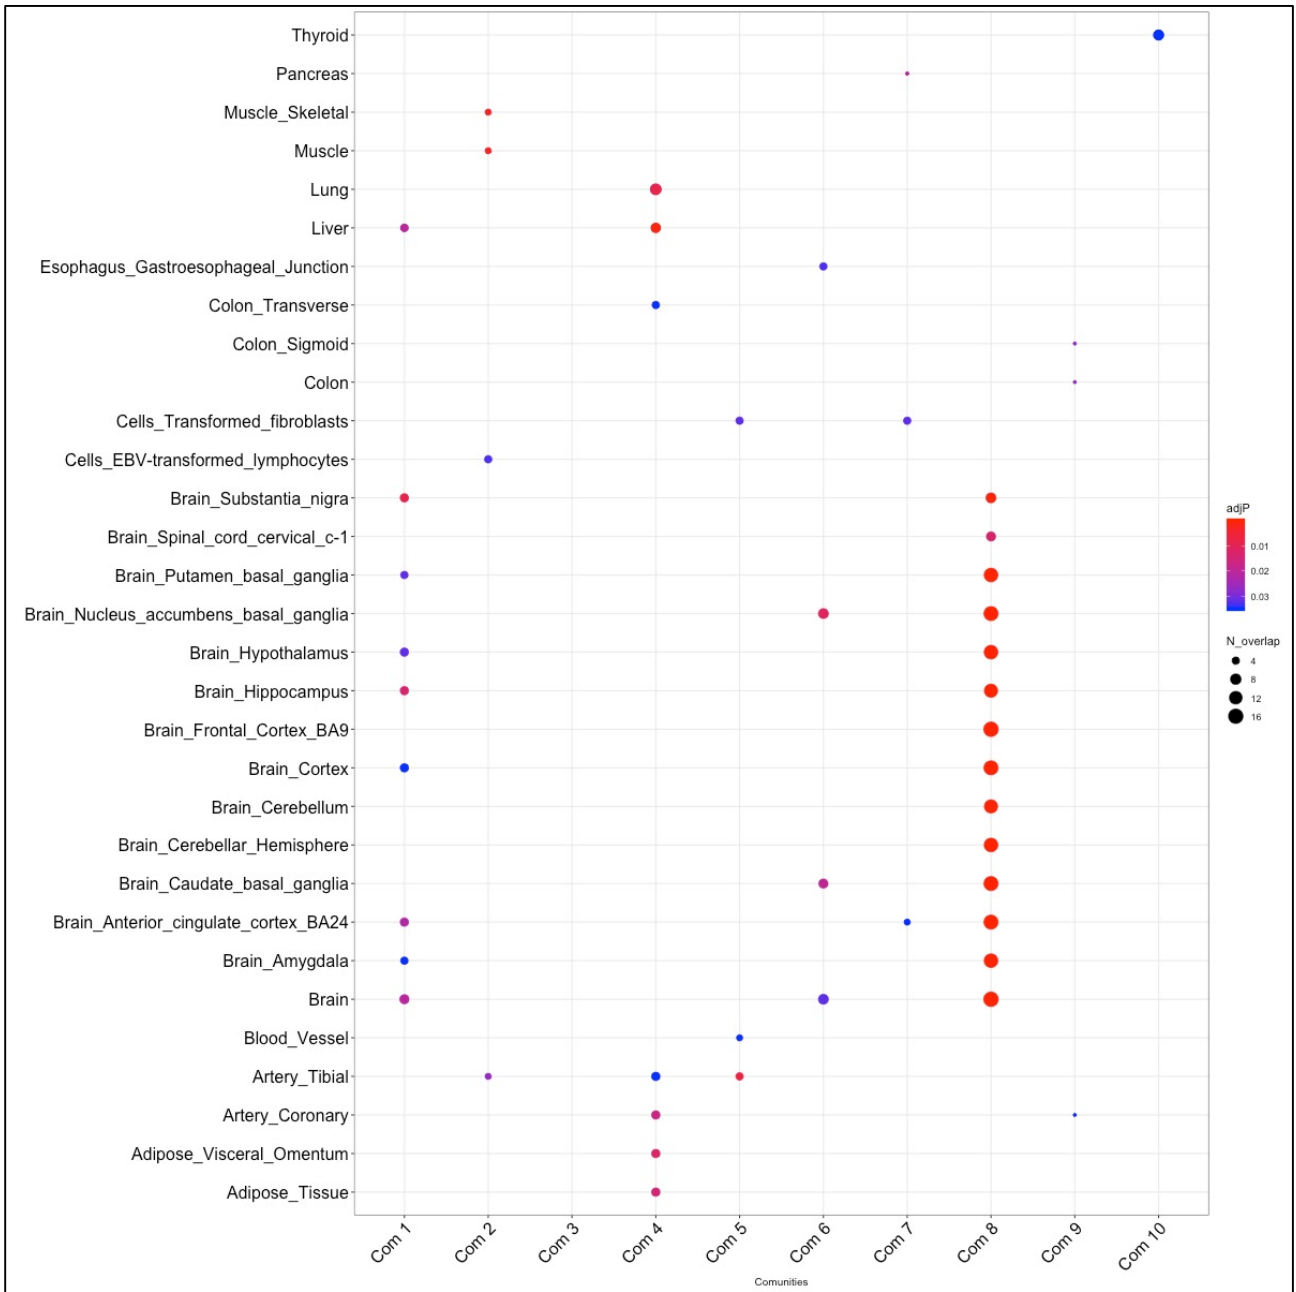

575

576

577  
578  
579

**Figure S11 Overlap in Go-terms between different communities.** The figure shows that there is no overlap (with the exception of 2 terms) between the terms enriched in each community. The labels have been removed as the plot is meant to only show the overlaps. Figure S12-22 show the enriched terms for each community separately.

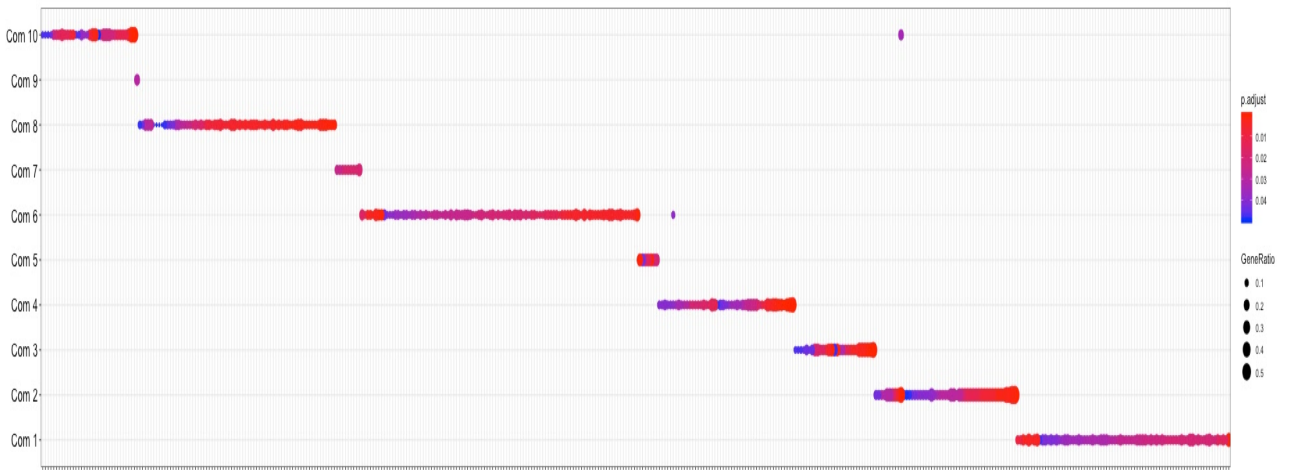

580

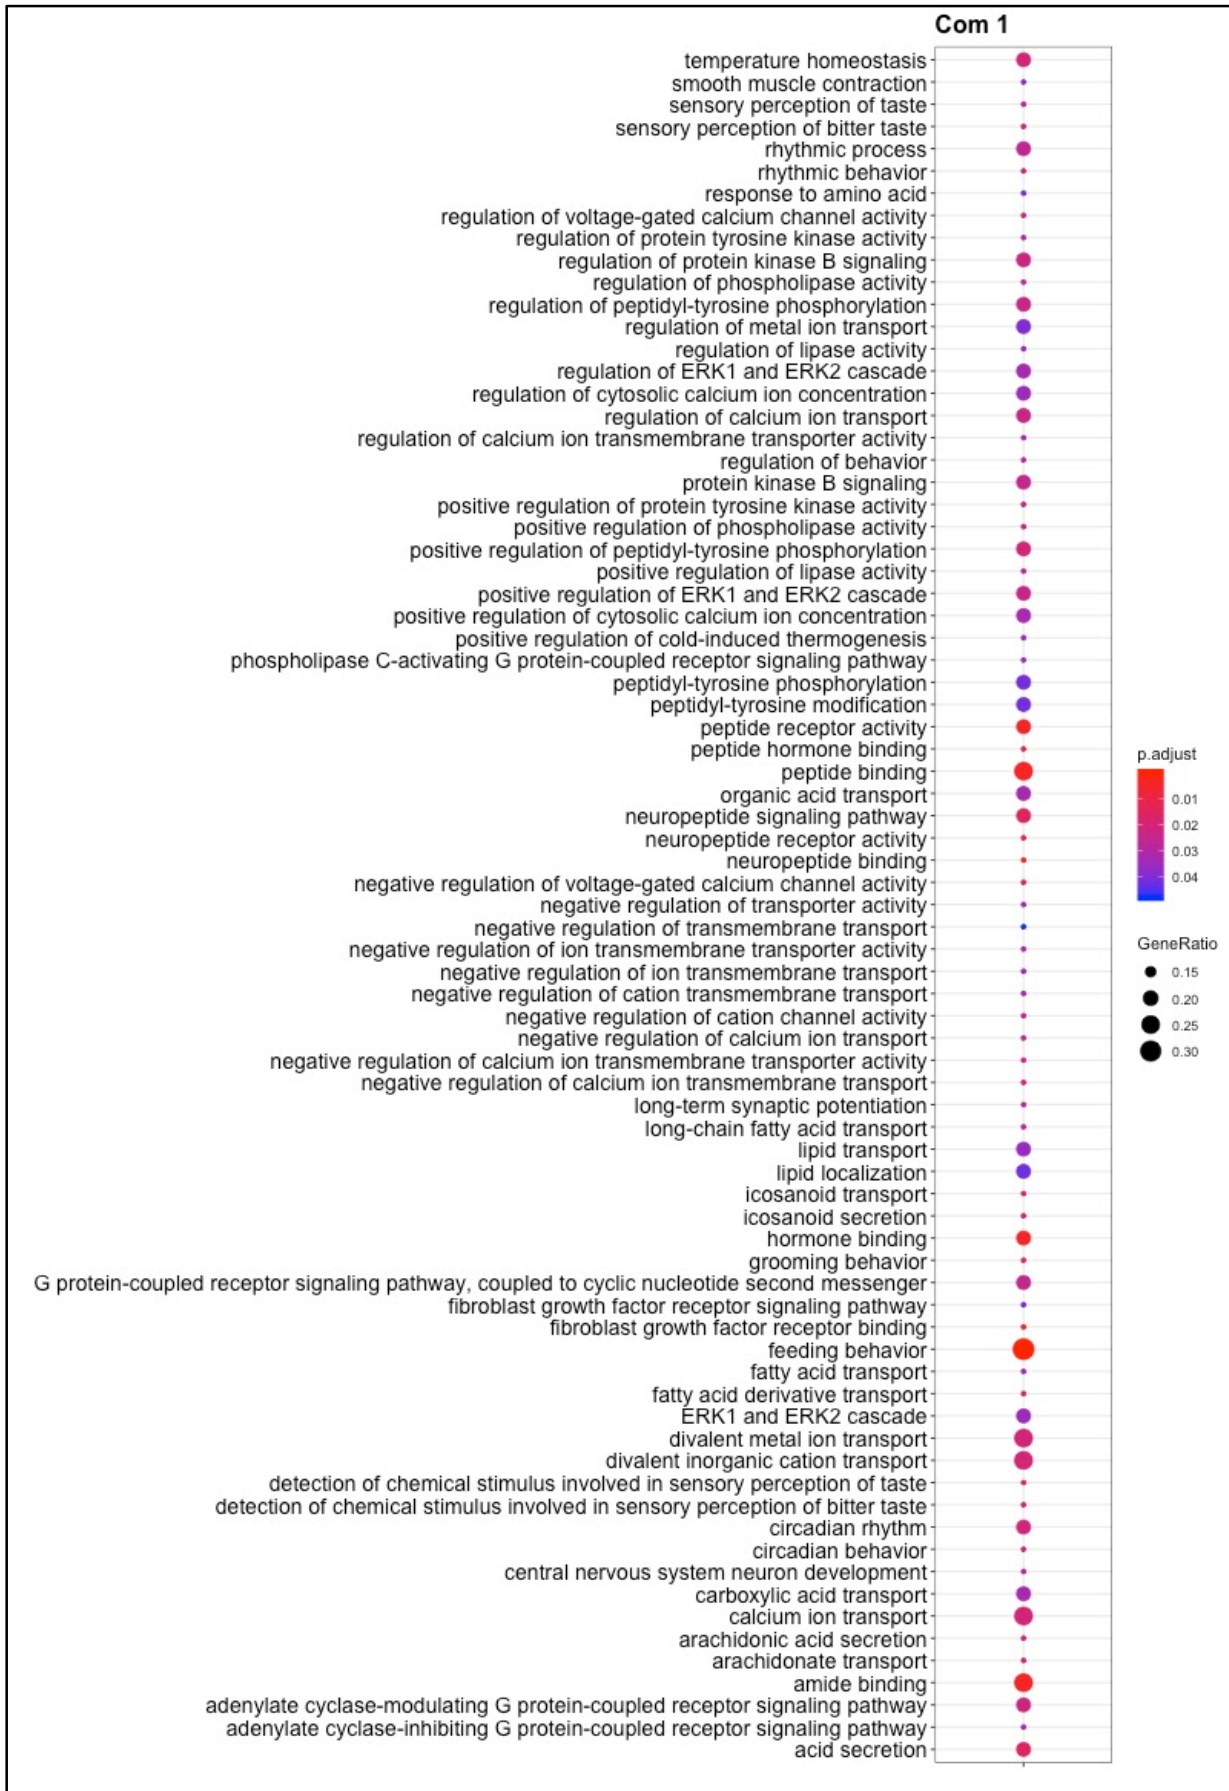

583 **Figure S13 Enriched GO-Terms for community 2**

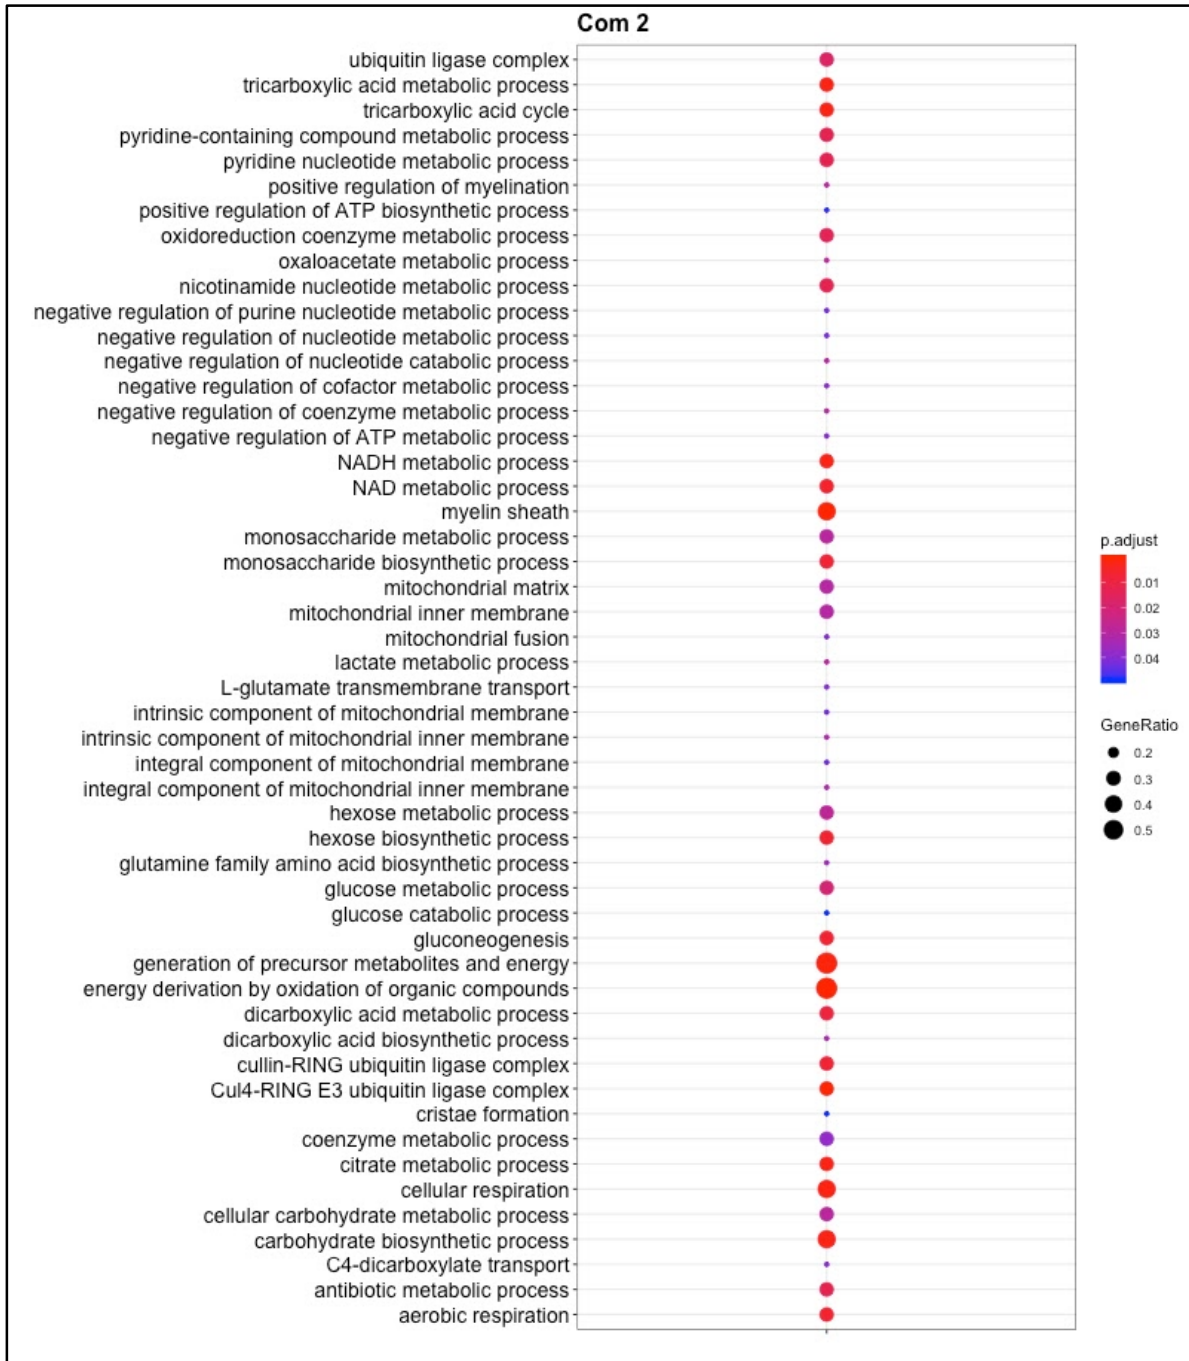

584

585



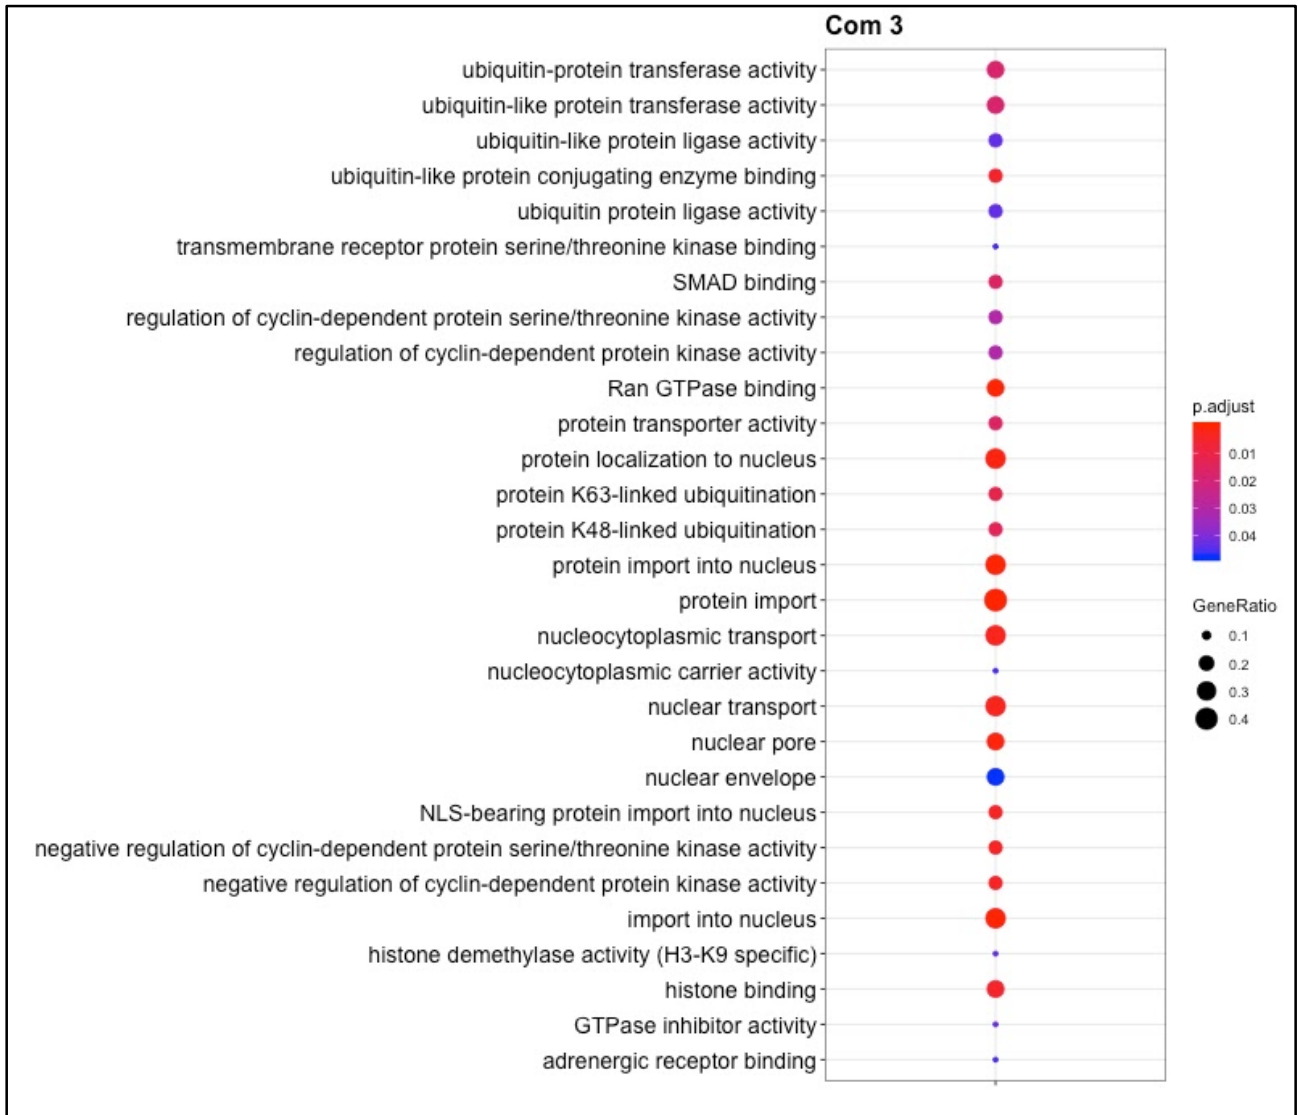

587

588



589 **Figure S15 Enriched GO-Terms for community 4**

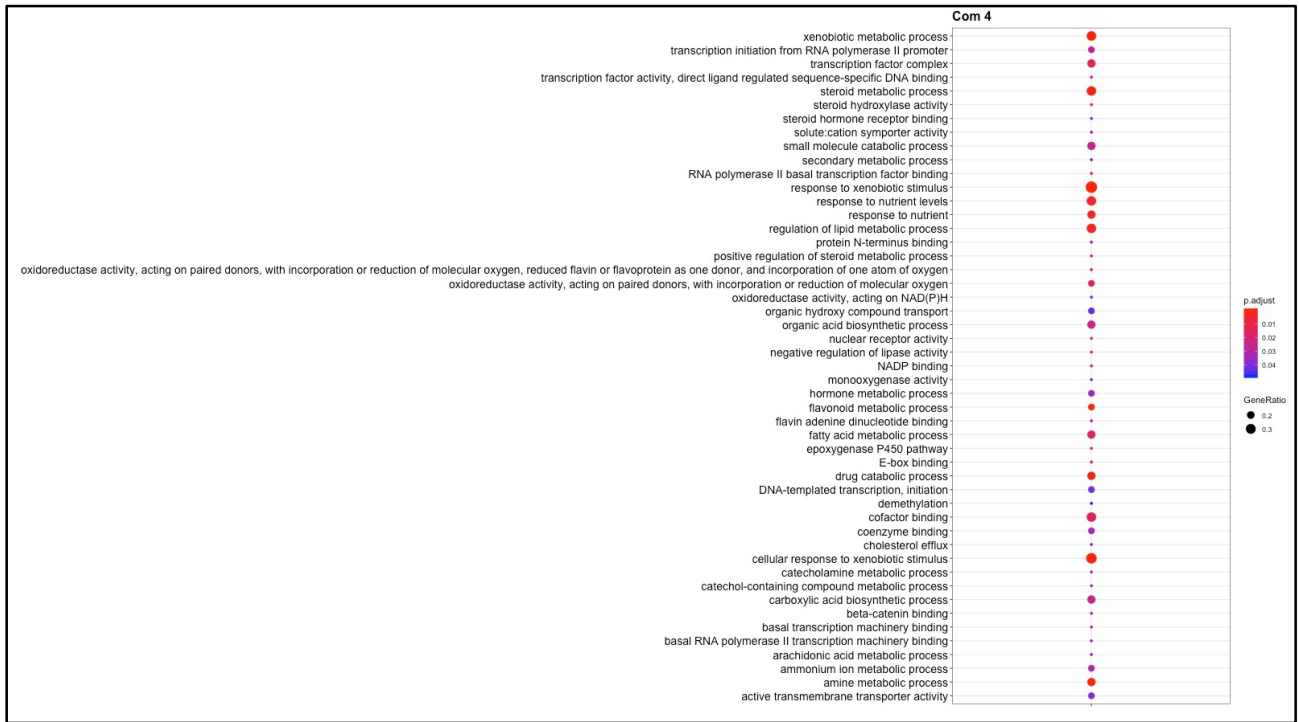

590

591 **Figure S16 Enriched GO-Terms for community 5**

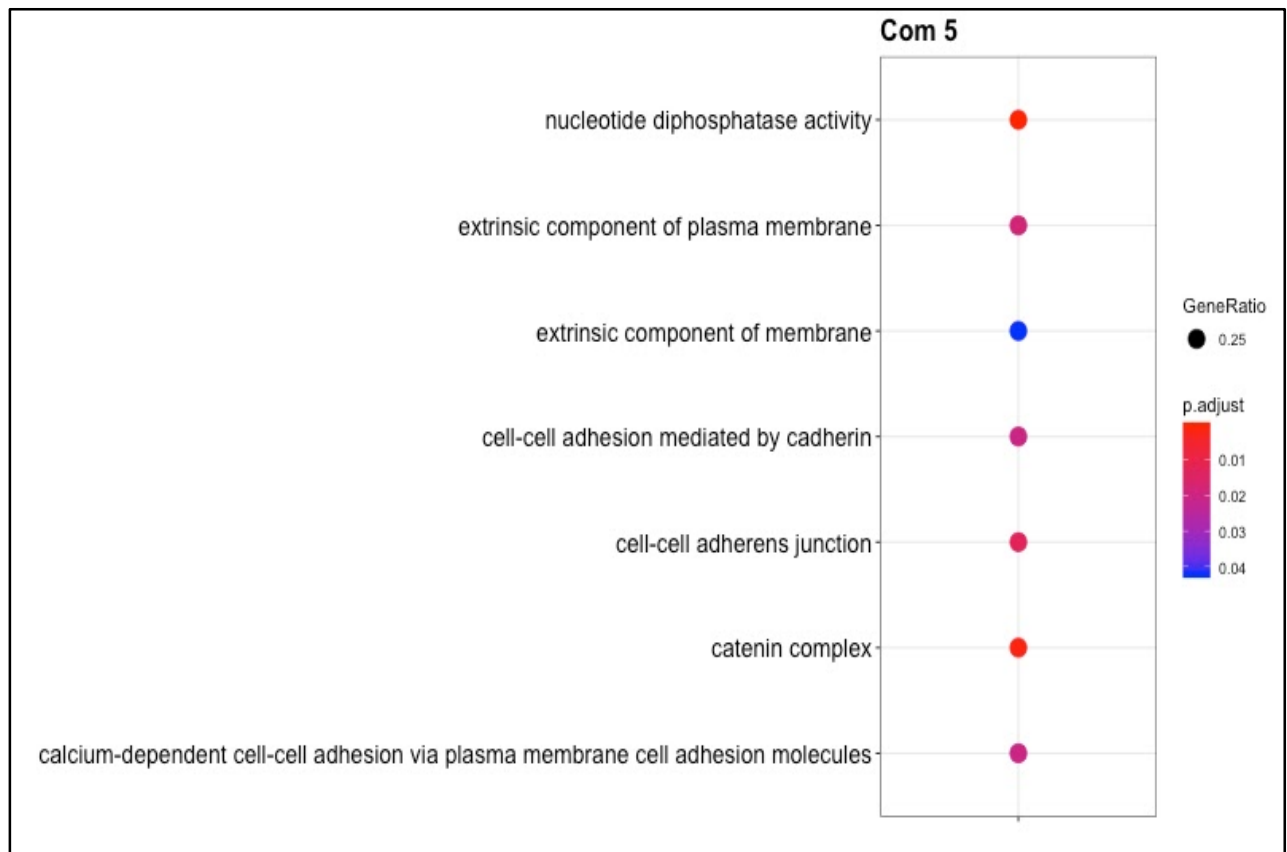

592

593

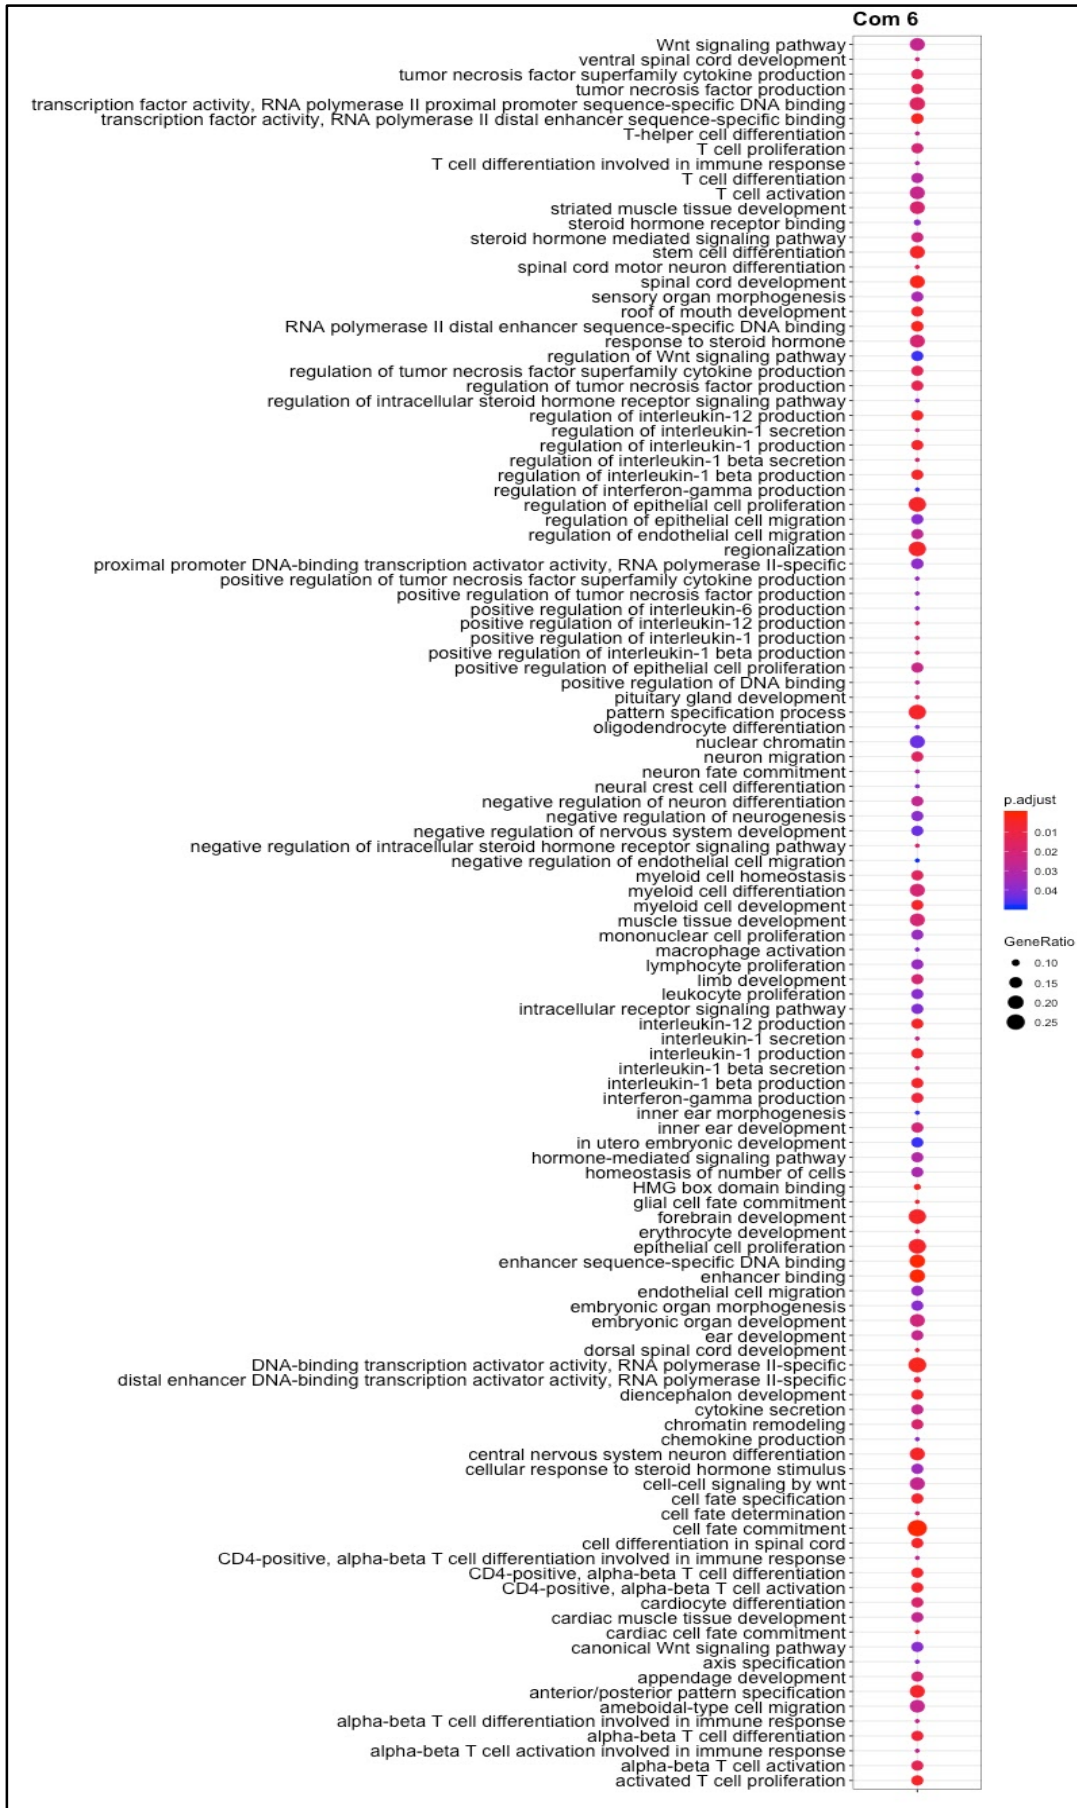

596 **Figure S18 Enriched GO-Terms for community 7**

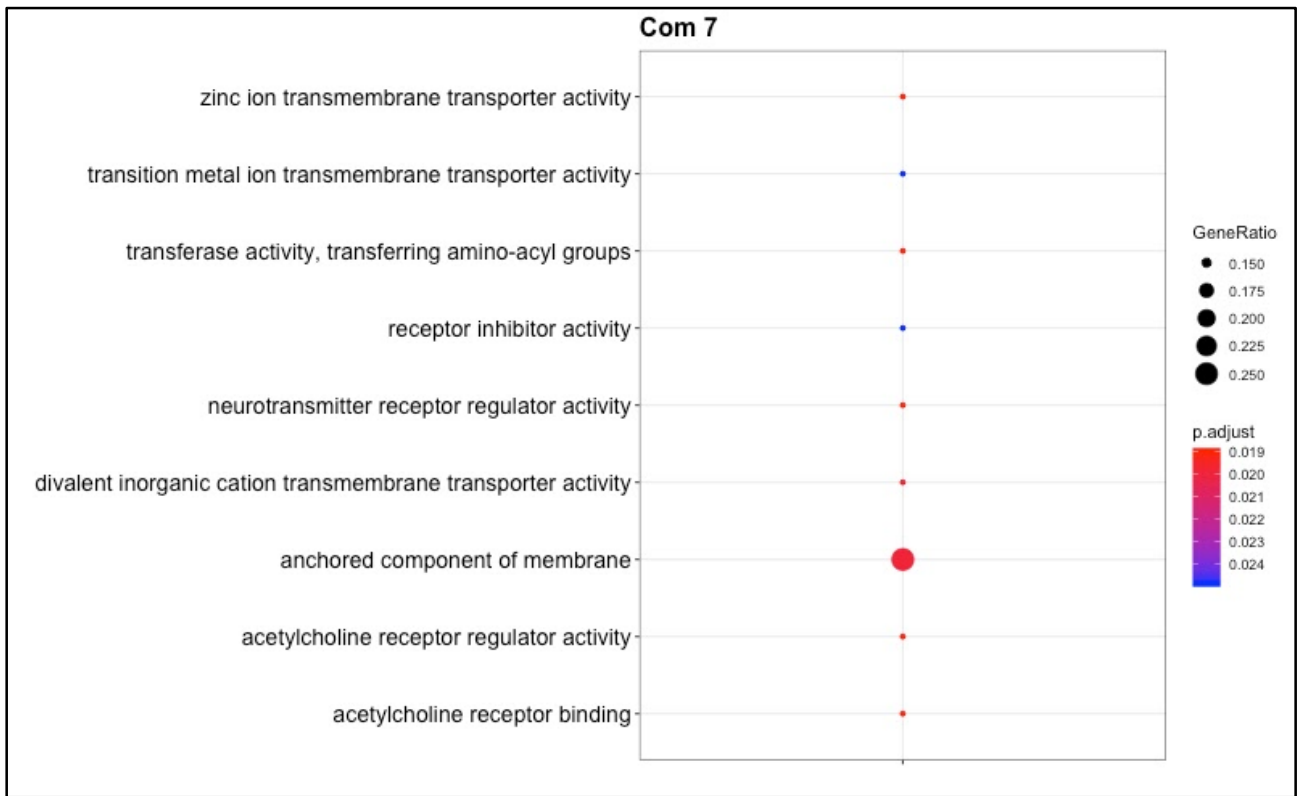

597

598

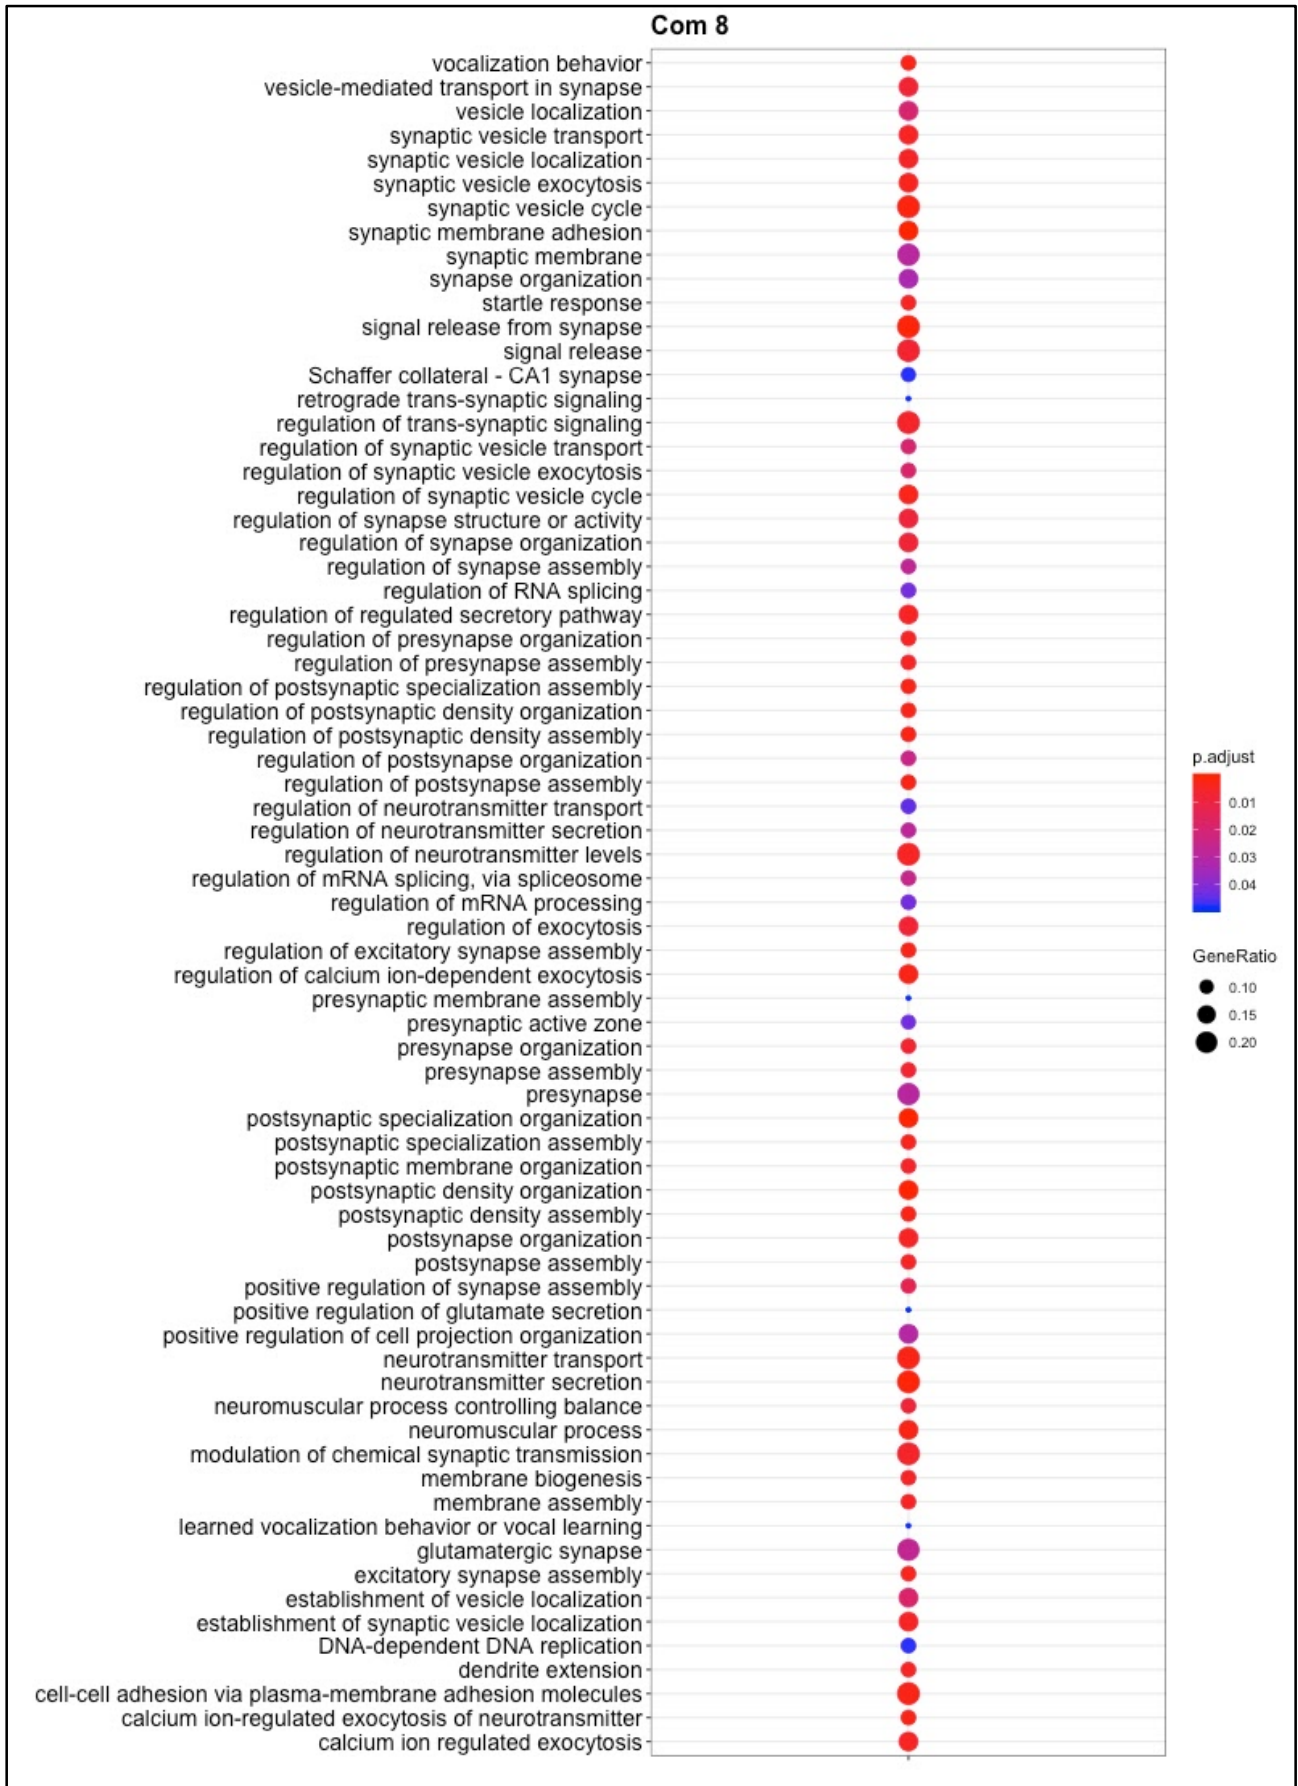

600

601

602 **Figure S20 Enriched GO-Terms for community 9**

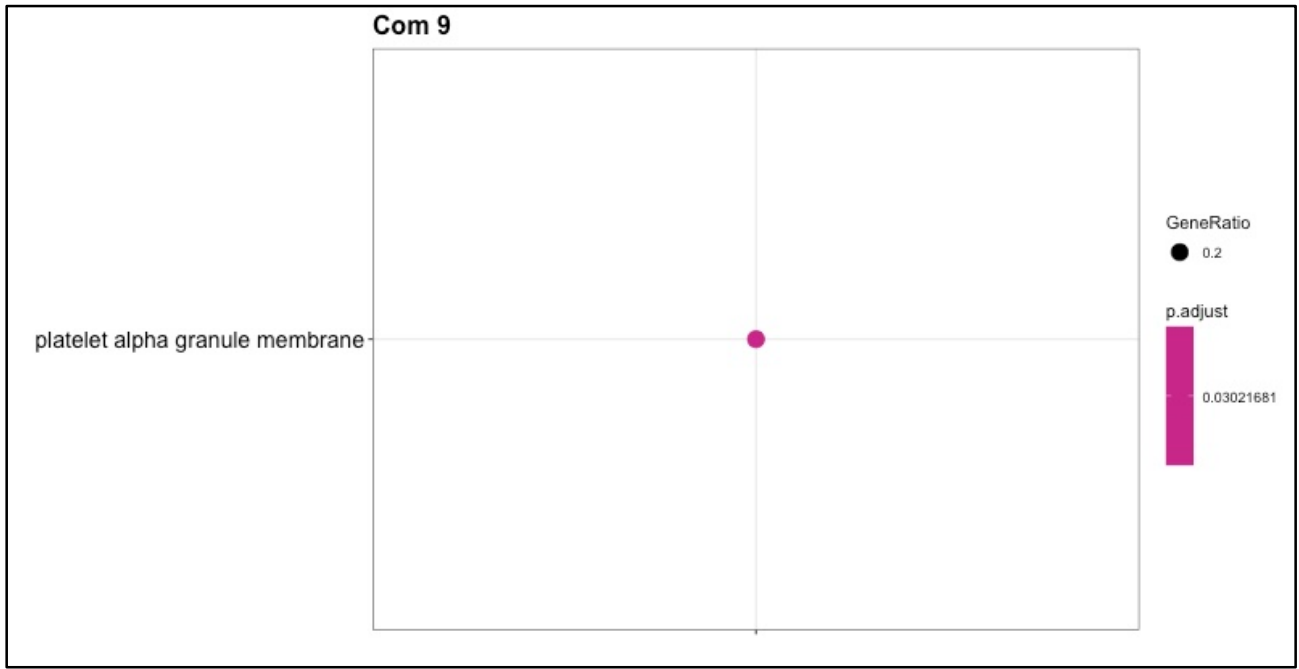

603

604 **Figure S21 Enriched GO-Terms for community 10**

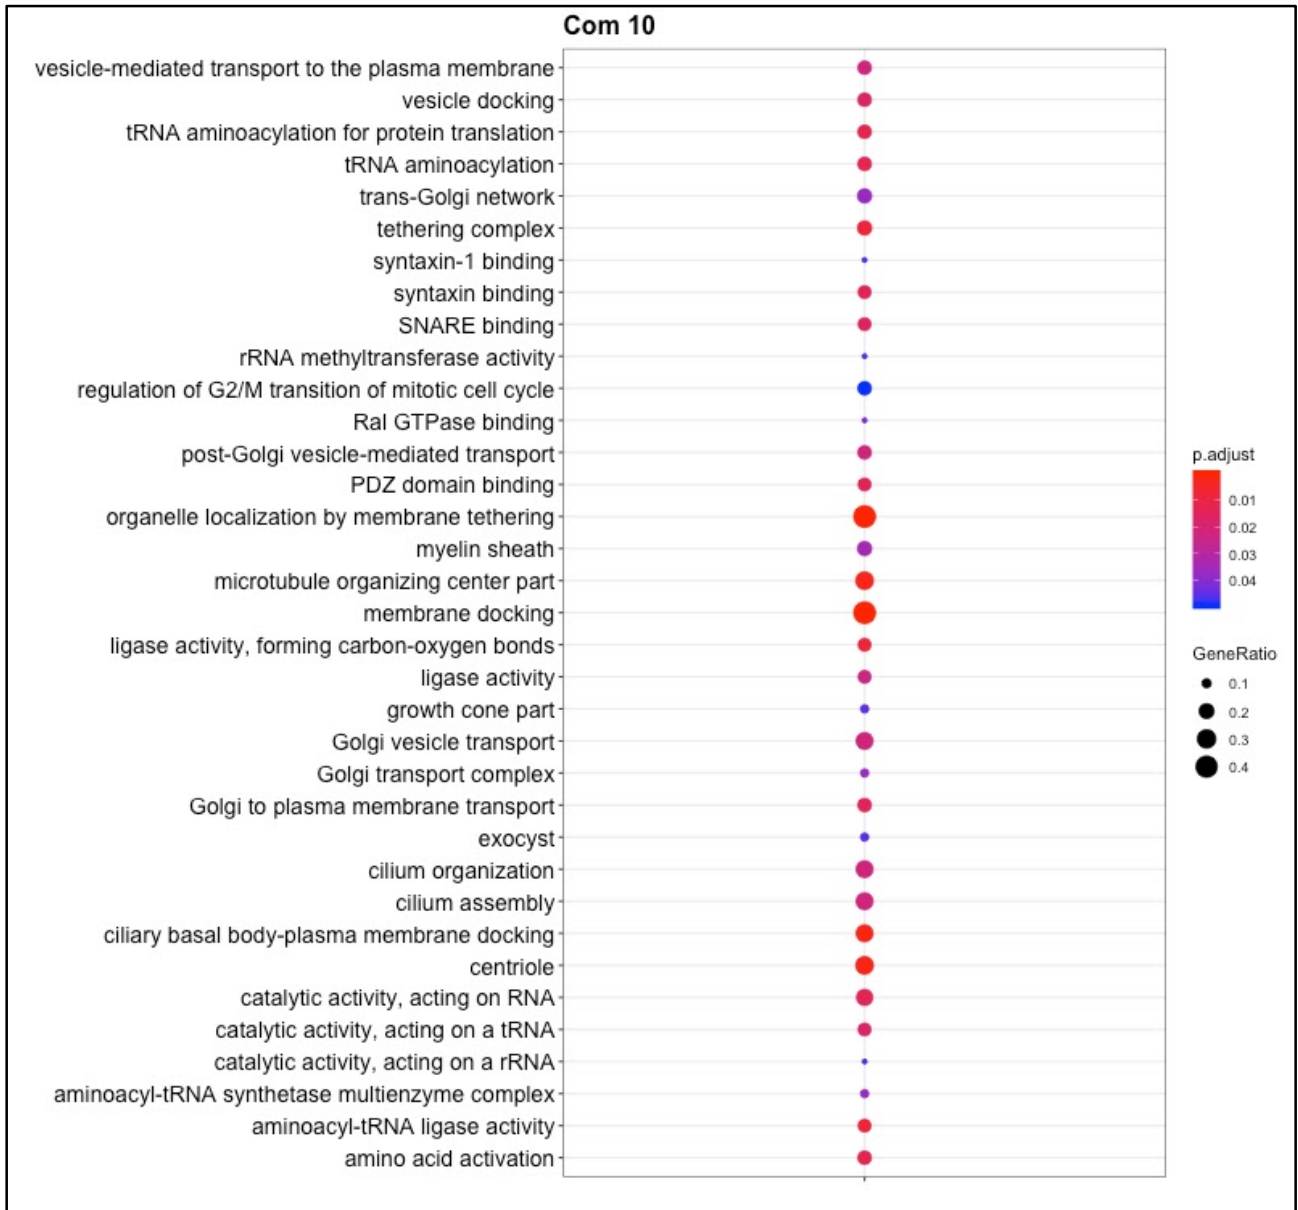

605

606

607  
608  
609  
610

**Figure S22. Selected forest plots of MR-estimated effect sizes.** For each of the six examples described in the main text. Exposure trait, outcome trait, effect size and 95% confidence intervals are reported. Abbreviations: CHD Coronary Heart Disease, BMI Body Mass Index, TG Triglycerides, MI Myocardial Infarction, TC Total Cholesterol, WC Waist Circumference, WHR Waist to Hip Ratio, WHR|BMI Waist to Hip Ratio BMI adjusted, LDL Low Density Lipoprotein

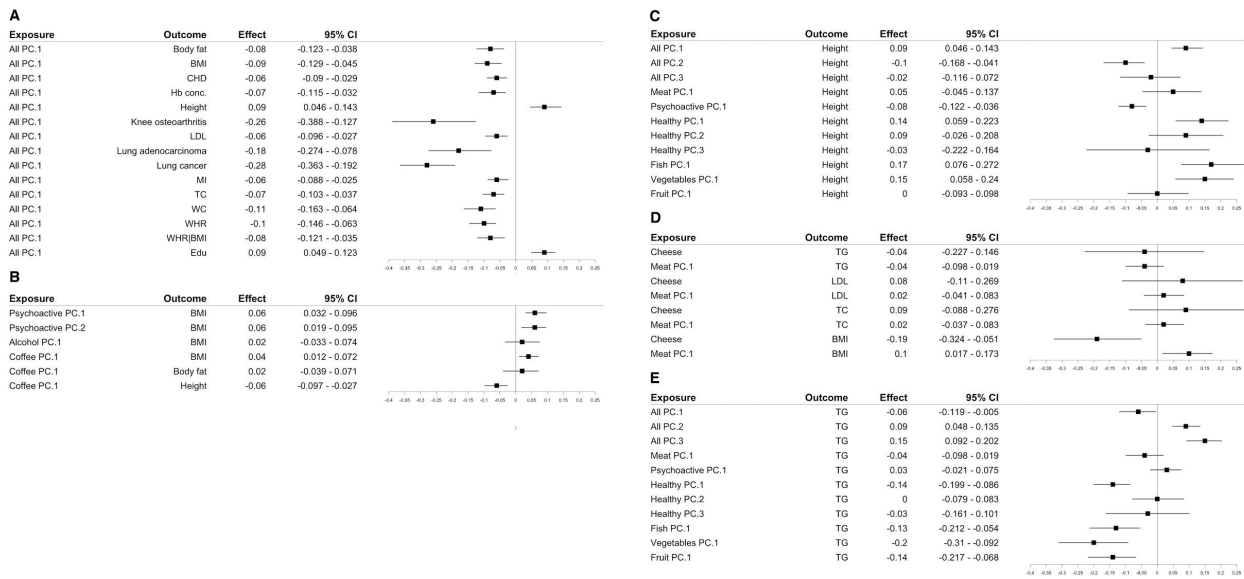

611  
612



613 **Figure S23 Effect of food on obesity related measures.** The forest plot compares the effect of each food trait on four  
 614 obesity related measures: BMI, Body Fat, Waist to Hip Ratio (WHR) and BMI adjusted WHR (WHR|BMI). Each color and  
 615 shape represents a different obesity related measure while the transparency of the points and error bars are proportional  
 616 to the strength of association.

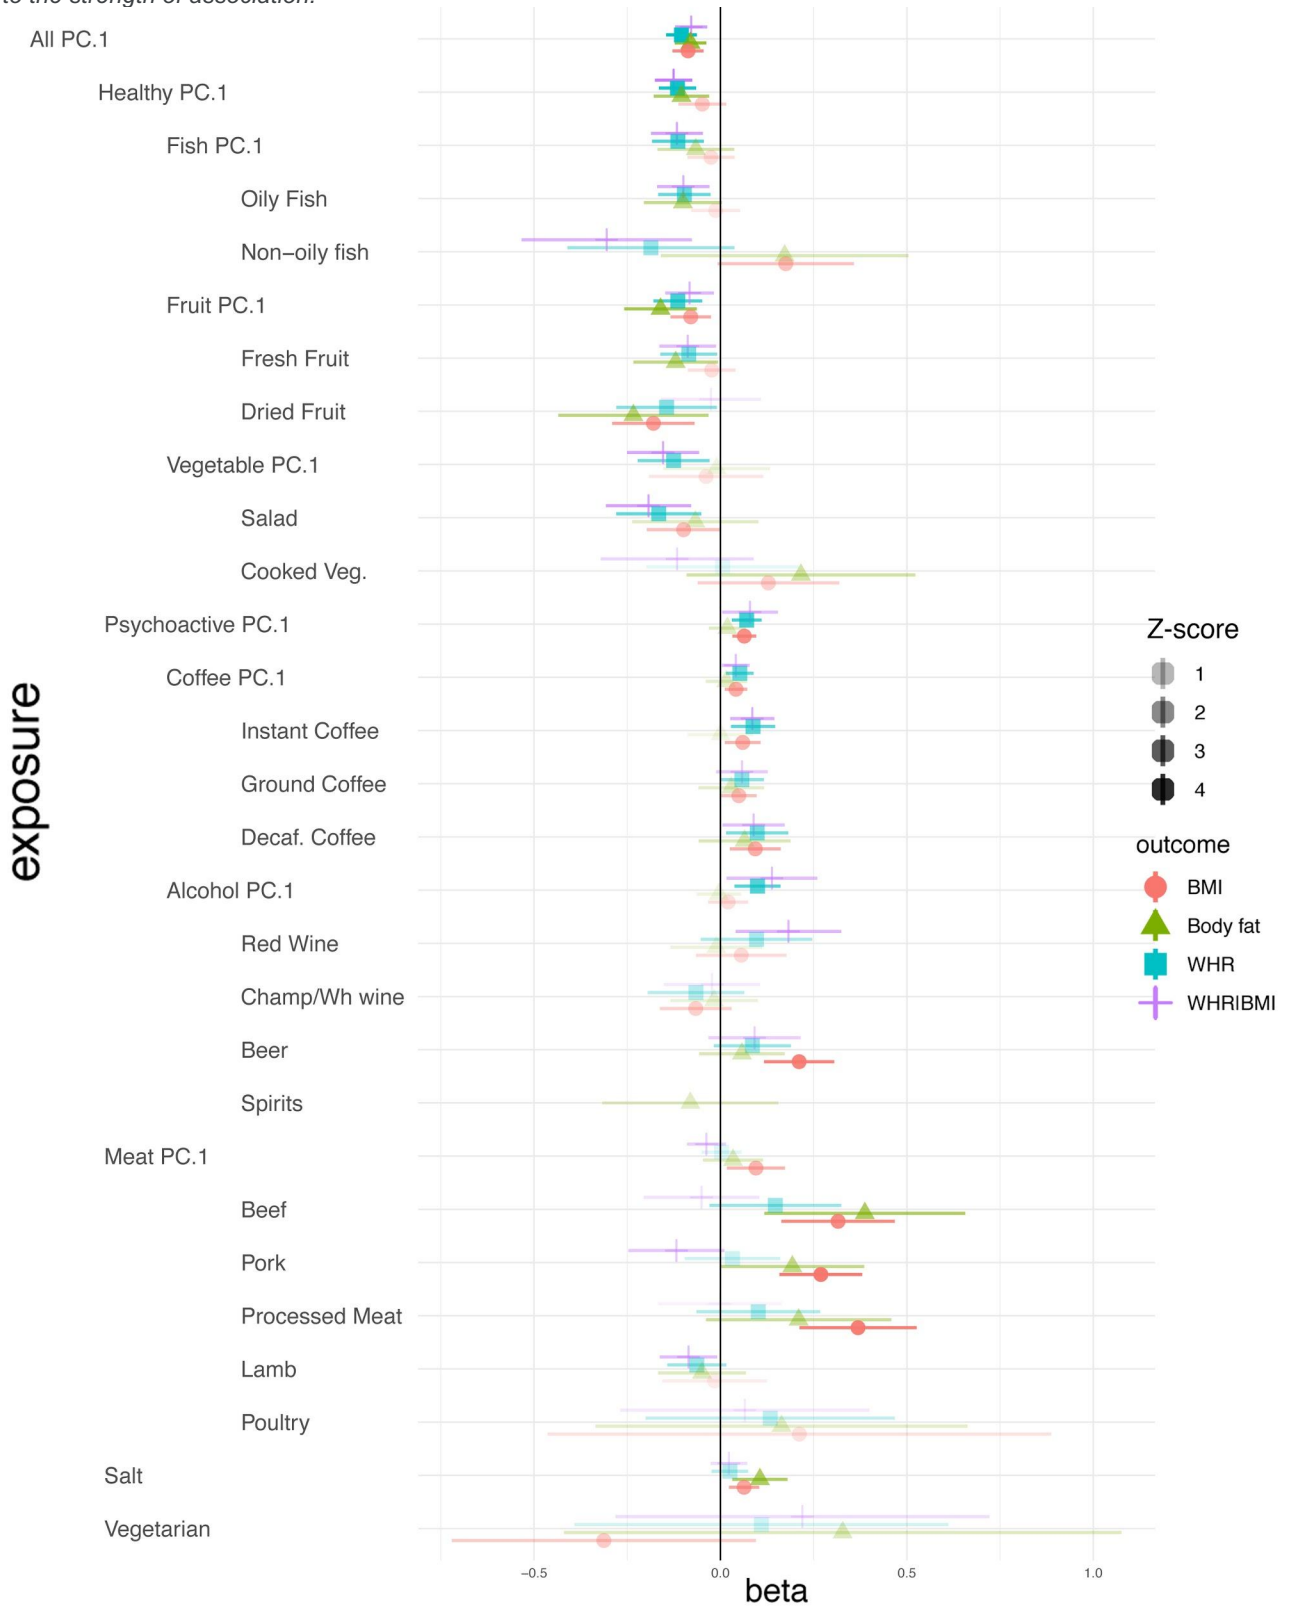

617

618

619



620 **2.6 Significant results from the Raw uncorrected analysis.**

621

622 In order to understand what would have been the impact of performing MR without using CRR for  
623 filtering the IVs, we estimated Storey q-values using only the p-values coming from the Raw  
624 Uncorrected set of results. The following forest plots refer to these results and compare the Raw  
625 uncorrected results with the CRR filtered IVs using the uncorrected betas.

626 Of the 115 significant exposure/outcome pairs which resulted significant after multiple test  
627 correction only 26 were in common with those significant at the CRR filtered analysis. In many  
628 cases this is clearly due to an overestimation of the effect size. This is particularly evident when  
629 looking at Cheese which seems to have a large number of beneficial effects (7) which all disappear  
630 (apart from BMI which is diminished in any case) after selecting only the IVs with non-mediated  
631 effects. This is unsurprising given that Cheese was the food that had the largest proportion of  
632 genetic variance explained by the health related traits (~40%).

633 These results show how risky it is to make causal claims based on the naive analysis. In our case  
634 we could have used these results to make claims of a huge number of beneficial effects of Cheese  
635 which do seem to be true and are likely due to the fact that people who consume a larger amount  
636 of cheese have a higher education and lower cholesterol which is thus creating the confounding  
637 effect. This is of particular importance as MR is generally considered (when performed properly) a  
638 sturdy and reliable method of testing causal relationships. However we have shown that there can  
639 be issues and particular care should be used when human behaviour is involved in the definition of  
640 the exposure trait.

641 A slightly different example is the case of dried fruit were, despite none of the effects are still  
642 significant after using the CRR filtered IVs, comparing the forest plots seems to suggest that this  
643 difference is in some cases due to an actual difference in effect size (Years of schooling, Lung  
644 Cancer and Ovarian Cancer) while in the rest of the cases the difference is due to a loss in power  
645 which has led to an increase in the standard errors of the estimates.

646 It is unfortunately impossible to perform a direct test of the difference in estimates as the wide  
647 confidence intervals of the MR estimates do allow to have enough power to detect the differences.

648 This problem will be overcome in the future through the increase in power due to the increasing  
 649 size of GWAS studies but at the moment we are not able in many cases to distinguish which  
 650 associations are not significant any more due to power or difference in effect size. We have  
 651 however reported the forest plot comparing the two methods and have provided an online tool that  
 652 each researcher can evaluate all the different estimates coming from different methods and thus  
 653 make up their own mind based also on external evidence.

654 **Fig S24-S50 Forest plots of the exposure/outcome pairs significant at the raw analysis.**  
 655 The forest plots represent the estimated effect sizes for all the non CRR filtered MR analyses. The squares represent the  
 656 point estimates while the bars the 95% confidence intervals. Results from the Raw analysis (raw) and CRR filtered IVs  
 657 (CRR) are reported. The exposure trait is indicated in the header of the plots while the row labels refer to the outcomes.  
 658 Beta's always refer to standard deviations for the exposure while for the outcomes it is standard deviations for the  
 659 quantitative traits and log(OR) for the disease traits.

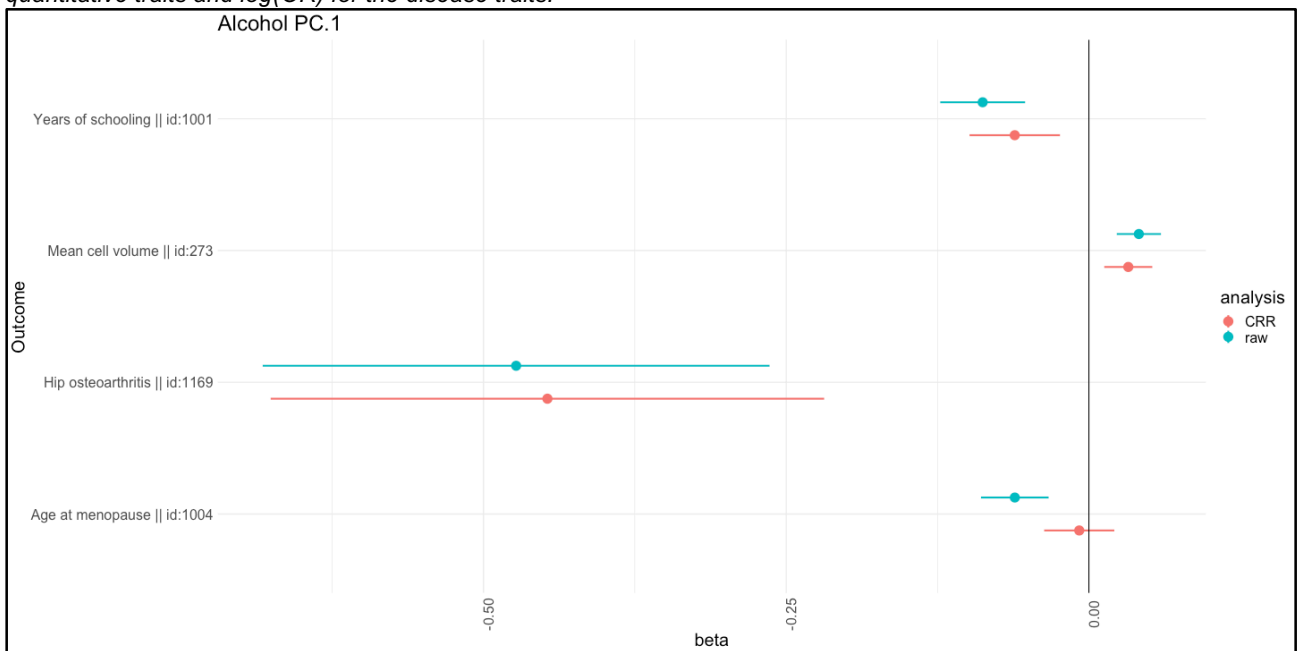

660  
661

**Fig S25**

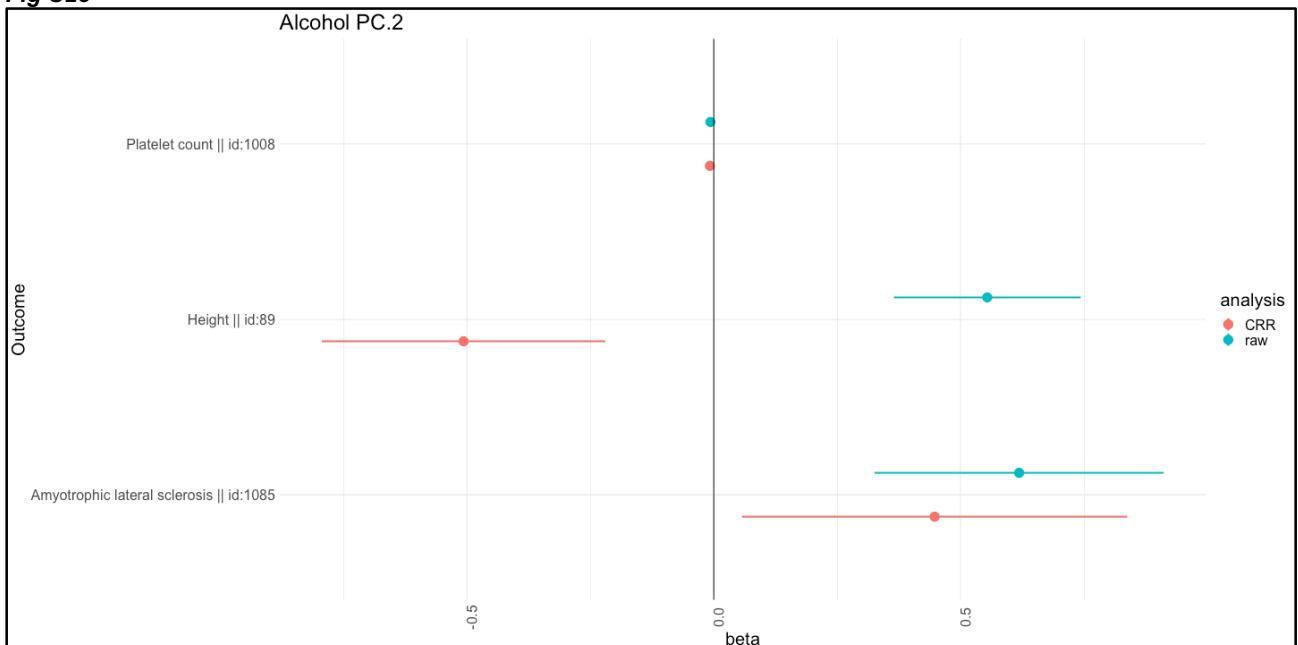

662

663 Fig S26

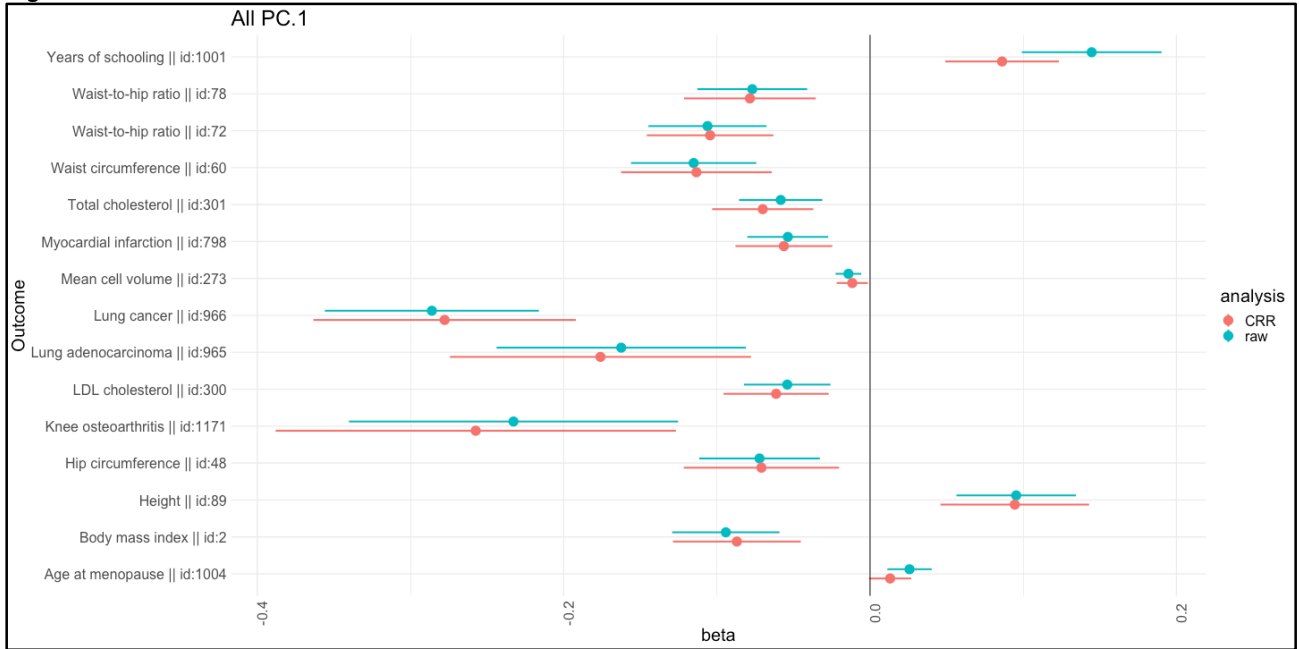

664 665 Fig S27

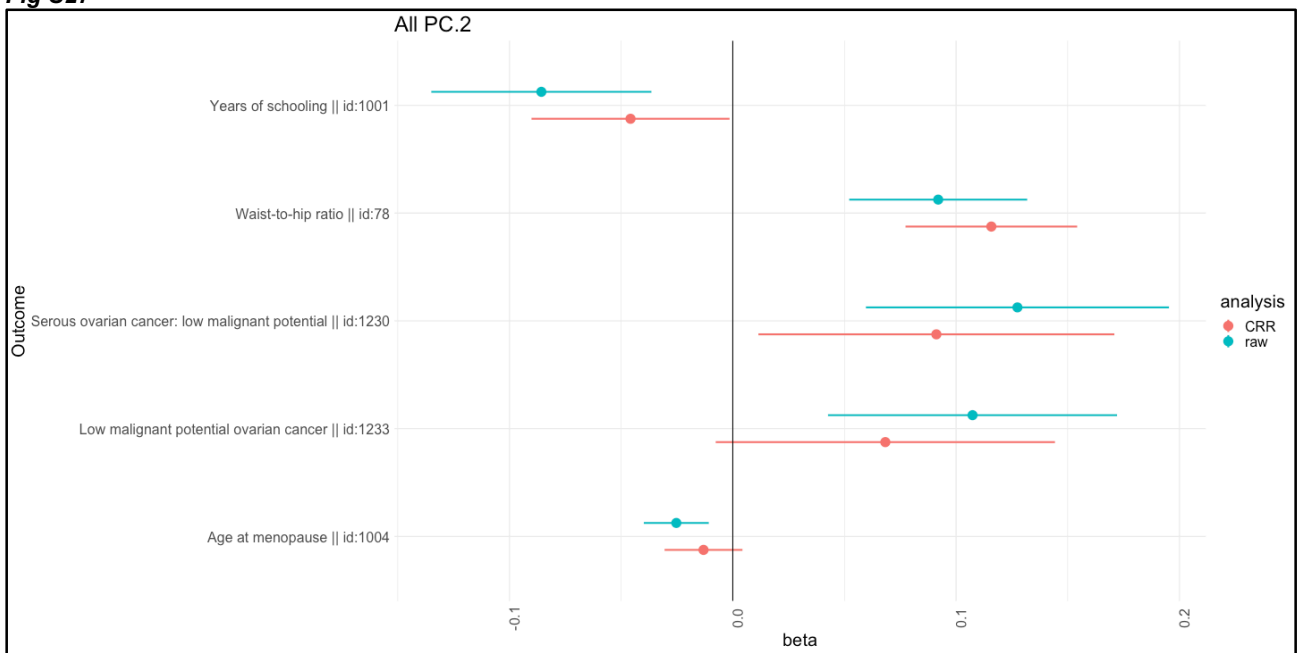

666

667 **Fig S28**

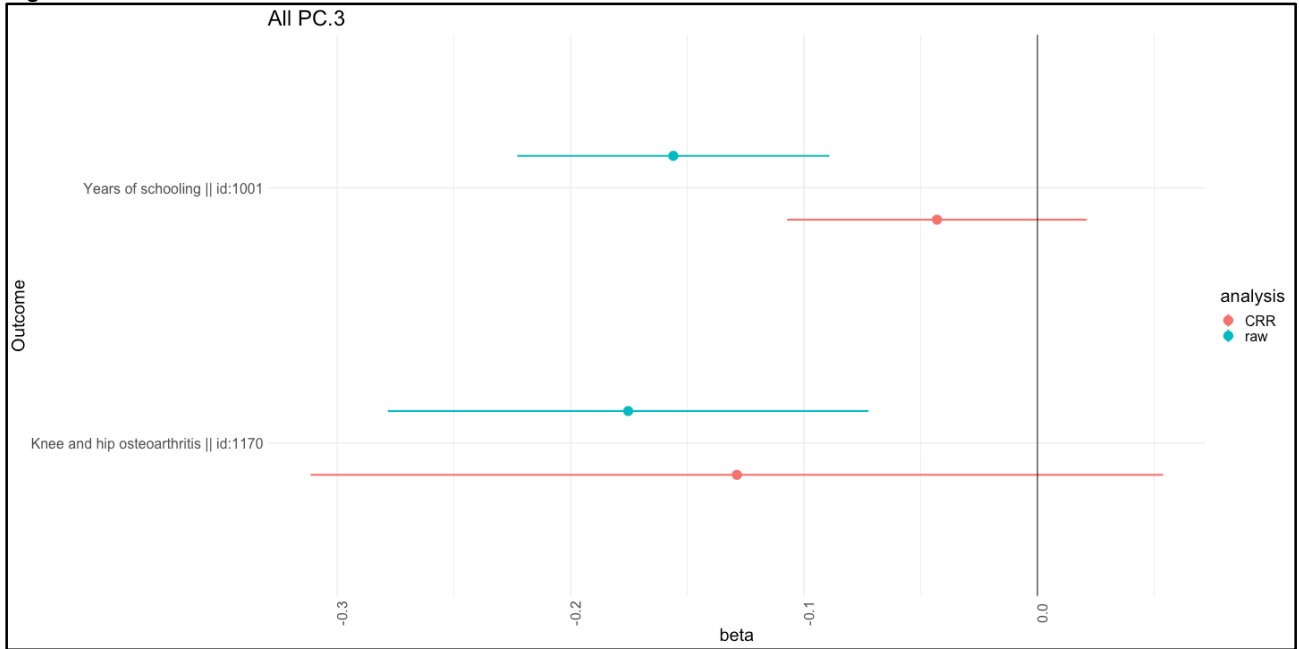

668  
669 **Fig S29**

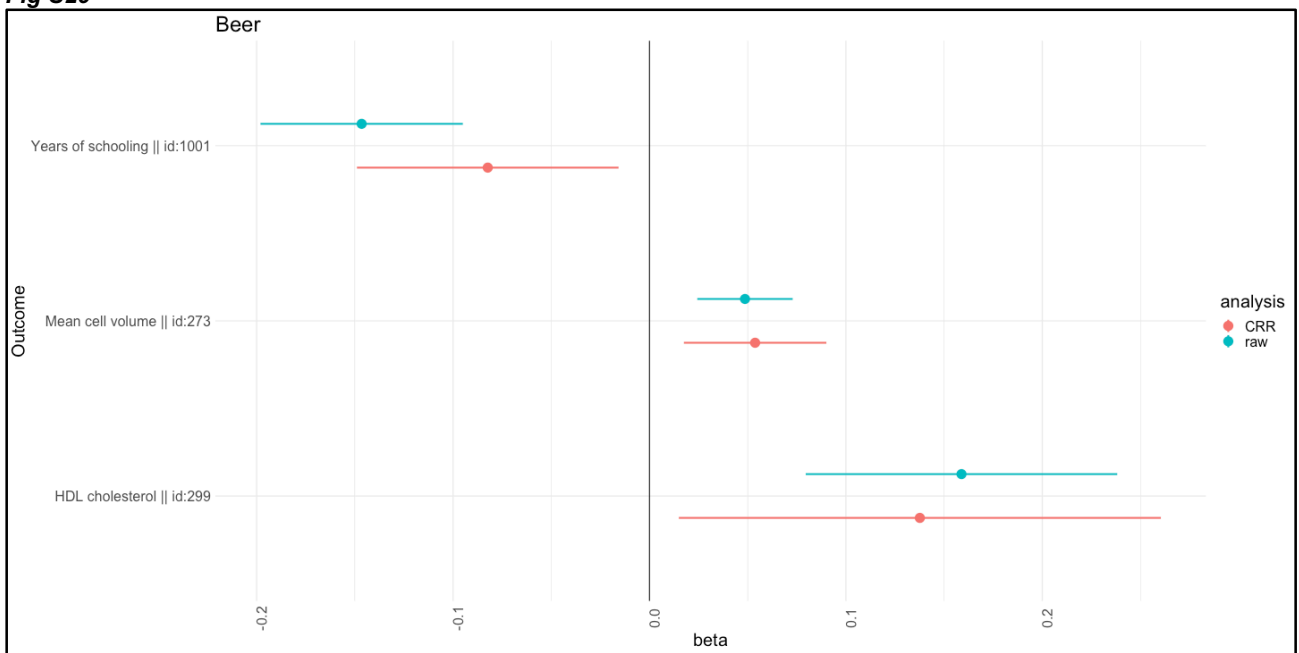

670

671 Fig S30

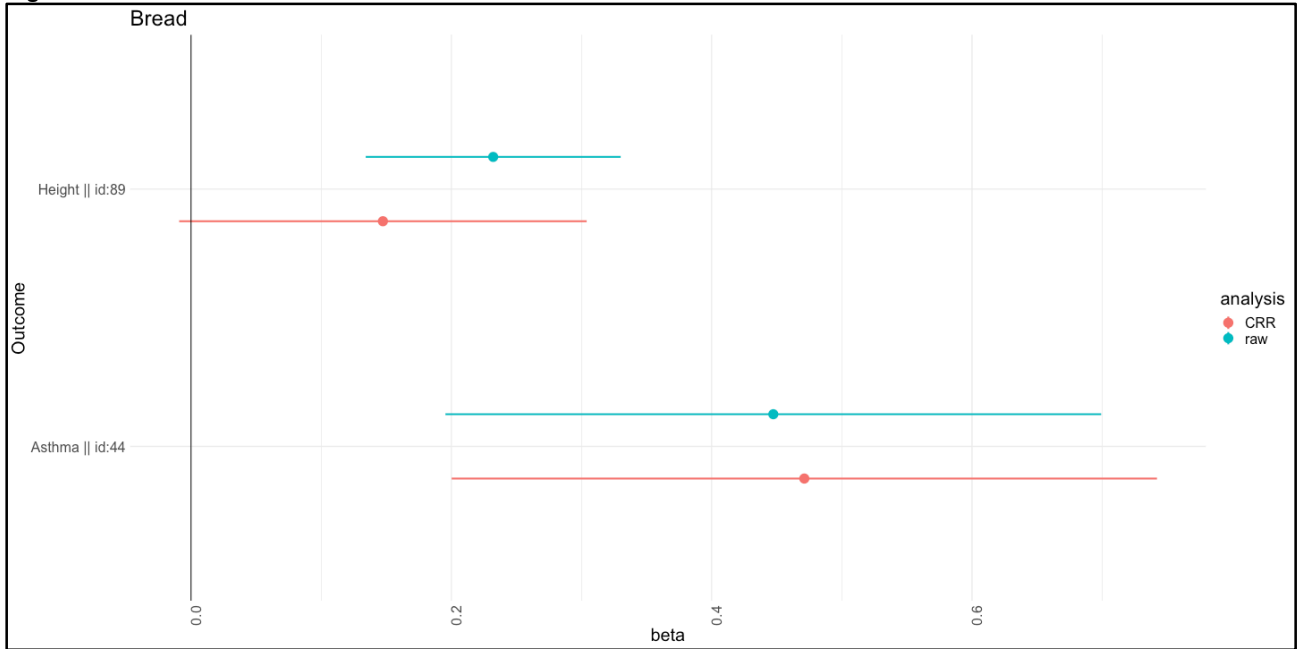

672  
673 Fig S31

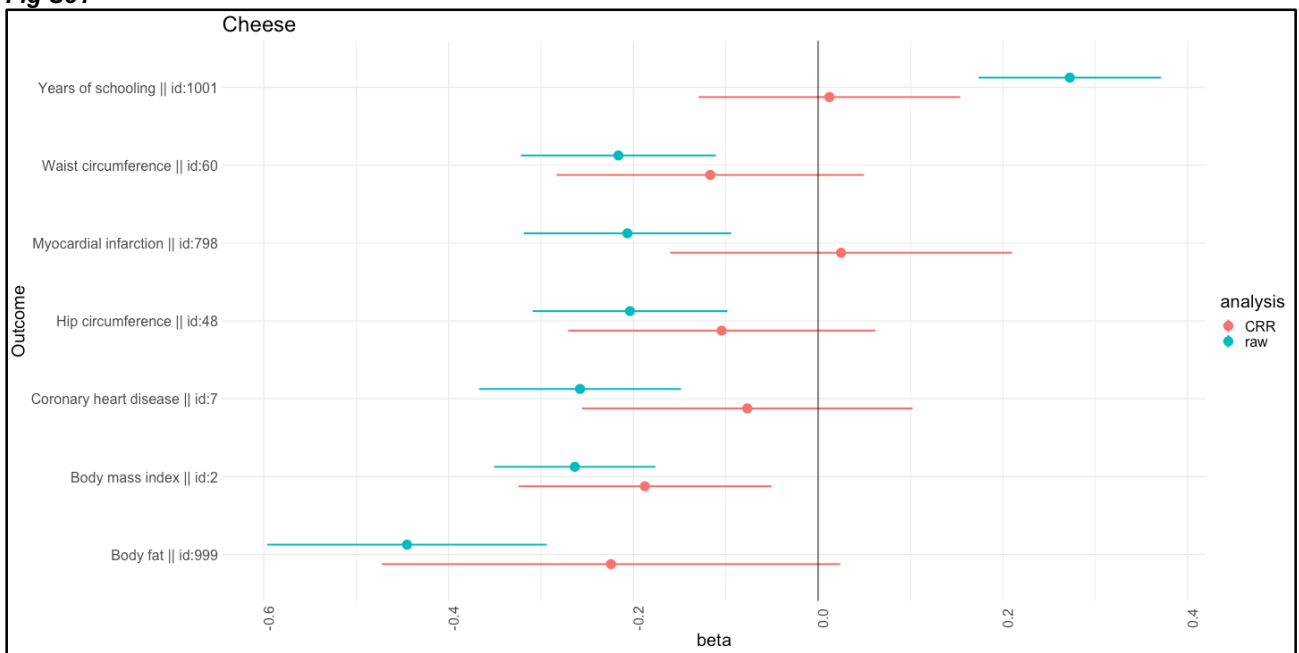

674

675 **Fig S32**

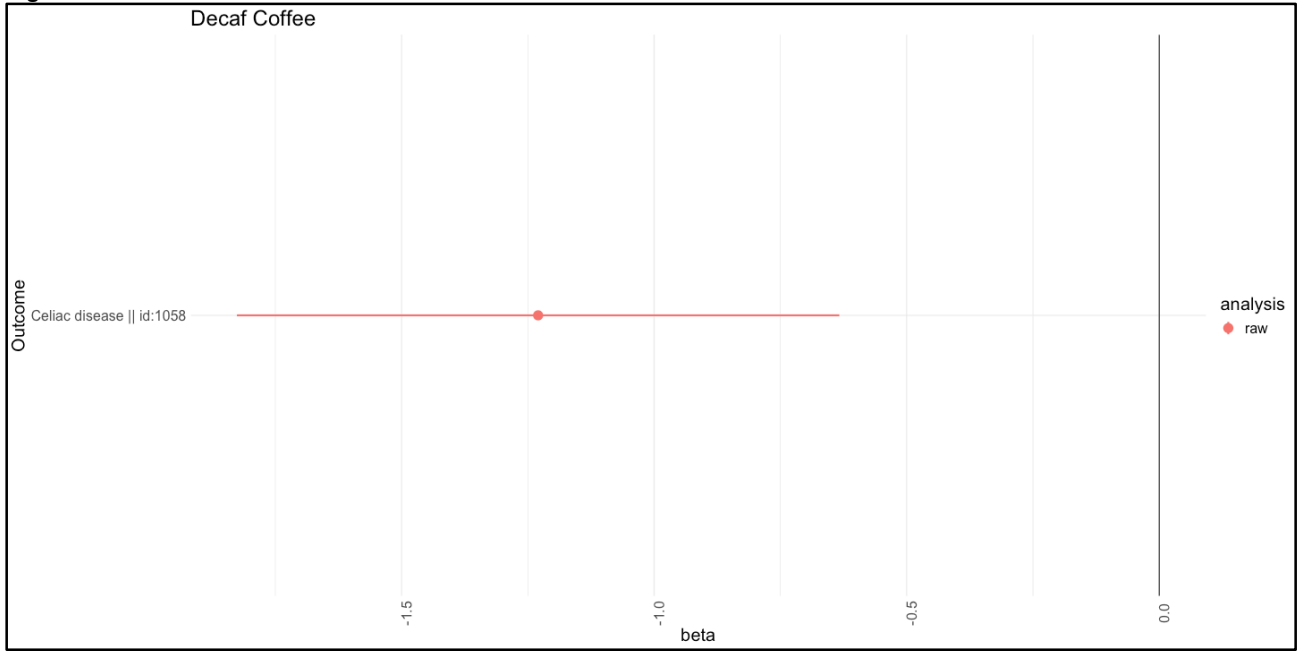

676  
677 **Fig S33**

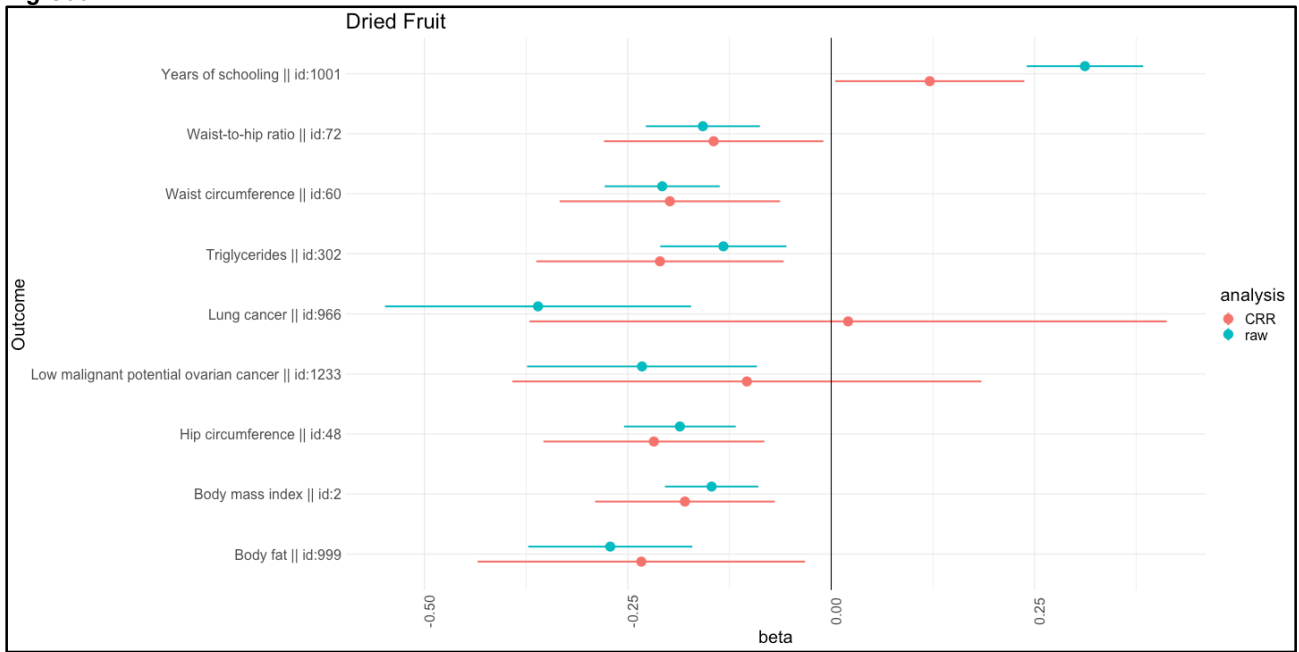

678

679 **Fig S34**

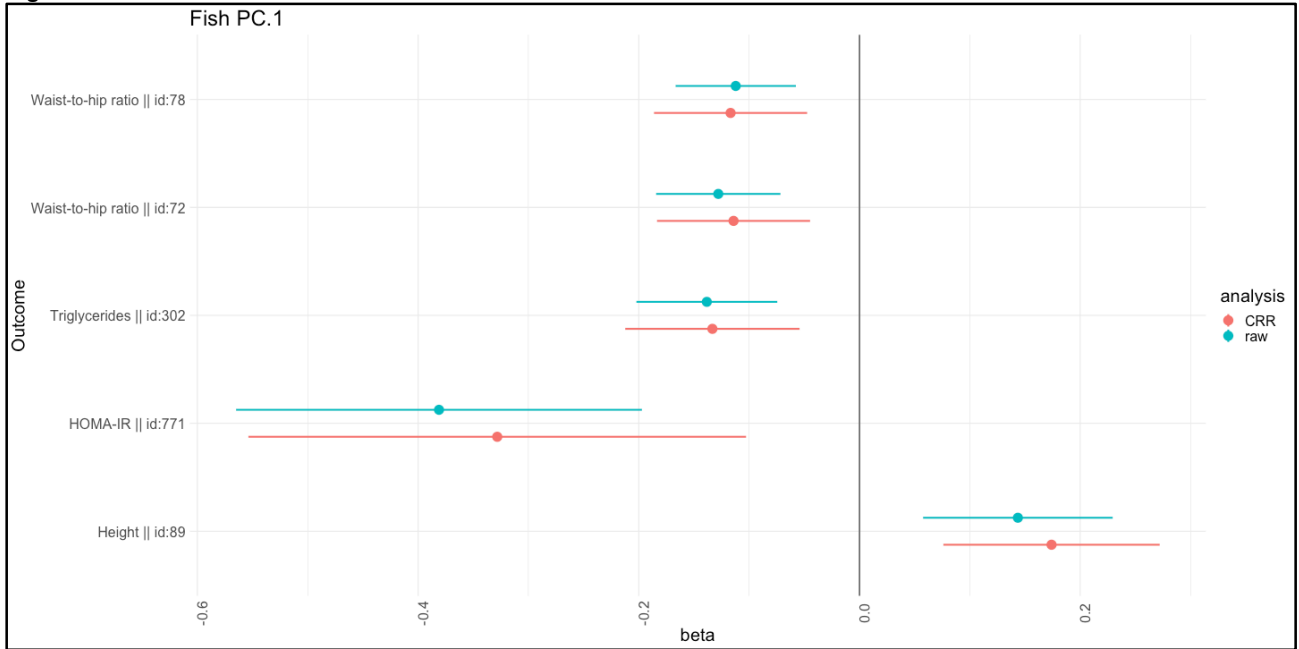

680  
681 **Fig S35**

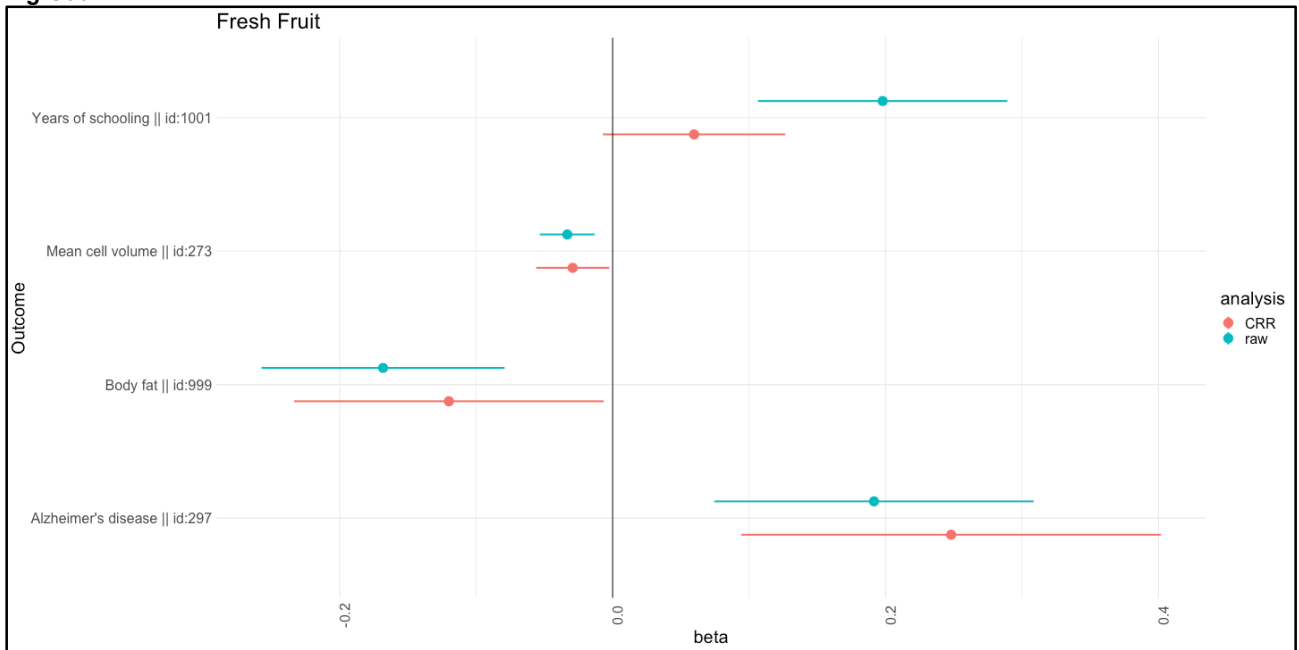

682

683 **Fig S36**

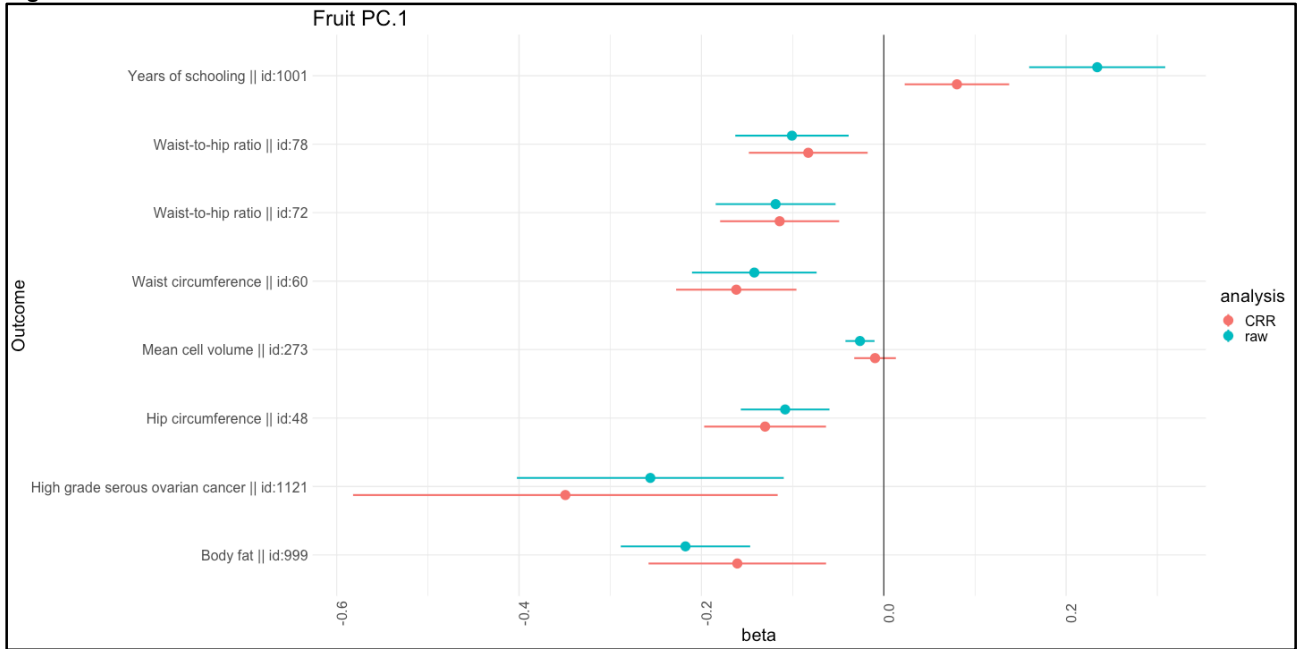

684  
685 **Fig S37**

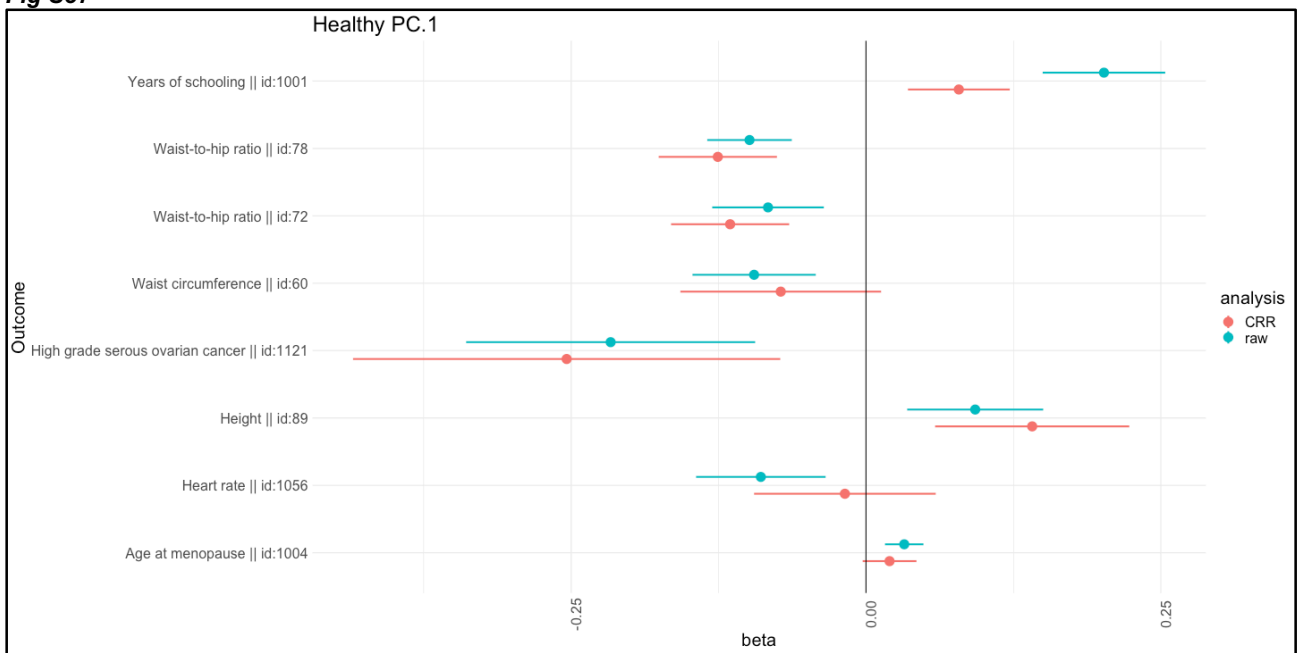

686



687 **Fig S38**

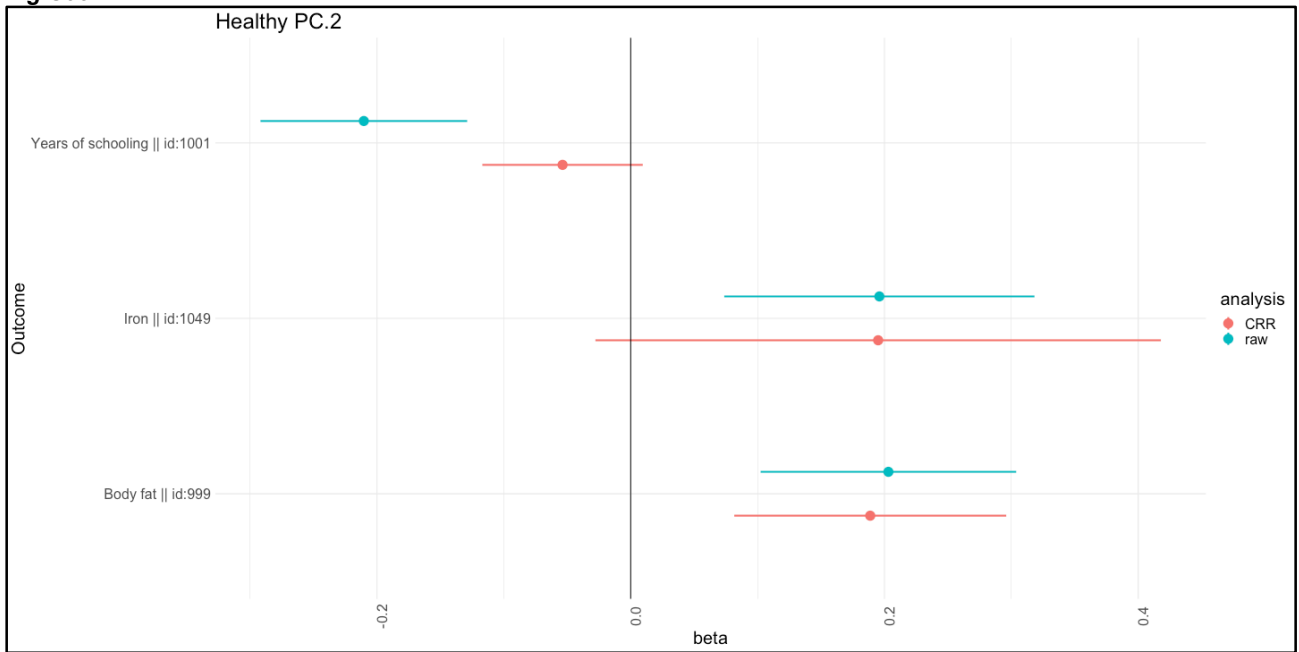

688  
689 **Fig S39**

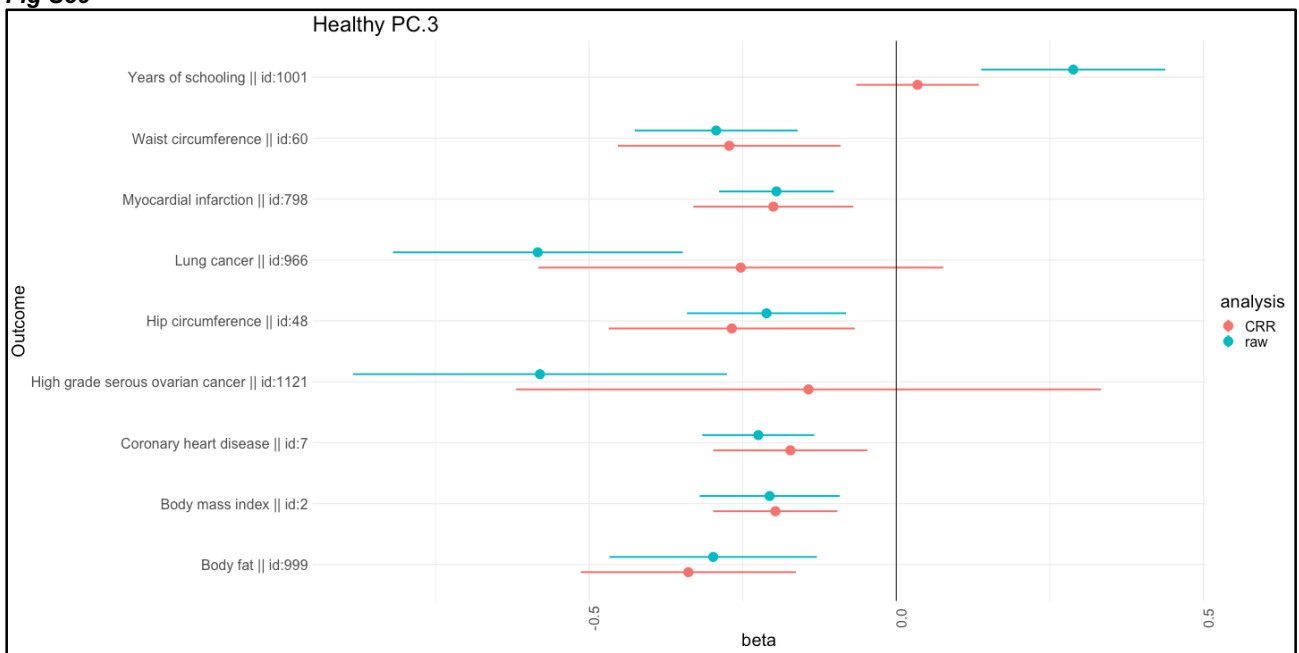

690

691

**Fig S40**

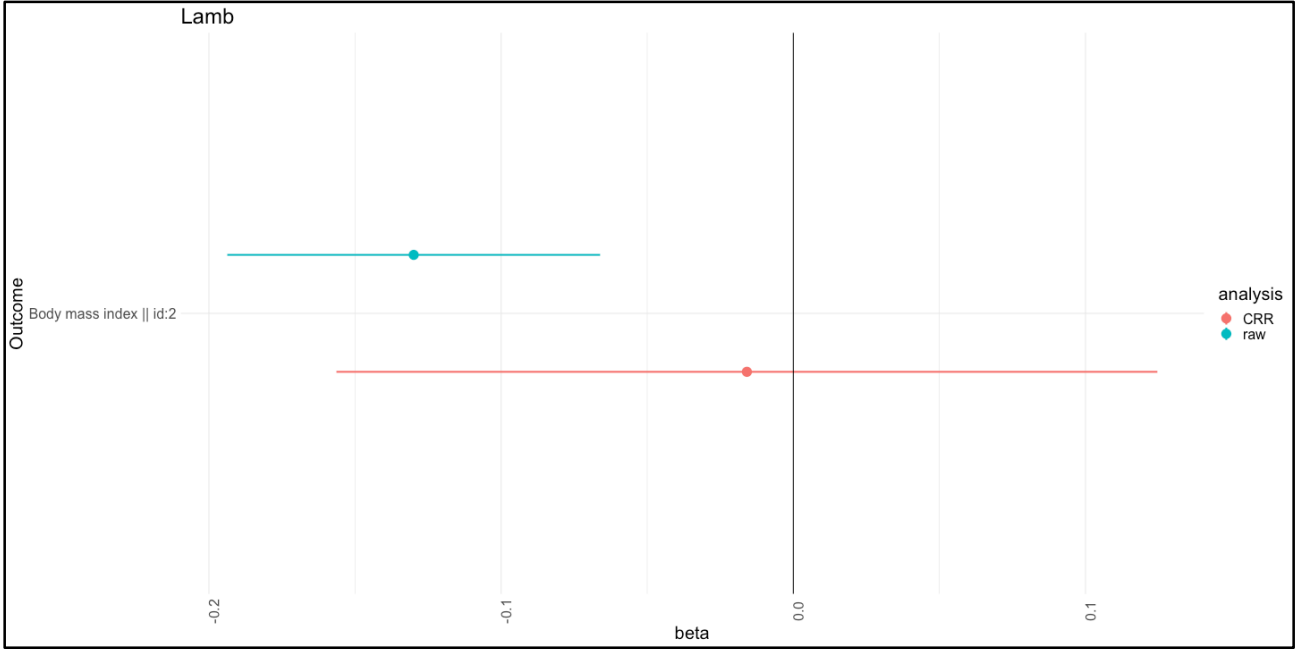

692

693

**Fig S41**

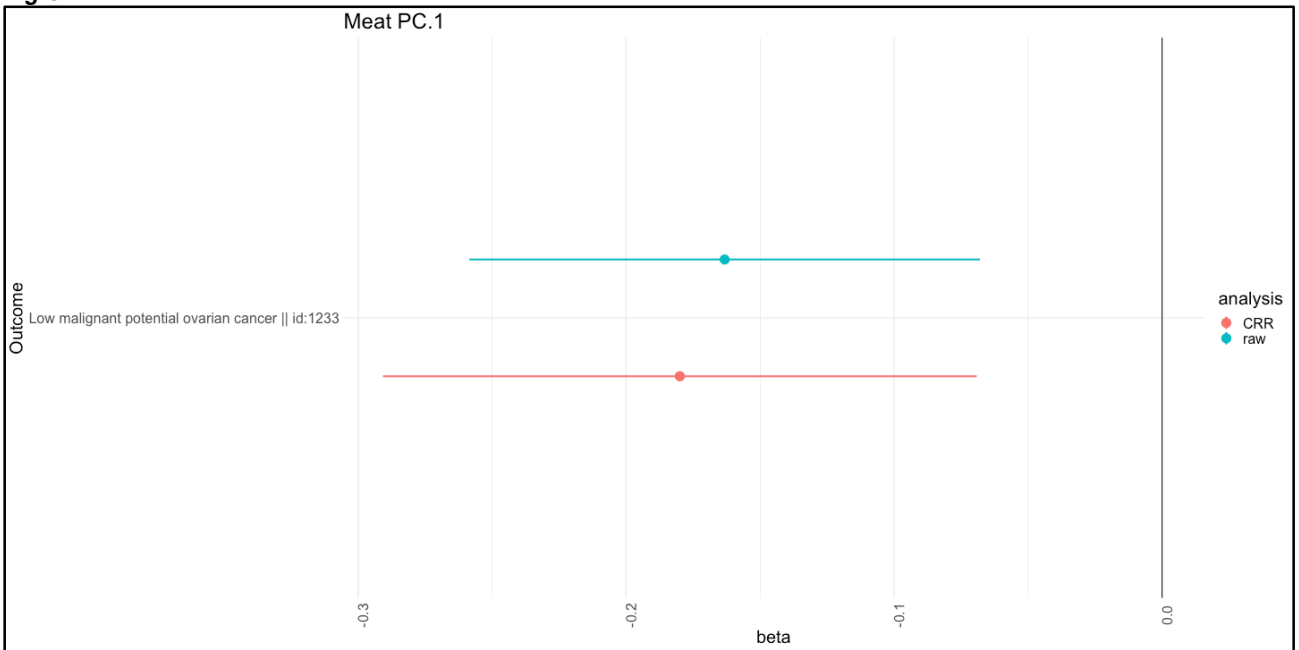

694

695 **Fig S42**

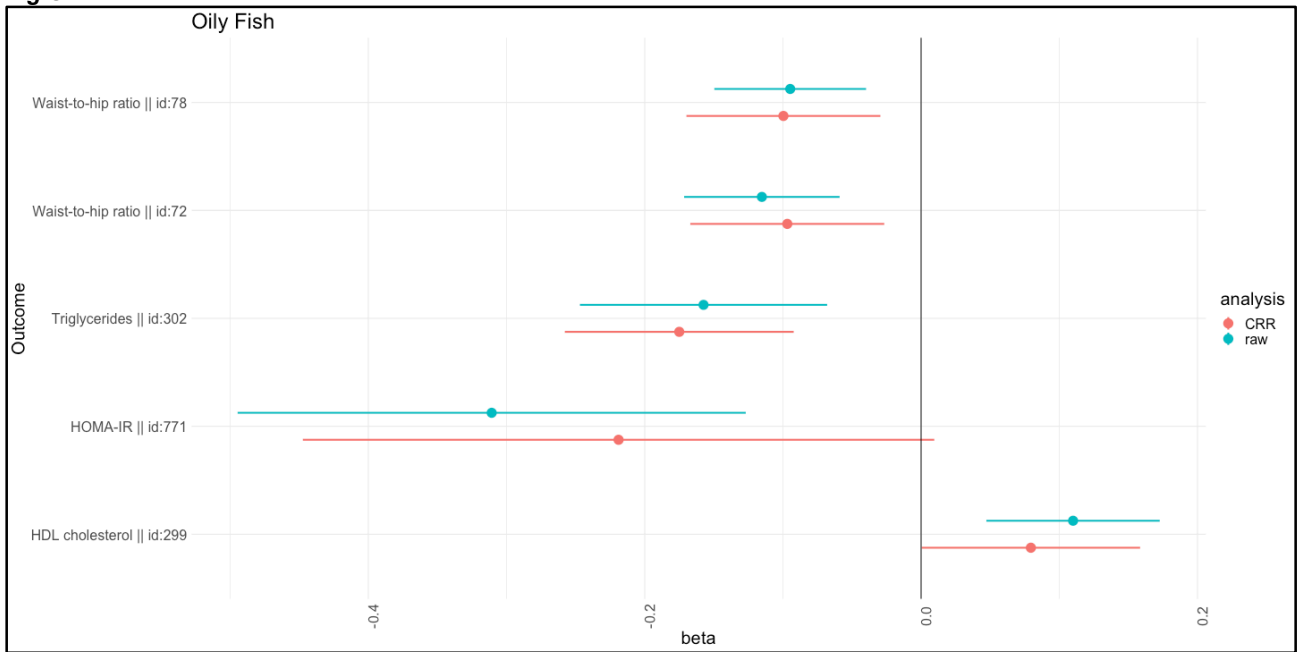

696 **Fig S43**

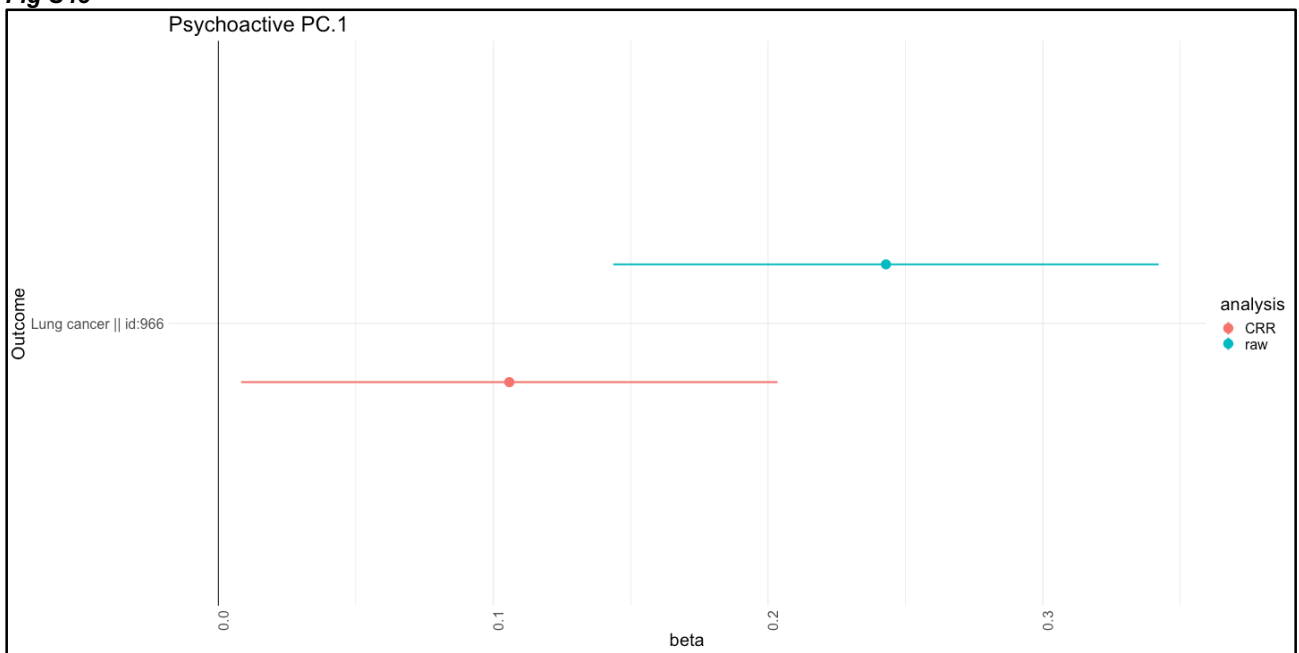

698

699 **Fig S44**

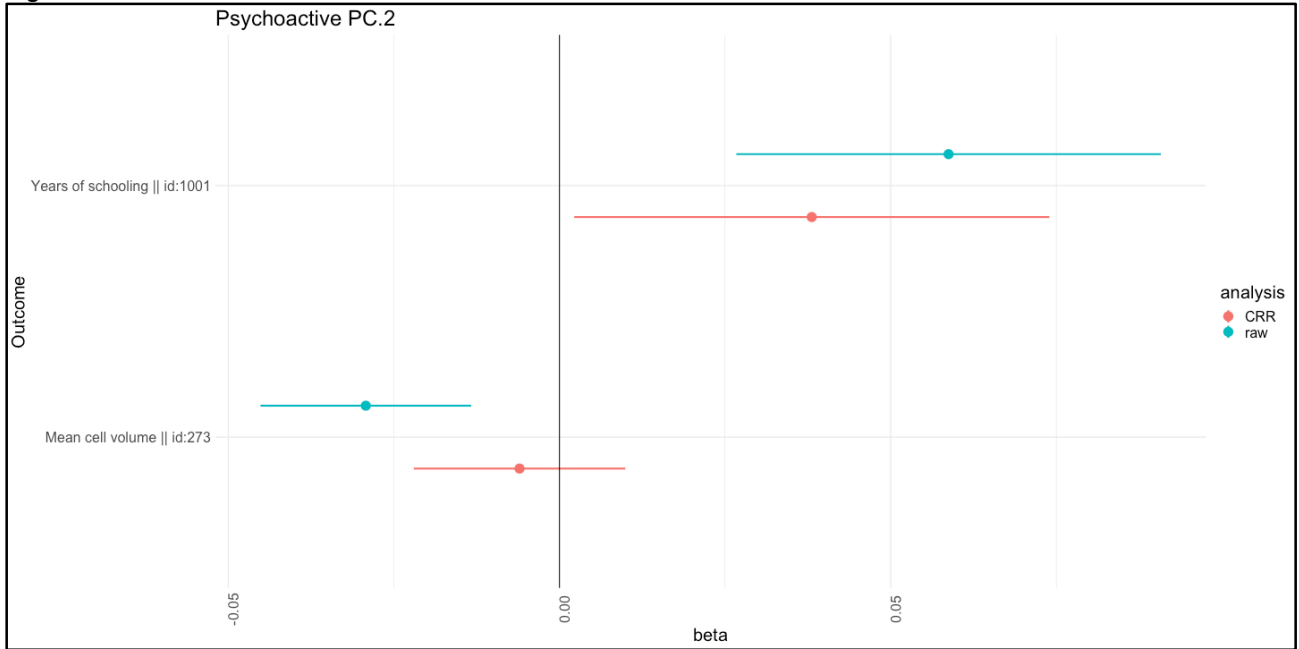

700 **Fig S45**

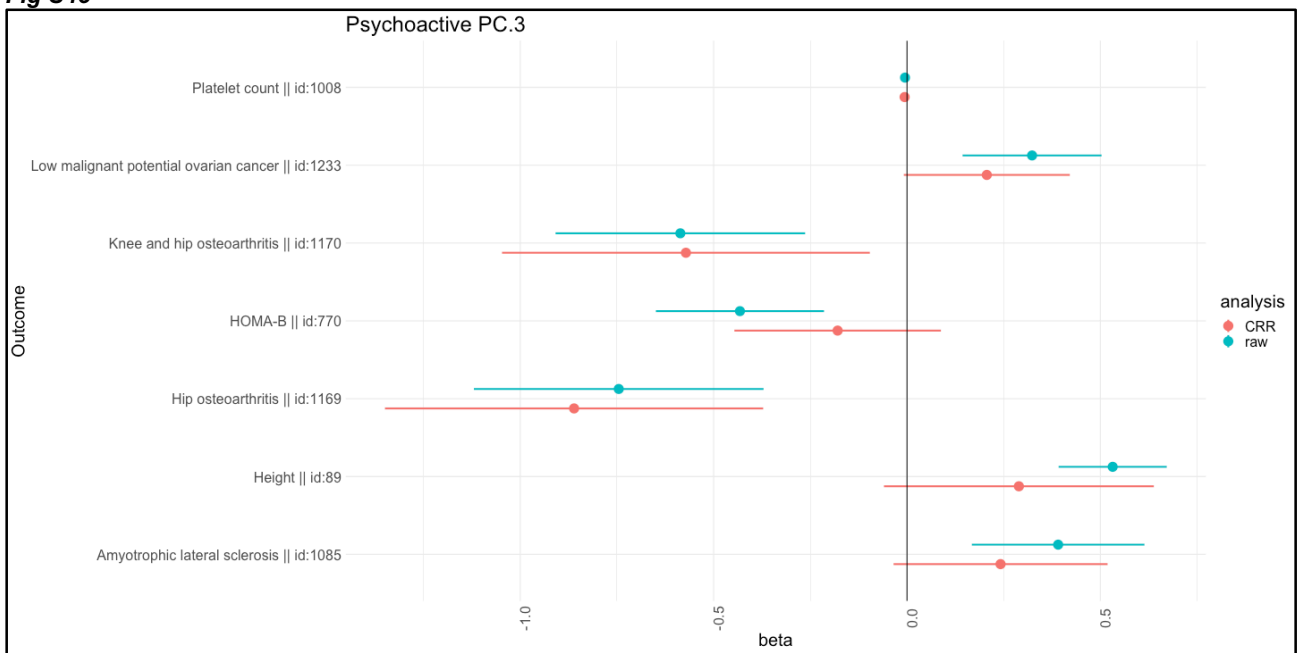

702

703 **Fig S46**

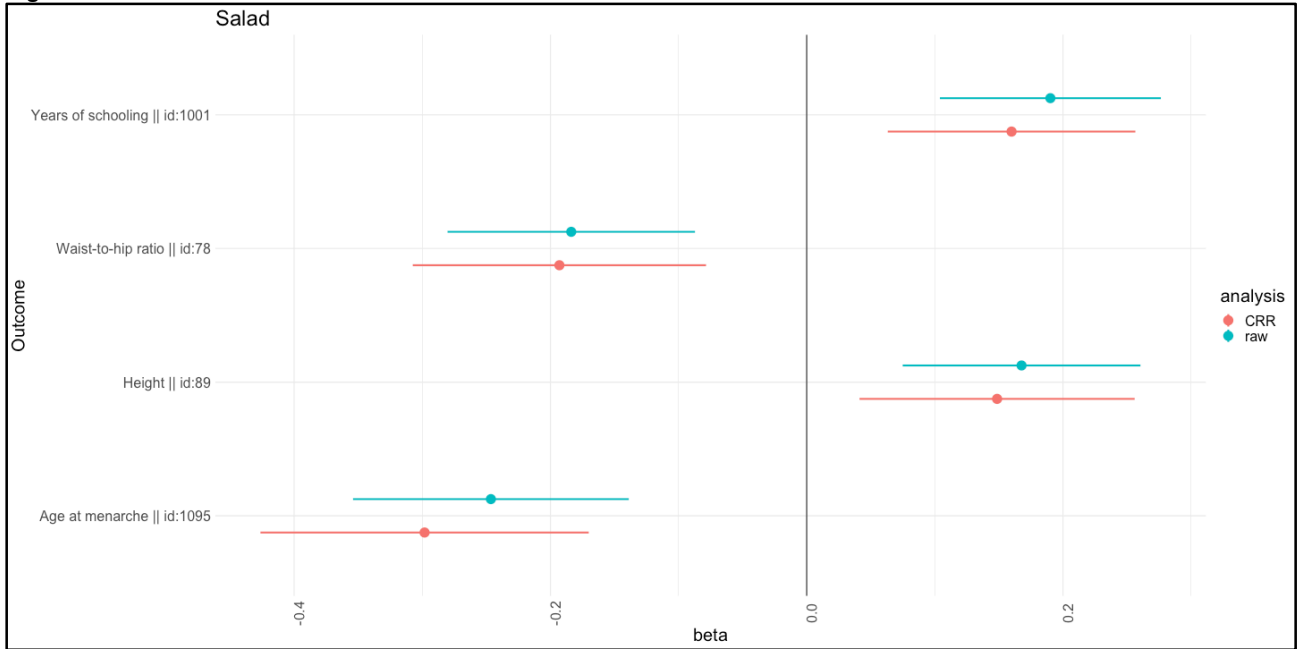

704 **Fig S47**

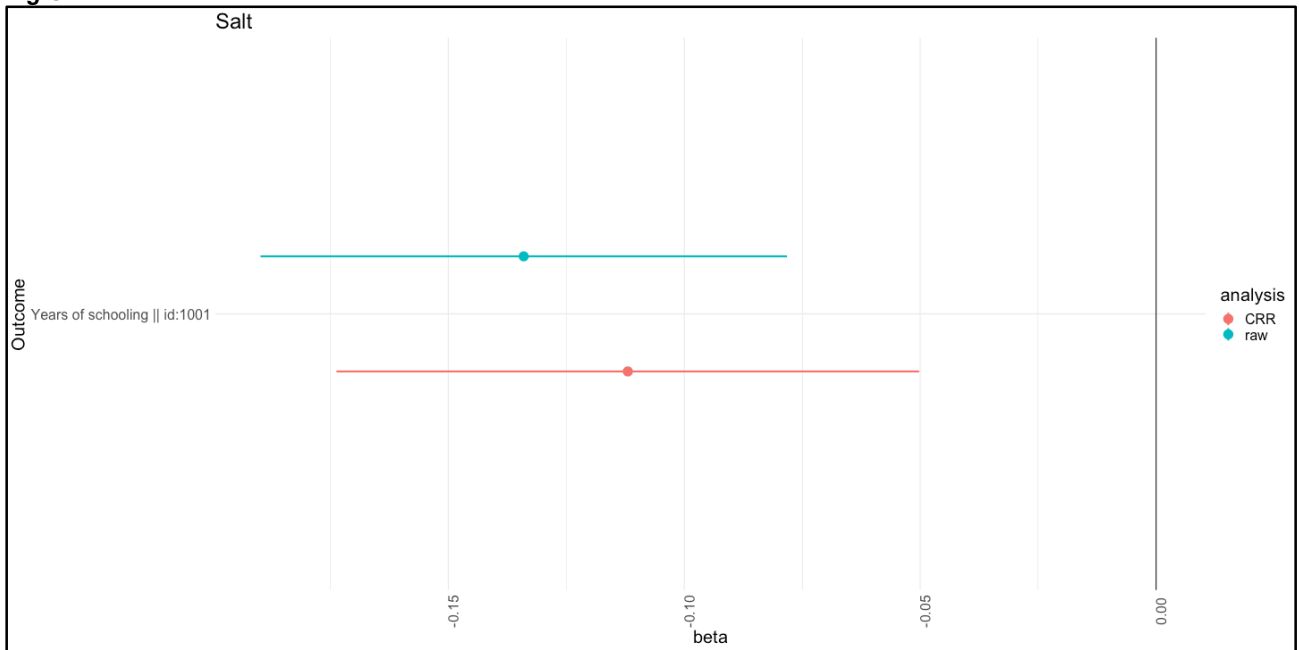

706

707 **Fig S48**

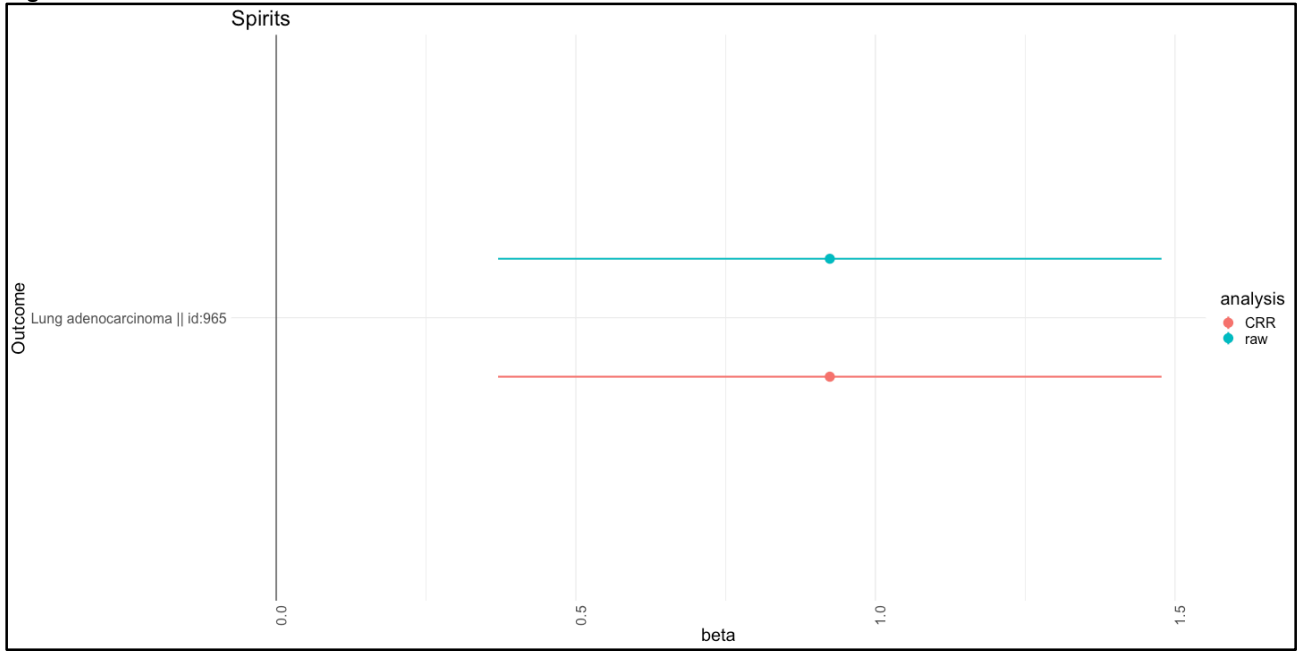

708 **Fig S49**

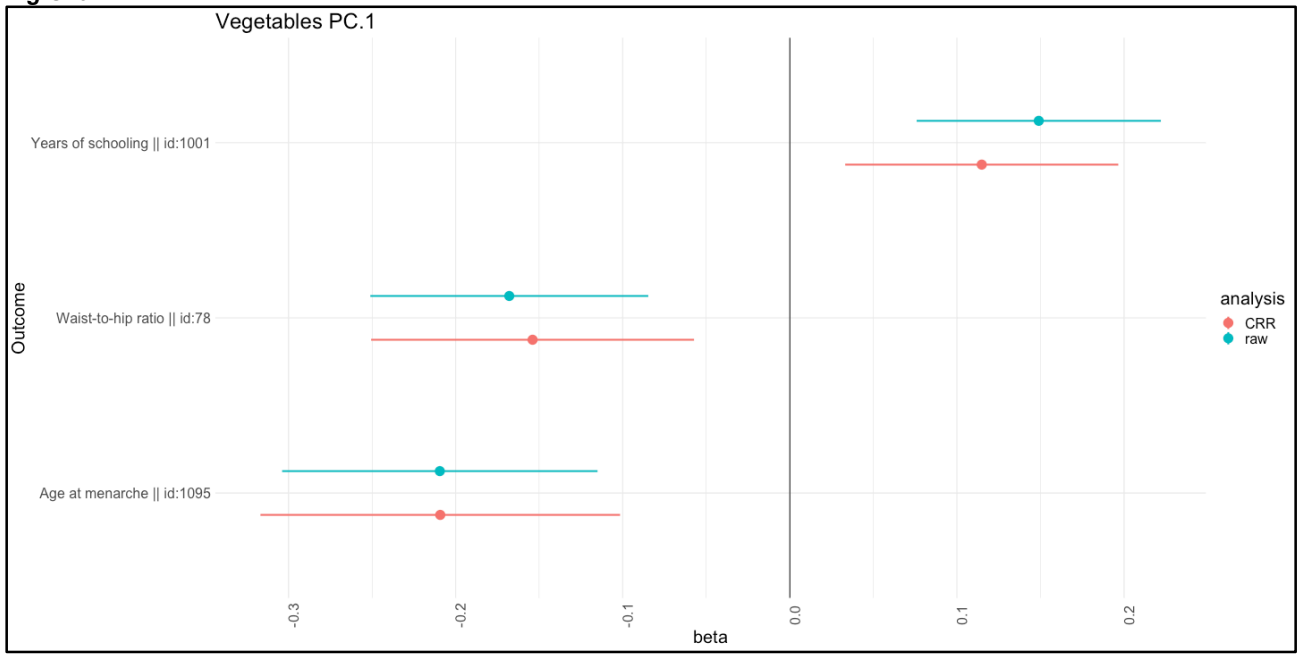

710

711

Fig S50

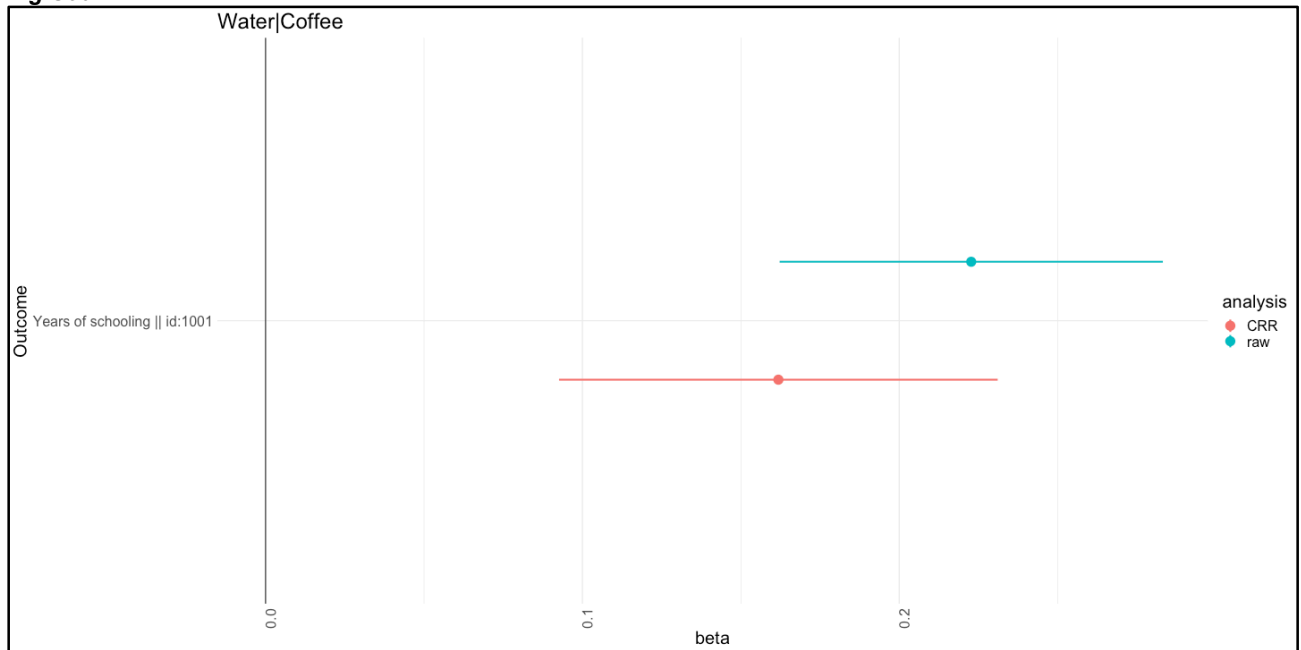

712

713

## 714 2.7 Comparison of the CRR filtering with Mendellian randomization common practice.

715 It is common practice in Mendellian randomization studies to determine the effect of horizontal  
 716 pleiotropy through sensitivity analyses using methods such as the weighted median<sup>26</sup> or by  
 717 evaluating the amount of heterogeneity in the effect estimates. In our case however we have  
 718 shown that at least in some cases more than half of the variants can't be considered reliable. This  
 719 means on one side that the assumption of the weighted median that at least half of the SNPs are  
 720 valid IVs is violated for several of our food stuff and on the other that heterogeneity filtering (as in  
 721 MR-Radial<sup>27</sup>, or MR-PRESSO<sup>28</sup>) could potentially exclude the SNPs which are the true valid  
 722 instruments. This is extremely problematic as it would lead to the wrong conclusions and results.  
 723 We have in fact used the MR-Radial method in the MR pipeline and still obtained biased results.  
 724 Another important point is that for the selection of the IVs it is in principle possible to use Steiger  
 725 filtering<sup>29</sup> for understanding for each SNP if the causal pathway goes from the exposure to the  
 726 outcome or the opposite. The test is based on evaluating how much variance of the exposure and  
 727 the outcome is explained by the instrument, if the SNP explains more variance of the exposure  
 728 than the outcome we can assume that the causal pathway goes from the exposure to the outcome,  
 729 if the opposite is true, we can then infer that the causal pathway is going in the other direction.

730 Although the test is generally quite sturdy, in our case the extremely high noise present in the  
731 phenotype makes using Steiger's test for distinguishing the SNPs directly associated to the food  
732 trait from those associated through other traits less reliable.  
733 To understand this issue let's imagine for simplicity that BMI is the only trait which is influencing  
734 causally either food consumption or food frequency questionnaire answers. As we cannot  
735 distinguish between the two cases not having an objective measure of consumption we can regard  
736 the two as being the same phenomenon, in fact if BMI influences how much we eat this will be  
737 transferred to the FFQ accordingly. Given we cannot distinguish between the two we need to  
738 evaluate any such effect as having a biasing effect on the FFQ response.  
739 Adding a SNP which is causal to BMI the resulting DAG would look as such

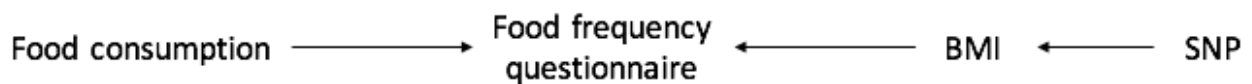

741  
742 In this case Steiger test will work as the variance explained by the SNP of BMI will always be  
743 greater than that explained on the FFQ as the effect is mediated through BMI, this is even truer if  
744 the effect is not directly on the FFQ but is mediated through FC.  
745 So if we knew the factors biasing the FFQ and if they were independent from each other we could  
746 in principle use Steiger test to distinguish which are the SNPs which are mediated through these  
747 factors.  
748 The problem arises when food consumption is causal to the confounding factor (as in many of the  
749 traits we used). For example, BMI is clearly caused by Food consumption, so after adding this  
750 information the DAG would look like.  
751



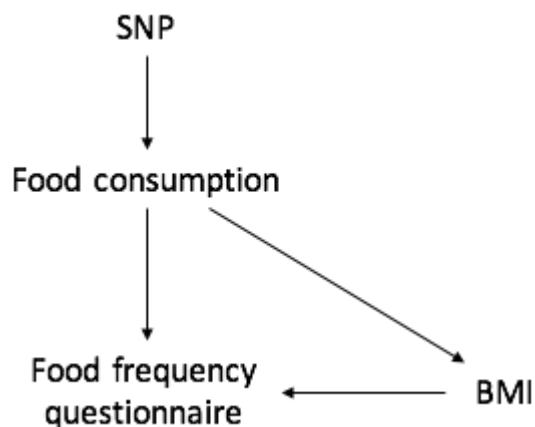

752

753 In this case we can think of FFQ as an independent trait which is caused by FC. In this case things  
 754 get more complicated as the  $r^2$  of the SNP on FFQ (which is what we would be using for the  
 755 comparison) depends on the correlation of FC and FFQ. This can be very variable but it rarely over  
 756 0.5<sup>30</sup> with the exception of alcohol and coffee consumption which have higher reliability. Thus, it  
 757 can be realistic that the causal effect of FC on BMI is similar in size to the direct causal effect of FC  
 758 on FFQ. In this case, the Steiger test may fail to detect the correct direction of effect. While our  
 759 approach has similarities to Steiger's test, its aims and settings are quite different in many aspects.  
 760 First, in our case the causal direction is clear because it is highly unlikely that FFQ items cause  
 761 other traits, only the upstream FC can do so. Second, our underlying DAG is more complicated  
 762 (with multiple exposures and underlying FC) than it is assumed by the Steiger test and our  
 763 approach fully exploits the a priori knowledge of the DAG. On the other hand, the Steiger test could  
 764 be used to select valid (direct) exposure (e.g. BMI) instruments in order to estimate the total (direct  
 765 plus indirect) exposure->FFQ causal effect, which in turn could be used to derive direct and  
 766 indirect SNP-FFQ effects.

767

768

769 **Bibliography**

- 770 1. McCarthy, S. *et al.* A reference panel of 64,976 haplotypes for genotype imputation. *Nat.*  
771 *Genet.* **48**, 1279–1283 (2016).
- 772 2. Loh, P.-R. *et al.* Efficient Bayesian mixed model analysis increases association power in large  
773 cohorts. doi:10.1101/007799
- 774 3. Bulik-Sullivan, B. K. *et al.* LD Score regression distinguishes confounding from polygenicity in  
775 genome-wide association studies. *Nat. Genet.* **47**, 291–295 (2015).
- 776 4. Day, N. *et al.* EPIC-Norfolk: study design and characteristics of the cohort. European  
777 Prospective Investigation of Cancer. *Br. J. Cancer* **80 Suppl 1**, 95–103 (1999).
- 778 5. Lotta, L. A. *et al.* Integrative genomic analysis implicates limited peripheral adipose storage  
779 capacity in the pathogenesis of human insulin resistance. *Nat. Genet.* **49**, 17–26 (2017).
- 780 6. Bingham, S. A. *et al.* Comparison of dietary assessment methods in nutritional epidemiology:  
781 weighed records v. 24 h recalls, food-frequency questionnaires and estimated-diet records. *Br.*  
782 *J. Nutr.* **72**, 619–643 (1994).
- 783 7. Hemani, G. *et al.* The MR-Base platform supports systematic causal inference across the  
784 human phenome. *Elife* **7**, (2018).
- 785 8. McDaid, A. F. *et al.* Bayesian association scan reveals loci associated with human lifespan  
786 and linked biomarkers. *Nat. Commun.* **8**, 15842 (2017).
- 787 9. VanderWeele, T. J. A three-way decomposition of a total effect into direct, indirect, and  
788 interactive effects. *Epidemiology* **24**, 224–232 (2013).
- 789 10. Rüeger, S., McDaid, A. & Kutalik, Z. Evaluation and application of summary statistic  
790 imputation to discover new height-associated loci. *PLoS Genet.* **14**, e1007371 (2018).
- 791 11. Zheng, J. *et al.* LD Hub: a centralized database and web interface to perform LD score  
792 regression that maximizes the potential of summary level GWAS data for SNP heritability and  
793 genetic correlation analysis. *Bioinformatics* **33**, 272–279 (2017).
- 794 12. Finucane, H. K. *et al.* Partitioning heritability by functional category using GWAS summary  
795 statistics. doi:10.1101/014241
- 796 13. de Leeuw, C. A., Mooij, J. M., Heskes, T. & Posthuma, D. MAGMA: generalized gene-set

- 797 analysis of GWAS data. *PLoS Comput. Biol.* **11**, e1004219 (2015).
- 798 14. Watanabe, K., Taskesen, E., van Bochoven, A. & Posthuma, D. Functional mapping and  
799 annotation of genetic associations with FUMA. *Nat. Commun.* **8**, 1826 (2017).
- 800 15. Szklarczyk, D. *et al.* STRING v10: protein–protein interaction networks, integrated over the  
801 tree of life. *Nucleic Acids Res.* **43**, D447–D452 (2015).
- 802 16. Yu, G., Wang, L.-G., Han, Y. & He, Q.-Y. clusterProfiler: an R package for comparing  
803 biological themes among gene clusters. *OMICS* **16**, 284–287 (2012).
- 804 17. Bowden, J. *et al.* Improving the visualization, interpretation and analysis of two-sample  
805 summary data Mendelian randomization via the Radial plot and Radial regression. *Int. J.*  
806 *Epidemiol.* **47**, 2100 (2018).
- 807 18. Paul, D. R., Rhodes, D. G., Kramer, M., Baer, D. J. & Rumpler, W. V. Validation of a food  
808 frequency questionnaire by direct measurement of habitual ad libitum food intake. *Am. J.*  
809 *Epidemiol.* **162**, 806–814 (2005).
- 810 19. Dehghan, M. *et al.* Association of dairy intake with cardiovascular disease and mortality in 21  
811 countries from five continents (PURE): a prospective cohort study. *Lancet* **392**, 2288–2297  
812 (2018).
- 813 20. Adam, T. C. & Epel, E. S. Stress, eating and the reward system. *Physiology & Behavior* **91**,  
814 449–458 (2007).
- 815 21. Consortium, G. & GTEx Consortium. Genetic effects on gene expression across human  
816 tissues. *Nature* **550**, 204–213 (2017).
- 817 22. Finucane, H. K. *et al.* Heritability enrichment of specifically expressed genes identifies  
818 disease-relevant tissues and cell types. *Nat. Genet.* **50**, 621–629 (2018).
- 819 23. Bernstein, B. E. *et al.* The NIH Roadmap Epigenomics Mapping Consortium. *Nat. Biotechnol.*  
820 **28**, 1045–1048 (2010).
- 821 24. Szklarczyk, D. *et al.* STRING v11: protein-protein association networks with increased  
822 coverage, supporting functional discovery in genome-wide experimental datasets. *Nucleic*  
823 *Acids Res.* **47**, D607–D613 (2019).
- 824 25. Blondel, V. D., Guillaume, J.-L., Lambiotte, R. & Lefebvre, E. Fast unfolding of communities in

- 825 large networks. *Journal of Statistical Mechanics: Theory and Experiment* **2008**, P10008  
826 (2008).
- 827 26. Bowden, J., Davey Smith, G., Haycock, P. C. & Burgess, S. Consistent Estimation in  
828 Mendelian Randomization with Some Invalid Instruments Using a Weighted Median Estimator.  
829 *Genet. Epidemiol.* **40**, 304–314 (2016).
- 830 27. Bowden, J. *et al.* Improving the visualisation, interpretation and analysis of two-sample  
831 summary data Mendelian randomization via the radial plot and radial regression.  
832 doi:10.1101/200378
- 833 28. Verbanck, M., Chen, C.-Y., Neale, B. & Do, R. Publisher Correction: Detection of widespread  
834 horizontal pleiotropy in causal relationships inferred from Mendelian randomization between  
835 complex traits and diseases. *Nat. Genet.* **50**, 1196 (2018).
- 836 29. Hemani, G., Tilling, K. & Davey Smith, G. Orienting the causal relationship between  
837 imprecisely measured traits using GWAS summary data. *PLoS Genet.* **13**, e1007081 (2017).
- 838 30. Kristal, A. R., Peters, U. & Potter, J. D. Is it time to abandon the food frequency questionnaire?  
839 *Cancer Epidemiol. Biomarkers Prev.* **14**, 2826–2828 (2005).
- 840
